# Supplementary material for: Germanyl triazoles as a platform for CuAAC diversification and chemoselective orthogonal cross-coupling
Source: publisher site journal article supplement (doi:10.3762/bjoc.20.265), 2024-12-05

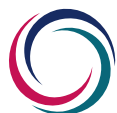

## Supporting Information

for

### **Germany triazoles as a platform for CuAAC diversification and chemoselective orthogonal cross-coupling**

John M. Halford-McGuff, Thomas M. Richardson, Aidan P. McKay, Frederik Peschke, Glenn A. Burley and Allan J. B. Watson

*Beilstein J. Org. Chem.* **2024**, *20*, 3198–3204. [doi:10.3762/bjoc.20.265](https://doi.org/10.3762/bjoc.20.265)

### **Characterization data and copies of NMR spectra**

## Table of contents

|   |                                             |     |
|---|---------------------------------------------|-----|
| 1 | General experimental information            | S2  |
| 2 | Optimisation                                | S3  |
| 3 | Starting material synthesis                 | S5  |
| 4 | Product synthesis and characterisation data | S13 |
| 5 | X-ray diffraction data                      | S28 |
| 6 | References                                  | S29 |
| 7 | Spectra                                     | S30 |

## 1. General experimental information

Reagents and solvents were obtained from commercial suppliers and were not purified further unless specified. Purification (where specified) was performed following the standard procedures.<sup>1</sup> Unless otherwise specified, reactions were carried out using dry solvents which were obtained from a PureSolv SPS-400-5 solvent purification system.

Reactions were carried out in standard borosilicate glassware or 2 mL HPLC vials with septum caps. Glassware was either flame-dried under vacuum or allowed to dry in a 180 °C oven for 24 h before use and then sparged with nitrogen. Room temperature (rt) was approximately 18 °C. Reactions at high temperature were heated using a DrySyn metal heating bath or a silicone oil bath. Reactions at 0 °C were performed using an ice/water bath, -5 °C reaction temperatures were achieved with an ice/brine mixture, and -78 °C used dry ice/acetone baths.

TLC was carried out using Merck aluminum-backed silica plates coated with F<sub>254</sub> fluorescent indicator, analysed under UV light, and developed using aqueous KMnO<sub>4</sub> or ethanolic vanillin solutions, where appropriate. Flash column chromatography was performed using silica gel (40–62 µm, Fluorochem).

<sup>1</sup>H, <sup>13</sup>C (DEPTQ), and <sup>19</sup>F NMR (with or without <sup>1</sup>H decoupling) spectra were recorded by either a Bruker AVII 400 (BBFO probe) or AVIII-HD 500 (and AVIII 500 with BBFO+ and Prodigy BBFO probes, respectively) at 400-101-376 MHz or at 500, 126, 377 MHz, respectively. <sup>1</sup>H NMR spectra at 700 MHz, <sup>13</sup>C at 176 MHz, and <sup>19</sup>F NMR at 659 MHz (without <sup>1</sup>H decoupling) were recorded on a Bruker AVIII-HD 700 with Prodigy TCI probe. <sup>11</sup>B NMR spectra were recorded on a Bruker AV400 at 126 MHz. All spectra were recorded at rt with the deuterated solvents used as a lock for spectra and internal reference (*d*-chloroform: <sup>1</sup>H, 7.26 ppm; <sup>13</sup>C, 77.16 ppm; *d*<sub>6</sub>-acetone: <sup>1</sup>H, 2.05 ppm, <sup>13</sup>C, 29.8 ppm; *d*<sub>6</sub>-dimethylsulfoxide: <sup>1</sup>H 2.50 ppm, <sup>13</sup>C 39.5 ppm; *d*<sub>3</sub>-acetonitrile: <sup>1</sup>H 1.94 ppm, <sup>13</sup>C 1.3 ppm). For <sup>11</sup>B NMR, samples were externally referenced to F<sub>3</sub>B·OEt<sub>2</sub> in CDCl<sub>3</sub>. NMR spectra are reported as follows: chemical shift/ppm (multiplicity, coupling constant(s), number of nuclei). Multiplicity given as br (broad), s (singlet), d (doublet), t (triplet), q (quartet), quint (quintet), h (hextet), m (multiplet), and combinations thereof. Throughout, <sup>13</sup>C signals adjacent to boron were not observed. Signals which overlap with one another are described as multiplets. IR spectra were recorded using a Shimadzu IT Affinity-1 Fourier transform IR spectrophotometer with a Specac Quest ATR (diamond puck). The spectra were recorded as specified in the procedure as films (using CH<sub>2</sub>Cl<sub>2</sub>), as solids, or as neat liquids. Transmittance was recorded with maximal absorption wavenumbers given as cm<sup>-1</sup>. Mass spectra were recorded on a Bruker micrOTOF benchtop ESI with either positive or negative electrospray ionization or EI using a Thermo Mat 900XP, double focusing high-resolution mass spectrometer. Note: a number of germanium alkynes are not detectable by HRMS due to excess fragmentation, although their click products, where appropriate, were characterised by HRMS.<sup>2,3</sup>



### Scheme S1C procedure:

An HPLC vial was charged with CuI (1.0 mg, 5.00  $\mu\text{mol}$ , 10 mol %) and the vial was then sealed, evacuated, and backfilled with  $\text{N}_2$  (3  $\times$ ). THF (500  $\mu\text{L}$ ) was added followed by benzyl azide (6.3  $\mu\text{L}$ , 100  $\mu\text{mol}$ , 2.0 equiv), then triethyl(ethynyl)germane (9.0  $\mu\text{L}$ , 50.0  $\mu\text{mol}$ , 1.0 equiv) and the solution was stirred for 18 h at rt. After this, the reaction was quenched with 10% aq.  $\text{NH}_3$  solution (5 mL) and extracted with  $\text{CH}_2\text{Cl}_2$  (3  $\times$  5 mL). The combined organic extracts were dried over  $\text{Na}_2\text{SO}_4$ , filtered, and concentrated in vacuo. The NMR yield was then determined from the crude reaction mixture through comparison to a trichloroethylene (TCE) (9.0  $\mu\text{L}$ , 100  $\mu\text{mol}$ , 2.0 equiv) internal standard.

### Scheme S1D procedure:

An HPLC vial was charged with sodium L-ascorbate (5.0 mg, 25.0  $\mu\text{mol}$ , 0.50 equiv) and  $\text{CuSO}_4$  (3.1 mg, 12.5  $\mu\text{mol}$ , 25 mol %). The vial was then sealed, evacuated, and backfilled with  $\text{N}_2$  (3  $\times$ ), before adding a 1:1 mixture of *t*-BuOH/ $\text{H}_2\text{O}$  (200  $\mu\text{L}$ , 0.25 M). Triethylamine (7.0  $\mu\text{L}$ , 50.0  $\mu\text{mol}$ , 1.0 equiv) was added followed by benzyl azide (6.9  $\mu\text{L}$ , 55.0  $\mu\text{mol}$ , 1.1 equiv), and triethyl(ethynyl)germane (9.0  $\mu\text{L}$ , 50.0  $\mu\text{mol}$ , 1.0 equiv) and the solution was stirred for 18 h at rt. After this, the reaction was quenched with 10% aq.  $\text{NH}_3$  solution (5.0 mL) and extracted with  $\text{CH}_2\text{Cl}_2$  (3  $\times$  5 mL). The combined organic extracts were dried over  $\text{Na}_2\text{SO}_4$ , filtered, and concentrated in vacuo. The NMR yield was then determined from the crude reaction mixture through comparison to a trichloroethylene (TCE) (9.0  $\mu\text{L}$ , 100  $\mu\text{mol}$ , 2.0 equiv) internal standard.

**Table S1:** Ge CuAAC optimisation.

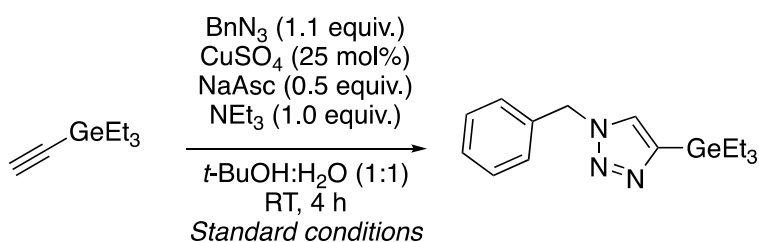

| Entry | Changes from standard conditions                           | Yield (%) <sup>a</sup> |
|-------|------------------------------------------------------------|------------------------|
| 1     | -                                                          | 36                     |
| 2     | 18 h                                                       | 88                     |
| 3     | No NaAsc                                                   | 24                     |
| 4     | No base                                                    | 41                     |
| 5     | No <i>t</i> -BuOH                                          | 50                     |
| 6     | No $\text{H}_2\text{O}$                                    | 58                     |
| 7     | $\text{CuSO}_4 \cdot 5\text{H}_2\text{O}$ (5.0 mol%), 16 h | >99                    |

<sup>a</sup>Determined by  $^1\text{H}$  NMR using trichloroethylene (TCE) as internal standard. 50.0  $\mu\text{mol}$  scale.

### Table S1 procedure:

An HPLC vial was charged with sodium L-ascorbate (5.0 mg, 25.0  $\mu\text{mol}$ , 0.50 equiv) and either  $\text{CuSO}_4$  (3.1 mg, 12.5  $\mu\text{mol}$ , 25 mol %) or  $\text{CuSO}_4 \cdot 5\text{H}_2\text{O}$  (0.6 mg, 2.5  $\mu\text{mol}$ , 5.0 mol %). The vial was then sealed, evacuated, and backfilled with  $\text{N}_2$  (3  $\times$ ), before adding a 1:1 mixture of *t*-BuOH/ $\text{H}_2\text{O}$  (200  $\mu\text{L}$ , 0.25 M). Triethylamine (7.0  $\mu\text{L}$ , 50.0  $\mu\text{mol}$ , 1.0 equiv) was added followed by benzyl azide (6.9  $\mu\text{L}$ , 55.0  $\mu\text{mol}$ , 1.1 equiv), and triethyl(ethynyl)germane (9.0  $\mu\text{L}$ , 50.0  $\mu\text{mol}$ , 1.0 equiv) and the solution was stirred for four hours at rt. After this, the reaction was quenched with 10% aq.  $\text{NH}_3$  solution (5 mL) and extracted with  $\text{CH}_2\text{Cl}_2$  (3  $\times$  5 mL). The combined organic extracts were dried over  $\text{Na}_2\text{SO}_4$ , filtered, and concentrated in vacuo. The NMR yield was then determined from the crude reaction mixture through comparison to a trichloroethylene (TCE) (9.0  $\mu\text{L}$ , 50.0  $\mu\text{mol}$ , 2.0 equiv) internal standard.

### 3. Starting material synthesis

#### General Procedure A

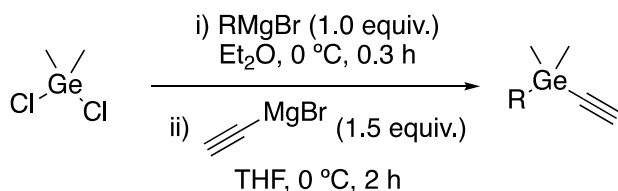

A flame-dried flask was charged with dichlorodimethylgermane (116  $\mu\text{L}$ , 1.00 mmol, 1.0 equiv) and  $\text{Et}_2\text{O}$  (20 mL, 0.05 M) under  $\text{N}_2$  and the resulting mixture was cooled to 0  $^\circ\text{C}$ . A solution of the chosen Grignard reagent (1.0 equiv) was added dropwise, and the mixture was stirred for 20 min. A solution of ethynylmagnesium bromide in THF (3.00 mL, 0.5 M, 1.50 mmol, 1.5 equiv) was added dropwise at 0  $^\circ\text{C}$ . The mixture was stirred for two hours while allowing it to warm to rt. The mixture was quenched by the addition of  $\text{H}_2\text{O}$  (5 mL) and the biphasic system was extracted with  $\text{Et}_2\text{O}$  ( $3 \times 10$  mL). The combined organic extracts were dried over  $\text{Na}_2\text{SO}_4$ , filtered, and concentrated in vacuo to give the crude product, which was purified by flash column chromatography. Respective purification methods are disclosed below.

#### General Procedure B

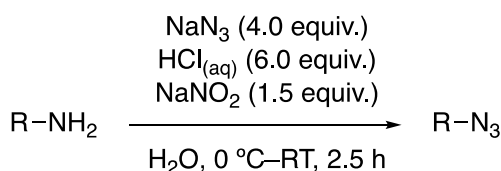

A round-bottomed flask was charged with the chosen amine (1.0 equiv) and aq. 6 M  $\text{HCl}$  (6.0 equiv) and the mixture was cooled to 0  $^\circ\text{C}$ . A solution of sodium nitrite (1.5 equiv) in distilled  $\text{H}_2\text{O}$  ( $\approx 1.0$  M) was added and the resulting solution was stirred at 0  $^\circ\text{C}$  for 30 min. A solution of sodium azide (4.0 equiv.) in distilled  $\text{H}_2\text{O}$  ( $\approx 3.0$  M) was added dropwise at 0  $^\circ\text{C}$ . The mixture was stirred for two hours while allowing it to warm to rt. The mixture was quenched with sat. aq.  $\text{NaHCO}_3$  (5 mL per mmol amine) and extracted with  $\text{Et}_2\text{O}$  ( $3 \times 10$  mL per mmol amine). The combined organic extracts were washed with brine, dried over  $\text{Na}_2\text{SO}_4$ , filtered, and concentrated in vacuo to give the desired product as a brown liquid, which was used without further purification.

#### General Procedure C

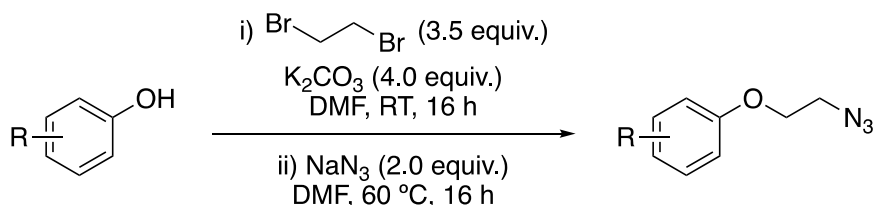

An oven-dried flask was charged with the chosen phenol (1.0 equiv), 1,2-dibromoethane (3.5 equiv), and DMF (0.4 M).  $\text{K}_2\text{CO}_3$  (4.0 equiv) was added, and the mixture was stirred at rt for 16 h.  $\text{H}_2\text{O}$  (5 mL per mmol of phenol) was added, and the mixture was extracted with  $\text{Et}_2\text{O}$  (5 mL per mmol of phenol). The organic extract was washed with  $\text{H}_2\text{O}$  ( $2 \times 5$  mL per mmol of phenol), then brine ( $3 \times 5$  mL per mmol of phenol). The combined organic extracts were dried over  $\text{MgSO}_4$ , filtered, and concentrated in vacuo to yield a residue that was used in the next step without further purification.

A flask was charged with the prepared alkyl bromide (1.0 equiv) and DMF (0.3 M). NaN<sub>3</sub> (2.0 equiv) was added, and the mixture was heated to 60 °C and stirred for 16 h. The mixture was allowed to cool to rt and H<sub>2</sub>O (5 mL per mmol of alkyl bromide) was added. The mixture was extracted with EtOAc (5 mL per mmol of alkyl bromide). The organic extract was washed with H<sub>2</sub>O (2 × 5 mL per mmol of phenol), then brine (3 × 5 mL per mmol of phenol). The organic extract was dried over MgSO<sub>4</sub>, filtered, and concentrated in vacuo to give the crude product, which was purified by flash column chromatography. Respective purification methods are disclosed below.

#### General Procedure D

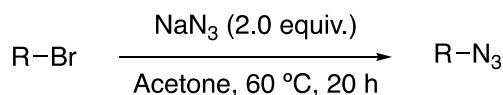

An oven-dried microwave vial was charged with the chosen alkyl bromide (1.0 equiv) and acetone (1.0 M). NaN<sub>3</sub> (2.0 equiv) was added, and the mixture was heated to 60 °C and stirred for 20 h. The mixture was allowed to cool to rt and H<sub>2</sub>O (10 mL per mmol of reactant) was added. The mixture was extracted with Et<sub>2</sub>O (2 × 20 mL per mmol of reactant), and the combined organic extracts were washed with brine (3 × 10 mL per mmol of reactant), dried over Na<sub>2</sub>SO<sub>4</sub>, filtered, and concentrated in vacuo to give the crude product, which was purified by flash column chromatography. Respective purification methods are disclosed below.

#### Benzyl(ethynyl)dimethylgermane (S1)

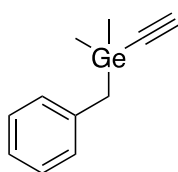

Prepared according to **General Procedure A** using an Et<sub>2</sub>O solution of benzylmagnesium chloride (810 μL, 1.23 M, 1.00 mmol, 1.0 equiv) to afford the crude product. This was purified by flash column chromatography (silica, hexane) to give the desired product as a colourless oil (71.9 mg, 329 μmol, 33%).

<sup>1</sup>H NMR (500 MHz, CDCl<sub>3</sub>) δ 7.24 (t, *J* = 7.6 Hz, 2H), 7.13 – 7.07 (m, 3H), 2.41 (s, 2H), 2.32 (s, 1H), 0.31 (s, 6H).

<sup>13</sup>C NMR (126 MHz, CDCl<sub>3</sub>) δ 139.3, 128.5, 128.1, 124.8, 93.0, 88.9, 26.0, –2.3.

IR (ATR, film) ν<sub>max</sub> 3285, 2913, 2029, 1600, 1493, 1452, 1209, 810, 752 cm<sup>-1</sup>.

HRMS inconclusive due to excessive fragmentation.

#### Ethynyl dimethyl(*o*-tolyl)germane (S2)

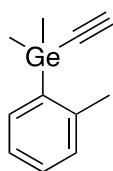

Prepared according to **General Procedure A** using an Et<sub>2</sub>O solution of *o*-tolylmagnesium chloride (1.00 mL, 1.0 M, 1.00 mmol, 1.0 equiv) to afford the crude product. This was purified by flash column chromatography (silica, 10% Et<sub>2</sub>O in hexane) to give the desired product as a colourless oil (86.7 mg, 396 μmol, 40%).

<sup>1</sup>H NMR (500 MHz, CDCl<sub>3</sub>) δ 7.60 (dd, *J* = 7.1, 1.8 Hz, 1H), 7.31 – 7.27 (m, 1H), 7.23 – 7.17 (m, 2H), 2.49 (s, 3H), 2.43 (s, 1H), 0.66 (s, 6H).

<sup>13</sup>C NMR (126 MHz, CDCl<sub>3</sub>) δ 142.9, 136.5, 134.0, 130.0, 129.7, 125.5, 93.6, 88.9, 22.9, –0.1.

IR (ATR, film) ν<sub>max</sub> 3273, 2914, 2029, 1558, 1447, 1240, 1125, 810 cm<sup>-1</sup>.

HRMS inconclusive due to excessive fragmentation.

#### 4-Azido-*N*-(pyrimidin-2-yl)benzenesulfonamide (S3)

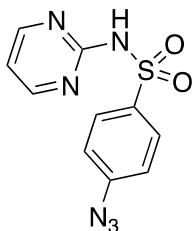

Prepared according to **General Procedure B** using 4-amino-*N*-(pyrimidin-2-yl)benzenesulfonamide (2.50 g, 10.0 mmol, 1.0 equiv) to give the desired product as a white solid, which was used without further purification (2.50 g, 9.00 mmol, 90%).

$^1\text{H NMR}$  (500 MHz,  $\text{DMSO-}d_6$ )  $\delta$  11.76 (br. s, 1H), 8.49 (d,  $J = 4.9$  Hz, 2H), 7.98 (d,  $J = 8.7$  Hz, 2H), 7.28 (d,  $J = 8.7$  Hz, 2H), 7.04 (t,  $J = 4.9$  Hz, 1H).

$^{13}\text{C NMR}$  (126 MHz,  $\text{DMSO-}d_6$ )  $\delta$  158.4, 157.0, 144.1, 136.6, 129.6, 119.4, 115.7.

Spectral data in agreement with the literature.<sup>4</sup>

#### 10-(4-(2-Azidoethoxy)phenyl)-10*H*-phenothiazine (S4)

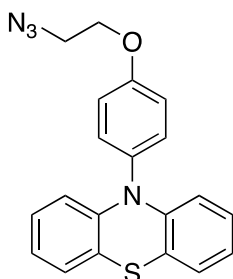

Prepared according to **General Procedure C** using 4-(10*H*-phenothiazin-10-yl)phenol (291 mg, 1.00 mmol, 1.0 equiv) to afford the crude product. This was purified by flash column chromatography (silica, 5–20%  $\text{Et}_2\text{O}$  in hexane) to give the desired product as a white solid (159 mg, 440  $\mu\text{mol}$ , 44%).

$^1\text{H NMR}$  (500 MHz,  $\text{CDCl}_3$ )  $\delta$  7.36 – 7.29 (m, 2H), 7.17 – 7.10 (m, 2H), 6.99 (dd,  $J = 7.4, 1.7$  Hz, 2H), 6.86 – 6.81 (m, 2H), 6.81 – 6.77 (m, 2H), 6.18 (dd,  $J = 8.1, 1.4$  Hz, 2H), 4.24 (t,  $J = 4.9$  Hz, 2H), 3.67 (t,  $J = 4.9$  Hz, 2H).

$^{13}\text{C NMR}$  (126 MHz,  $\text{CDCl}_3$ )  $\delta$  158.0, 144.7, 134.1, 132.6, 127.7, 126.8, 122.5, 119.8, 116.6, 115.8, 67.4, 50.3.

**IR** (ATR, solid)  $\nu_{\text{max}}$  2089, 1506, 1456, 1298, 1229, 1057, 1042, 908  $\text{cm}^{-1}$ .

**HRMS** (ESI) Calculated for 361.1118  $m/z$ , found 361.1113  $m/z$  [ $\text{C}_{20}\text{H}_{16}\text{N}_4\text{OS}+\text{H}$ ] $^+$ .

#### 4-(2-Azidoethoxy)-2*H*-chromen-2-one (S5)

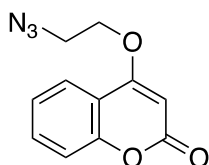

Prepared according to **General Procedure C** using 4-hydroxy-2*H*-chromen-2-one (973 mg, 6.00 mmol, 1.0 equiv) to afford the crude product. This was purified by flash column chromatography (silica, 5–20%  $\text{Et}_2\text{O}$  in hexane) to give the desired product as a white solid (560 mg, 2.40 mmol, 40%).

$^1\text{H NMR}$  (500 MHz,  $\text{CDCl}_3$ )  $\delta$  7.84 (dd,  $J = 7.9, 1.6$  Hz, 1H), 7.57 (ddd,  $J = 8.7, 7.3, 1.6$  Hz, 1H), 7.34 (dd,  $J = 8.5, 1.1$  Hz, 1H), 7.30 (ddd,  $J = 8.2, 7.3, 1.1$  Hz, 1H), 5.69 (s, 1H), 4.31 (t,  $J = 4.8$  Hz, 2H), 3.75 (t,  $J = 4.8$  Hz, 2H).

$^{13}\text{C NMR}$  (126 MHz,  $\text{CDCl}_3$ )  $\delta$  165.3, 162.7, 153.5, 132.9, 124.3, 123.2, 117.0, 115.4, 91.1, 68.4, 49.8

Spectral data in agreement with the literature.<sup>5</sup>



## 2-(Azidomethyl)pyridine (S6)

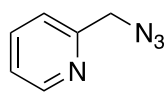

A flask was charged with NaN<sub>3</sub> (1.18 g, 18.2 mmol, 1.8 equiv) and DMF (10 mL). 2-(Bromomethyl)pyridine hydrobromide (2.53 g, 10.0 mmol, 1.0 equiv) was added followed by K<sub>2</sub>CO<sub>3</sub> (2.51 g, 18.2 mmol, 1.8 equiv) and the mixture was stirred at rt for 16 h. The mixture was diluted with H<sub>2</sub>O (20 mL) and extracted with Et<sub>2</sub>O (3 × 10 mL). The combined organic extracts were dried over MgSO<sub>4</sub>, filtered, and concentrated in vacuo to give the desired product as a brown oil, which was used without further purification (1.15 g, 8.58 mmol, 86%).

<sup>1</sup>H NMR (700 MHz, CDCl<sub>3</sub>) δ 8.61 – 8.55 (m, 1H), 7.75 – 7.65 (m, 1H), 7.33 (d, *J* = 7.8 Hz, 1H), 7.23 (dd, *J* = 7.5, 4.9 Hz, 1H), 4.47 (s, 2H).

<sup>13</sup>C NMR (176 MHz, CDCl<sub>3</sub>) δ 155.8, 149.8, 137.1, 123.0, 122.1, 55.8.

Spectral data in agreement with the literature.<sup>6</sup>

## 1-(Azidomethyl)-4-fluorobenzene (S7)

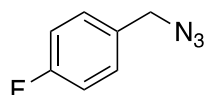

A flask was charged with NaN<sub>3</sub> (1.30 g, 20.0 mmol, 2.0 equiv) and DMF (10 mL). 4-Fluorobenzyl bromide (1.25 mL, 10.0 mmol, 1.0 equiv) was added and the mixture was heated to 60 °C and stirred for 16 h. The mixture was allowed to cool to rt, diluted with H<sub>2</sub>O (20 mL) and extracted with Et<sub>2</sub>O (3 × 10 mL). The combined organic extracts were washed with brine (5 × 10 mL), dried over MgSO<sub>4</sub>, filtered, and concentrated in vacuo to give the desired product as a colourless oil, which was used without further purification (1.50 g, 9.92 mmol, 99%).

<sup>1</sup>H NMR (700 MHz, CDCl<sub>3</sub>) δ 7.32 – 7.28 (m, 2H), 7.11 – 7.05 (m, 2H), 4.32 (s, 2H).

<sup>13</sup>C NMR (176 MHz, CDCl<sub>3</sub>) δ 162.8 (d, <sup>1</sup>*J*<sub>CF</sub> = 247.2 Hz), 131.3 (d, <sup>3</sup>*J*<sub>CF</sub> = 3.1 Hz), 130.2 (d, <sup>2</sup>*J*<sub>CF</sub> = 8.3 Hz), 115.9, 54.2.

<sup>19</sup>F NMR (659 MHz, CDCl<sub>3</sub>) δ –113.57 (tt, *J* = 8.8, 4.8 Hz).

Spectral data in agreement with the literature.<sup>7</sup>

## 1-Azido-4-fluorobenzene (S8)

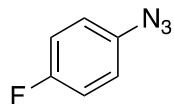

Prepared according to **General Procedure B** using 4-fluoroaniline (1.11 g, 10.0 mmol, 1.0 equiv) to give the desired product as a brown oil, which was used without further purification (1.37 g, 10.0 mmol, >99%).

<sup>1</sup>H NMR (500 MHz, CDCl<sub>3</sub>) δ 7.08 – 7.02 (m, 2H), 7.02 – 6.96 (m, 2H).

<sup>13</sup>C NMR (176 MHz, CDCl<sub>3</sub>) δ 160.1 (d, <sup>1</sup>*J*<sub>CF</sub> = 244.3 Hz), 136.0 (d, <sup>4</sup>*J*<sub>CF</sub> = 2.3 Hz), 120.5 (d, <sup>3</sup>*J*<sub>CF</sub> = 8.2 Hz), 116.8 (d, <sup>2</sup>*J*<sub>CF</sub> = 23.1 Hz).

<sup>19</sup>F NMR (659 MHz, CDCl<sub>3</sub>) δ –117.73 (tt, *J* = 8.5, 4.3 Hz).

Spectral data in agreement with the literature.<sup>8</sup>

### 1-Azido-4-methylbenzene (S9)

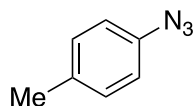

Prepared according to **General Procedure B** using *p*-toluidine (1.07 g, 10.0 mmol, 1.0 equiv) to give the desired product as a brown oil, which was used without further purification (1.33 g, 10.0 mmol, >99%).

$^1\text{H NMR}$  (700 MHz,  $\text{CDCl}_3$ )  $\delta$  7.18 – 7.14 (m, 2H), 6.95 – 6.90 (m, 2H), 2.34 (d,  $J$  = 3.2 Hz, 3H).

$^{13}\text{C NMR}$  (176 MHz,  $\text{CDCl}_3$ )  $\delta$  137.3, 134.7, 130.5, 119.0, 21.0.

Spectral data in agreement with the literature.<sup>8</sup>

### 2-Azido-1-phenylethan-1-one (S10)

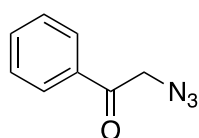

A flask was charged with 2-bromoacetophenone (1.59 g, 8.00 mmol, 1.0 equiv) and DMF (8.0 mL).  $\text{NaN}_3$  (1.04 g, 16.0 mmol, 2.0 equiv) was added and the mixture was stirred at rt for three hours.  $\text{H}_2\text{O}$  (20 mL) was added, and the mixture was extracted with  $\text{Et}_2\text{O}$  ( $3 \times 10$  mL). The combined organic extracts were washed with brine ( $5 \times 10$  mL), dried over  $\text{MgSO}_4$ , filtered, and concentrated in vacuo to give the desired product as a brown solid, which was used without further purification (1.29 g, 8.00 mmol, >99%).

$^1\text{H NMR}$  (500 MHz,  $\text{CDCl}_3$ )  $\delta$  7.91 (dd,  $J$  = 8.3, 1.4 Hz, 2H), 7.66 – 7.59 (m, 1H), 7.53 – 7.47 (m, 2H), 4.56 (s, 2H).

$^{13}\text{C NMR}$  (126 MHz,  $\text{CDCl}_3$ )  $\delta$  193.3, 134.5, 134.3, 129.1, 128.1, 55.0.

Spectral data in agreement with the literature.<sup>9</sup>

### 1-(Azidomethyl)-2-nitrobenzene (S11)

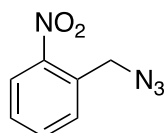

Prepared according to **General Procedure D** from 1-(bromomethyl)-2-nitrobenzene (648 mg, 3.00 mmol, 1.0 equiv) to afford the crude product. This was purified by flash column chromatography (silica, 0–10%  $\text{Et}_2\text{O}$  in hexane) to give the desired product as a yellow oil (475 mg, 2.67 mmol, 89%).

$^1\text{H NMR}$  (400 MHz,  $\text{CDCl}_3$ )  $\delta$  8.17 – 8.04 (m, 1H), 7.74 – 7.62 (m, 2H), 7.55 – 7.49 (m, 1H), 4.85 (s, 2H).

$^{13}\text{C NMR}$  (101 MHz,  $\text{CDCl}_3$ )  $\delta$  147.8, 134.1, 131.7, 130.3, 129.2, 125.4, 52.1.

Spectral data in agreement with the literature.<sup>10</sup>

### 1-(Azidomethyl)-2-iodobenzene (S12)

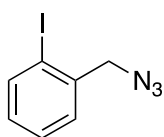

Prepared according to **General Procedure D** from 1-(bromomethyl)-2-iodobenzene (891 mg, 3.00 mmol, 1.0 equiv) to afford the crude product. This was purified by flash column chromatography (silica, 0–5% Et<sub>2</sub>O in hexane) to give the desired product as a colourless oil (598 mg, 2.31 mmol, 77%).

<sup>1</sup>H NMR (400 MHz, CDCl<sub>3</sub>) δ 7.88 (dd, *J* = 8.0, 0.9 Hz, 1H), 7.44 – 7.34 (m, 2H), 7.10 – 6.98 (m, 1H), 4.46 (s, 2H).

<sup>13</sup>C NMR (101 MHz, CDCl<sub>3</sub>) δ 139.9, 138.3, 130.1, 129.6, 128.8, 99.1, 59.2.

Spectral data in agreement with the literature.<sup>11</sup>

### 2-(4-(Azidomethyl)phenyl)-4,4,5,5-tetramethyl-1,3,2-dioxaborolane (S13)

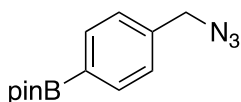

Prepared according to **General Procedure D** from 2-(4-(bromomethyl)phenyl)-4,4,5,5-tetramethyl-1,3,2-dioxaborolane (743 mg, 2.50 mmol, 1.0 equiv) to afford the crude product. This was purified by flash column chromatography (silica, 0–5% Et<sub>2</sub>O in hexane) to give the desired product as a colourless oil (84.2 mg, 325 μmol, 13%).

<sup>1</sup>H NMR (400 MHz, CDCl<sub>3</sub>) δ 7.92 – 7.76 (m, 2H), 7.34 – 7.30 (m, 2H), 4.35 (s, 2H), 1.35 (s, 12H).

<sup>13</sup>C NMR (101 MHz, CDCl<sub>3</sub>) δ 138.4, 135.4, 127.6, 84.1, 54.9, 33.5, 25.0.

<sup>11</sup>B NMR (128 MHz, CDCl<sub>3</sub>) δ 31.0.

Spectral data in agreement with the literature.<sup>12</sup>

### (*E*)-(2-Azidovinyl)benzene (S14)

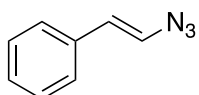

An oven-dried microwave vial was charged with styreneboronic acid (148 mg, 1.00 mmol, 1.0 equiv), MeOH (3.0 mL), and anhydrous CuSO<sub>4</sub> (16.0 mg, 100 μmol, 10 mol %). NaN<sub>3</sub> (78.0 mg, 1.20 mmol, 1.2 equiv) was added and the mixture was stirred at rt open to air for 16 h. The mixture was concentrated in vacuo to afford the crude product. This was purified by flash column chromatography (silica, 0–10% Et<sub>2</sub>O in hexane) to give the desired product as a yellow oil (37.7 mg, 260 μmol, 26%).

<sup>1</sup>H NMR (400 MHz, CDCl<sub>3</sub>) δ 7.35 – 7.26 (m, 4H), 7.25 – 7.20 (m, 1H), 6.61 (d, *J* = 13.8 Hz, 1H), 6.28 (d, *J* = 13.8 Hz, 1H).

<sup>13</sup>C NMR (101 MHz, CDCl<sub>3</sub>) δ 135.2, 128.9, 127.5, 126.8, 126.0, 119.9.

Spectral data in agreement with the literature.<sup>13</sup>

### 1-(2-Azidoethyl) 3-methyl bicyclo[1.1.1]pentane-1,3-dicarboxylate (S15)

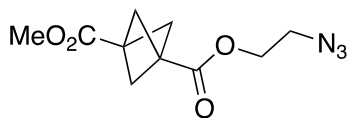

A flame-dried flask was charged with 3-(methoxycarbonyl)bicyclo[1.1.1]pentane-1-carboxylic acid (170 mg, 1.00 mmol, 1.0 equiv), DMAP (12.2 mg, 100  $\mu\text{mol}$ , 10 mol %), DCC (268 mg, 1.30 mmol, 1.3 equiv), and  $\text{CH}_2\text{Cl}_2$  (5.0 mL). 2-Azidoethan-1-ol (131 mg, 1.50 mmol, 1.5 equiv) was added and the mixture was stirred for 16 h at rt. The reaction mixture was filtered and concentrated in vacuo to afford the crude product. This was purified by flash column chromatography (silica, 0–20%  $\text{Et}_2\text{O}$  in hexane) to give the desired product as a white solid (203 mg, 849  $\mu\text{mol}$ , 85%).

$^1\text{H NMR}$  (700 MHz,  $\text{CDCl}_3$ )  $\delta$  4.30 – 4.26 (m, 2H), 3.69 (s, 3H), 3.48 – 3.42 (m, 2H), 2.35 (s, 6H).

$^{13}\text{C NMR}$  (176 MHz,  $\text{CDCl}_3$ )  $\delta$  169.7, 169.0, 63.9, 53.0, 52.0, 49.7, 37.8, 37.7.

IR (ATR, film)  $\nu_{\text{max}}$  2926, 2102, 1729, 1439, 1285, 1209, 1194, 1159, 1144, 1051  $\text{cm}^{-1}$ .

HRMS (ESI) Calculated for 240.0979  $m/z$ , found 240.0975  $m/z$  [ $\text{C}_{10}\text{H}_{13}\text{N}_3\text{O}_4+\text{H}$ ] $^+$ .

### 4-(Methoxycarbonyl)cubane-1-carboxylic acid (S16)

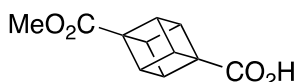

A flask was charged with dimethyl cubane-1,4-dicarboxylate (231 mg, 1.05 mmol, 1.1 equiv) and THF (7.0 mL). NaOH (40.0 mg, 1.00 mmol, 1.0 equiv) in MeOH (7.0 mL) was added, and the mixture was stirred for 16 h at rt, then concentrated in vacuo. The residue was suspended in  $\text{CH}_2\text{Cl}_2$  (10 mL) and filtered. The filtered solid was dissolved in  $\text{H}_2\text{O}$  (5.0 mL) and acidified with dilute aq. HCl until a pH 1 was reached. The aqueous mixture was then extracted with  $\text{CH}_2\text{Cl}_2$  ( $3 \times 10$  mL) and the combined organic extracts were dried over  $\text{Na}_2\text{SO}_4$ , filtered, and concentrated in vacuo to give the desired product as a white solid, which was used without further purification (110 mg, 533  $\mu\text{mol}$ , 53%).

$^1\text{H NMR}$  (500 MHz,  $\text{CDCl}_3$ )  $\delta$  4.30 – 4.24 (m, 6H), 3.71 (s, 3H).

$^{13}\text{C NMR}$  (126 MHz,  $\text{CDCl}_3$ )  $\delta$  177.3, 172.0, 56.0, 55.6, 51.8, 47.3, 47.2.

Spectral data in agreement with the literature.<sup>14</sup>

### 1-(2-Azidoethyl) 4-methyl cubane-1,4-dicarboxylate (S17)

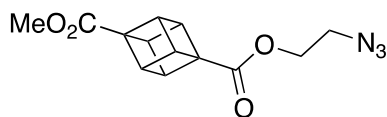

A flame-dried flask was charged with 4-(methoxycarbonyl)cubane-1-carboxylic acid (103 mg, 500  $\mu\text{mol}$ , 1.0 equiv), DMAP (8.6 mg, 70.0  $\mu\text{mol}$ , 14 mol %), EDCI (144 mg, 750  $\mu\text{mol}$ , 1.5 equiv), and  $\text{CH}_2\text{Cl}_2$  (2.5 mL). 2-Azidoethan-1-ol (47.9 mg, 550  $\mu\text{mol}$ , 1.1 equiv) was added and the mixture was stirred for 16 h at rt.  $\text{H}_2\text{O}$  (10 mL) was added, the organic phase was collected, and the aqueous phase was extracted with  $\text{CH}_2\text{Cl}_2$  ( $3 \times 10$  mL). The combined organic extracts were dried over  $\text{Na}_2\text{SO}_4$ , filtered, and concentrated in vacuo to afford the crude product. This was purified by flash column chromatography (silica, 0–20%  $\text{Et}_2\text{O}$  in hexane) to give the desired product as a white solid (71.8 mg, 261  $\mu\text{mol}$ , 52%).

$^1\text{H NMR}$  (700 MHz,  $\text{CDCl}_3$ )  $\delta$  4.30 (dd,  $J = 5.6, 4.6$  Hz, 2H), 4.28 – 4.21 (m, 6H), 3.70 (s, 3H), 3.49 – 3.44 (m, 2H).

$^{13}\text{C NMR}$  (176 MHz,  $\text{CDCl}_3$ )  $\delta$  172.0, 171.3, 63.5, 56.0, 55.7, 51.8, 49.9, 47.3, 47.2.

**IR (ATR, film)**  $\nu_{\max}$  2997, 2110, 2091, 1717, 1439, 1321, 1271, 1213, 1198, 1088, 1076, 1034, 924, 841, 829, 785  $\text{cm}^{-1}$ .

**HRMS (ESI)** Calculated for 276.0979  $m/z$ , found 276.0973  $m/z$  [ $\text{C}_{13}\text{H}_{13}\text{N}_3\text{O}_4+\text{H}$ ] $^+$ .

### Triethyl(ethynyl)germane (S18)

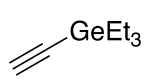 **GeEt<sub>3</sub>** A flame-dried flask was charged with chlorotriethylgermane (1.00 g, 5.12 mmol, 1.0 equiv) and Et<sub>2</sub>O (20 mL) under N<sub>2</sub>. Ethynylmagnesium bromide in THF (9.50 mL, 0.5 M, 4.75 mmol, 1.5 equiv) was added dropwise and the mixture was stirred at rt for two hours. The mixture was quenched by the addition of H<sub>2</sub>O (50 mL) and the organic phase was collected. The aqueous phase was extracted with Et<sub>2</sub>O (3 × 50 mL), and the combined organic extracts were dried over Na<sub>2</sub>SO<sub>4</sub>, filtered, and concentrated in vacuo to give the desired product as a yellow oil, which was used without further purification (850 mg, 4.60 mmol, 90%).

**<sup>1</sup>H NMR (400 MHz, CDCl<sub>3</sub>)**  $\delta$  2.27 (s, 1H), 1.16 – 1.06 (m, 9H), 0.88 (m, 6H).

**<sup>13</sup>C NMR (101 MHz, CDCl<sub>3</sub>)**  $\delta$  94.9, 87.9, 9.0, 5.7.

Spectral data in agreement with the literature.<sup>15</sup>

### Ethynyltriphenylgermane (S19)

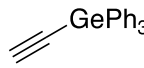 **GePh<sub>3</sub>** A flame-dried flask was charged with chlorotriphenylgermane (1.47 g, 4.33 mmol, 1.0 equiv) and Et<sub>2</sub>O (20 mL) under N<sub>2</sub>. Ethynylmagnesium bromide in THF (20.0 mL, 0.5 M, 10.0 mmol, 2.3 equiv) was added dropwise and the mixture was stirred at rt for two hours. The mixture was quenched by the addition of H<sub>2</sub>O (50 mL) and the organic phase was collected. The aqueous phase was extracted with Et<sub>2</sub>O (3 × 50 mL), and the combined organic extracts were dried over Na<sub>2</sub>SO<sub>4</sub>, filtered, and concentrated in vacuo to give the desired product as a white solid, which was used without further purification (1.42 g, 4.32 mmol, >99%).

**<sup>1</sup>H NMR (500 MHz, CDCl<sub>3</sub>)**  $\delta$  7.67 (d,  $J$  = 5.4 Hz, 6H), 7.51 – 7.40 (m, 9H), 2.68 (s, 1H).

**<sup>13</sup>C NMR (101 MHz, CDCl<sub>3</sub>)**  $\delta$  134.6, 133.9, 129.8, 128.6, 96.0, 84.9.

Spectral data in agreement with the literature.<sup>16</sup>

## 4. Product synthesis and characterisation data

### General Procedure E

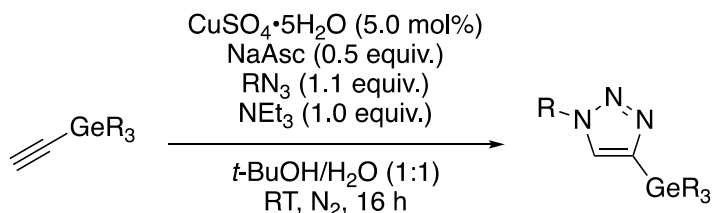

A HPLC vial was charged with sodium L-ascorbate (0.50 equiv),  $\text{CuSO}_4 \cdot 5\text{H}_2\text{O}$  (5.0 mol %), ethynylgermane (1.0 equiv – **if solid**) and azide (1.1 equiv – **if solid**). The vial was then evacuated and backfilled with  $\text{N}_2$  (3 ×), before adding a 1:1 mixture of *t*-BuOH/ $\text{H}_2\text{O}$  (0.25 M). To this was added triethylamine (1.0 equiv), followed by azide (1.1 equiv – **if liquid**), and ethynylgermane (1.0 equiv – **if liquid**), and the resulting mixture was stirred at rt under  $\text{N}_2$  for 16 h. After this, the reaction was quenched with 10% aq.  $\text{NH}_3$  solution (25 mL per mmol alkyne) and extracted with  $\text{CH}_2\text{Cl}_2$  (3 × 25 mL per mmol alkyne), dried over  $\text{Na}_2\text{SO}_4$ , filtered, and concentrated in vacuo. NMR yield was then determined from the crude reaction mixture through comparison to a TCE (1.0 equiv) internal standard. Respective purification methods are disclosed below.

### 2-((4-(Triphenylgermyl)-1*H*-1,2,3-triazol-1-yl)methyl)pyridine (1)

Prepared according to **General Procedure E** using ethynyltriphenylgermane (65.8 mg, 200  $\mu\text{mol}$ , 1.0 equiv) and 2-(azidomethyl)pyridine (29.5 mg, 220  $\mu\text{mol}$ , 1.1 equiv) to afford the crude product. This was purified by flash column chromatography (silica, 10% EtOAc in hexane, followed by acetone flush) to give the desired product as a yellow solid (78.8 mg, 170  $\mu\text{mol}$ , 85%).

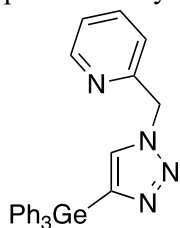

$^1\text{H NMR}$  (500 MHz,  $\text{CDCl}_3$ )  $\delta$  8.56 (ddd,  $J = 4.9, 1.8, 0.9$  Hz, 1H), 7.70 (s, 1H), 7.67 (td,  $J = 7.7, 1.8$  Hz, 1H), 7.63 – 7.56 (m, 6H), 7.44 – 7.34 (m, 9H), 7.24 (ddd,  $J = 7.7, 4.9, 1.1$  Hz, 1H), 7.17 (dt,  $J = 7.8, 1.1$  Hz, 1H), 5.71 (s, 2H).

$^{13}\text{C NMR}$  (126 MHz,  $\text{CDCl}_3$ )  $\delta$  143.4, 135.4, 135.3, 135.2, 135.1, 130.4, 129.5, 129.2, 128.7, 128.5, 128.0, 53.8.

**IR** (ATR, film)  $\nu_{\text{max}}$  3067, 3049, 1485, 1431, 1193, 1092, 1045, 997  $\text{cm}^{-1}$ .

**HRMS** (ESI) Calculated for 465.1129  $m/z$ , found 465.1139  $m/z$  [ $\text{C}_{26}\text{H}_{22}\text{GeN}_4\text{H}$ ] $^+$ .

### 1-(2-Nitrobenzyl)-4-(triphenylgermyl)-1*H*-1,2,3-triazole (2)

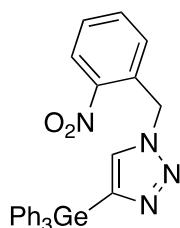

Prepared according to **General Procedure E** using ethynyltriphenylgermane (65.8 mg, 200  $\mu\text{mol}$ , 1.0 equiv) and 1-(azidomethyl)-2-nitrobenzene (57.0 mg, 220  $\mu\text{mol}$ , 1.1 equiv) to afford the crude product. This was purified by flash column chromatography (silica, 0–50% EtOAc in hexane) to give the desired product as a pale-yellow solid (56.6 mg, 112  $\mu\text{mol}$ , 56%).

$^1\text{H NMR}$  (700 MHz,  $\text{CDCl}_3$ )  $\delta$  8.13 (dd,  $J = 8.1, 1.3$  Hz, 1H), 7.70 (s, 1H), 7.64 – 7.57 (m, 7H), 7.51 (td,  $J = 7.8, 1.4$  Hz, 1H), 7.44 – 7.36 (m, 9H), 7.04 (dd,  $J = 7.8, 1.4$  Hz, 1H), 5.99 (s, 2H).

$^{13}\text{C NMR}$  (176 MHz,  $\text{CDCl}_3$ )  $\delta$  147.5, 143.8, 135.2, 135.2, 134.5, 131.6, 131.2, 130.3, 129.6, 129.6, 128.6, 125.5, 50.5.

**IR (ATR, film)**  $\nu_{\max}$  1528, 1485, 1431, 1341, 1265, 1094, 1044  $\text{cm}^{-1}$ .

**HRMS (ESI)** Calculated for 509.1027  $m/z$ , found 509.1031  $m/z$  [ $\text{C}_{27}\text{H}_{22}\text{GeN}_4\text{O}_2+\text{H}$ ] $^+$ .

### 1-(2-Iodobenzyl)-4-(triphenylgermyl)-1*H*-1,2,3-triazole (3)

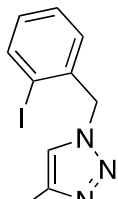

Prepared according to **General Procedure E** using ethynyltriphenylgermane (65.8 mg, 200  $\mu\text{mol}$ , 1.0 equiv) and 1-(azidomethyl)-2-iodobenzene (57.0 mg, 220  $\mu\text{mol}$ , 1.1 equiv) to afford the crude product. This was purified by flash column chromatography (silica, 0–30% EtOAc in hexane) to give the desired product as a white, waxy solid (82.8 mg, 141  $\mu\text{mol}$ , 70%).

**$^1\text{H}$  NMR (500 MHz,  $\text{CDCl}_3$ )**  $\delta$  7.87 (d,  $J = 7.9$  Hz, 1H), 7.65 – 7.57 (m, 7H), 7.44 – 7.35 (m, 9H), 7.32 (t,  $J = 7.6$  Hz, 1H), 7.08 – 6.98 (m, 2H), 5.66 (s, 2H).

**$^{13}\text{C}$  NMR (126 MHz,  $\text{CDCl}_3$ )**  $\delta$  143.3, 139.9, 137.7, 135.4, 135.3, 134.3, 131.0, 130.4, 129.5, 129.2, 128.5, 98.4, 58.1.

**IR (ATR, film)**  $\nu_{\max}$  3048, 1483, 1431, 1308, 1265, 1188, 1092, 1044, 1015, 997, 814  $\text{cm}^{-1}$ .

**HRMS (ESI)** Calculated for 590.0143  $m/z$ , found 590.0147  $m/z$  [ $\text{C}_{27}\text{H}_{22}\text{GeN}_3\text{I}+\text{H}$ ] $^+$ .

### 1-(4-Fluorobenzyl)-4-(triphenylgermyl)-1*H*-1,2,3-triazole (4)

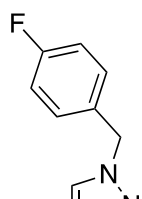

Prepared according to **General Procedure E** using ethynyltriphenylgermane (65.8 mg, 200  $\mu\text{mol}$ , 1.0 equiv) and 4-fluorobenzyl azide (33.3 mg, 220  $\mu\text{mol}$ , 1.1 equiv) to afford the crude product. This was purified by flash column chromatography (silica, 10% EtOAc in hexane, followed by acetone flush) to give the desired product as a white solid (52.3 mg, 109  $\mu\text{mol}$ , 55%).

**$^1\text{H}\{^{19}\text{F}\}$  NMR (500 MHz,  $\text{CDCl}_3$ )**  $\delta$  7.60 – 7.56 (m, 6H), 7.46 (s, 1H), 7.43 – 7.35 (m, 9H), 7.26 – 7.21 (m, 2H), 7.07 – 7.01 (m, 2H), 5.54 (s, 2H).

**$^{13}\text{C}$  NMR (126 MHz,  $\text{CDCl}_3$ )**  $\delta$  162.9 (d,  $^1J_{\text{CF}} = 248.0$  Hz), 143.6, 135.3, 135.2, 130.9 (d,  $^4J_{\text{CF}} = 3.9$  Hz), 130.2, 130.0 (d,  $^3J_{\text{CF}} = 8.7$  Hz), 129.5, 128.5, 116.2 (d,  $^2J_{\text{CF}} = 22.1$  Hz), 53.1.

**$^{19}\text{F}\{^1\text{H}\}$  NMR (470 MHz,  $\text{CDCl}_3$ )**  $\delta$  -112.96.

**IR (ATR, film)**  $\nu_{\max}$  3069, 3048, 2320, 1653, 1508, 1431, 1225, 1094, 1045, 841, 772  $\text{cm}^{-1}$ .

**HRMS (ESI)** Calculated for 482.1082  $m/z$ , found 482.1081  $m/z$  [ $\text{C}_{27}\text{H}_{21}\text{FGeN}_3+\text{H}$ ] $^+$ .

### 1-(4-(4,4,5,5-Tetramethyl-1,3,2-dioxaborolan-2-yl)benzyl)-4-(triphenylgermyl)-1*H*-1,2,3-triazole (5)

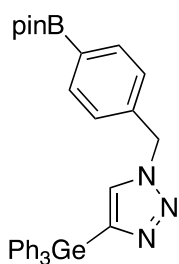

Prepared according to **General Procedure E** using ethynyltriphenylgermane (32.9 mg, 100  $\mu\text{mol}$ , 1.0 equiv) and 2-(4-(azidomethyl)phenyl)-4,4,5,5-tetramethyl-1,3,2-dioxaborolane (28.5 mg, 110  $\mu\text{mol}$ , 1.1 equiv) with the addition of CsF (30.4 mg, 200  $\mu\text{mol}$ , 2.0 equiv) to afford the crude product. This was purified by flash column chromatography (silica, 0–20% EtOAc in hexane) to give the desired product as a white solid (36.1 mg, 61.4  $\mu\text{mol}$ , 61%).

$^1\text{H}$  NMR (500 MHz,  $\text{CDCl}_3$ )  $\delta$  7.79 (d,  $J = 7.6$  Hz, 2H), 7.60 – 7.55 (m, 6H), 7.45 (s, 1H), 7.42 – 7.33 (m, 9H), 7.24 (d,  $J = 7.7$  Hz, 2H), 5.59 (s, 2H), 1.34 (s, 12H).

$^{13}\text{C}$  NMR (126 MHz,  $\text{CDCl}_3$ )  $\delta$  143.5, 137.9, 135.6, 135.4, 135.2, 130.3, 129.5, 128.5, 127.3, 84.1, 53.8, 25.0.

$^{11}\text{B}$  NMR (128 MHz,  $\text{CDCl}_3$ )  $\delta$  31.8.

IR (ATR, film)  $\nu_{\text{max}}$  2978, 1614, 1485, 1431, 1360, 1323, 1267, 1142, 1090, 1045, 858  $\text{cm}^{-1}$ .

HRMS (ESI) Calculated for 590.2029  $m/z$ , found 590.2029  $m/z$  [ $\text{C}_{33}\text{H}_{34}\text{BGeN}_3\text{O}_2 + \text{H}$ ] $^+$ .

### 1-(4-Fluorophenyl)-4-(triphenylgermyl)-1*H*-1,2,3-triazole (6)

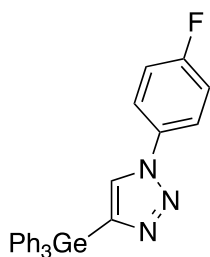

Prepared according to **General Procedure E** using ethynyltriphenylgermane (65.8 mg, 200  $\mu\text{mol}$ , 1.0 equiv) and 4-fluorophenyl azide (24.7  $\mu\text{L}$ , 220  $\mu\text{mol}$ , 1.1 equiv) to afford the crude product. This was purified by flash column chromatography (silica, 10–20% EtOAc in hexane, followed by acetone flush) to give the desired product as a pale yellow solid (84.8 mg, 182  $\mu\text{mol}$ , 91%).

$^1\text{H}\{^{19}\text{F}\}$  NMR (500 MHz,  $\text{CDCl}_3$ )  $\delta$  7.89 (s, 1H), 7.75 – 7.68 (m, 2H), 7.67 – 7.63 (m, 6H), 7.47 – 7.37 (m, 9H), 7.22 – 7.16 (m, 2H).

$^{13}\text{C}$  NMR (126 MHz,  $\text{CDCl}_3$ )  $\delta$  162.5 (d,  $^1J_{\text{CF}} = 248.8$  Hz), 144.2, 135.3, 135.1, 133.5, 129.7, 128.7, 128.6, 122.8 (d,  $^3J_{\text{CF}} = 8.9$  Hz), 116.8 (d,  $^2J_{\text{CF}} = 23.4$  Hz).

$^{19}\text{F}\{^1\text{H}\}$  NMR (470 MHz,  $\text{CDCl}_3$ )  $\delta$  -112.41.

IR (ATR, film)  $\nu_{\text{max}}$  3134, 2924, 2320, 1558, 1516, 1431, 1094, 1038, 847, 750  $\text{cm}^{-1}$ .

HRMS (ESI) Calculated for 468.0926  $m/z$ , found 468.0928  $m/z$  [ $\text{C}_{26}\text{H}_{20}\text{FGeN}_3 + \text{H}$ ] $^+$ .

### 1-(*p*-Tolyl)-4-(triphenylgermyl)-1*H*-1,2,3-triazole (7)

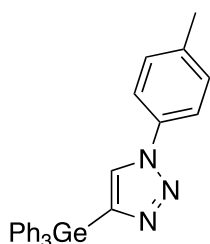

Prepared according to **General Procedure E** using ethynyltriphenylgermane (65.8 mg, 200  $\mu\text{mol}$ , 1.0 equiv) and *p*-tolyl azide (29.3 mg, 220  $\mu\text{mol}$ , 1.1 equiv) to afford the crude product. This was purified by flash column chromatography (silica, 10% EtOAc in hexane) to give the desired product as a yellow oil (86.2 mg, 187  $\mu\text{mol}$ , 93%).



**<sup>1</sup>H NMR (500 MHz, CDCl<sub>3</sub>)** δ 7.90 (s, 1H), 7.67 – 7.63 (m, 6H), 7.62 – 7.59 (m, 2H), 7.47 – 7.35 (m, 9H), 7.29 (d, *J* = 8.3 Hz, 2H), 2.41 (s, 3H).

**<sup>13</sup>C NMR (126 MHz, CDCl<sub>3</sub>)** δ 143.7, 138.8, 135.3, 135.3, 134.9, 130.3, 129.6, 128.6, 128.5, 120.8, 21.2.

**IR (ATR, film)**  $\nu_{\max}$  3067, 3048, 2922, 1558, 1520, 1432, 1094, 1036, 816 cm<sup>-1</sup>.

**HRMS (ESI)** Calculated for 464.1177 *m/z*, found 464.1178 *m/z* [C<sub>27</sub>H<sub>23</sub>GeN<sub>3</sub>+H]<sup>+</sup>.

#### (*E*)-1-Styryl-4-(triphenylgermyl)-1*H*-1,2,3-triazole (8)

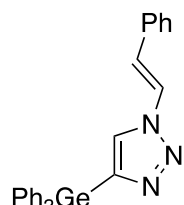

Prepared according to **General Procedure E** using ethynyltriphenylgermane (65.8 mg, 200 μmol, 1.0 equiv) and (*E*)-(2-azidovinyl)benzene (31.9 mg, 220 μmol, 1.1 equiv) to afford the crude product. This was purified by flash column chromatography (silica, 0–30% EtOAc in hexane) to give the desired product as a yellow solid (86.3 mg, 182 μmol, 91%).

**<sup>1</sup>H NMR (700 MHz, CDCl<sub>3</sub>)** δ 7.85 (s, 1H), 7.83 (d, *J* = 14.7 Hz, 1H), 7.70 – 7.64 (m, 6H), 7.48 – 7.40 (m, 11H), 7.39 (t, *J* = 7.6 Hz, 2H), 7.36 – 7.31 (m, 1H), 7.16 (d, *J* = 14.7 Hz, 1H).

**<sup>13</sup>C NMR (176 MHz, CDCl<sub>3</sub>)** δ 143.6, 135.2, 135.0, 133.8, 129.6, 129.1, 128.7, 128.5, 127.8, 126.7, 122.9, 121.7.

**IR (ATR, film)**  $\nu_{\max}$  3051, 1655, 1485, 1431, 1265, 1200, 1186, 1092, 1028, 941 cm<sup>-1</sup>.

**HRMS (ESI)** Calculated for 476.1177 *m/z*, found 476.1185 *m/z* [C<sub>28</sub>H<sub>23</sub>GeN<sub>3</sub>+H]<sup>+</sup>.

#### 2-(4-(Triphenylgermyl)-1*H*-1,2,3-triazol-1-yl)ethan-1-ol (9)

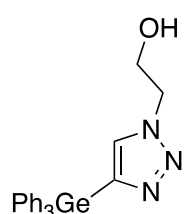

Prepared according to **General Procedure E** using ethynyltriphenylgermane (65.8 mg, 200 μmol, 1.0 equiv) and 2-azidoethan-1-ol (19.2 mg, 220 μmol, 1.1 equiv) to afford the crude product. This was purified by flash column chromatography (silica, 0–100% EtOAc in hexane) to give the desired product as a white solid (37.5 mg, 90.1 μmol, 45%).

**<sup>1</sup>H NMR (700 MHz, CDCl<sub>3</sub>)** δ 7.66 – 7.54 (m, 7H), 7.52 – 7.32 (m, 9H), 4.52 – 4.47 (m, 2H), 4.07 (q, *J* = 5.0 Hz, 2H), 2.46 (t, *J* = 5.8 Hz, 1H).

**<sup>13</sup>C NMR (176 MHz, CDCl<sub>3</sub>)** δ 142.7, 135.2, 135.1, 131.5, 129.5, 128.4, 61.1, 52.2.

**IR (ATR, film)**  $\nu_{\max}$  1485, 1431, 1200, 1188, 1092, 1057, 1026, 999 cm<sup>-1</sup>.

**HRMS (ESI)** Calculated for 418.0969 *m/z*, found 418.0963 *m/z* [C<sub>22</sub>H<sub>21</sub>GeN<sub>3</sub>O+H]<sup>+</sup>.

### *N*-(Pyrimidin-2-yl)-4-(4-(triphenylgermyl)-1*H*-1,2,3-triazol-1-yl)benzenesulfonamide (10)

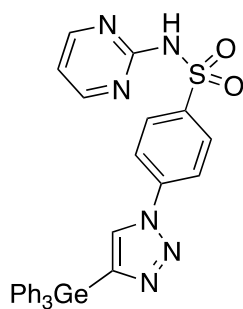

Prepared according to **General Procedure E** using ethynyltriphenylgermane (65.8 mg, 200  $\mu\text{mol}$ , 1.0 equiv) and 4-azido-*N*-(pyrimidin-2-yl)benzenesulfonamide (60.8 mg, 220  $\mu\text{mol}$ , 1.1 equiv) to afford the crude product. This was purified by flash column chromatography (silica, 0–100% EtOAc in hexane) to give the desired product as a pale-yellow solid (23.0 mg, 38.1  $\mu\text{mol}$ , 19%).

$^1\text{H NMR}$  (400 MHz,  $\text{CDCl}_3$ )  $\delta$  10.96 (s, 1H), 8.61 (d,  $J = 5.0$  Hz, 2H), 8.33 – 8.25 (m, 2H), 7.98 (s, 1H), 7.95 – 7.87 (m, 2H), 7.66 – 7.57 (m, 6H), 7.48 – 7.36 (m, 9H), 7.00 (t,  $J = 4.9$  Hz, 1H).

$^{13}\text{C NMR}$  (176 MHz,  $\text{CDCl}_3$ )  $\delta$  158.8, 156.7, 145.1, 140.3, 139.4, 135.2, 134.8, 130.6, 129.8, 128.7, 128.4, 120.4, 116.2.

**IR** (ATR, film)  $\nu_{\text{max}}$  1580, 1505, 1485, 1431, 1410, 1344, 1163, 1092, 1030, 947, 801  $\text{cm}^{-1}$ .

**HRMS** (ESI) Calculated for 607.0966  $m/z$ , found 607.0969  $m/z$  [ $\text{C}_{30}\text{H}_{24}\text{GeN}_6\text{O}_2\text{S}+\text{H}$ ] $^+$ .

### 10-(4-(2-(4-(Triphenylgermyl)-1*H*-1,2,3-triazol-1-yl)ethoxy)phenyl)-10*H*-phenothiazine (11)

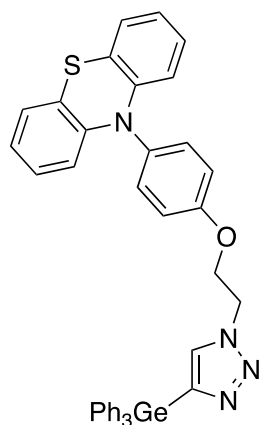

Prepared according to **General Procedure E** using ethynyltriphenylgermane (65.8 mg, 200  $\mu\text{mol}$ , 1.0 equiv) and 10-(4-(2-azidoethoxy)phenyl)-10*H*-phenothiazine (79.3 mg, 220  $\mu\text{mol}$ , 1.1 equiv) to afford the crude product. This was purified by flash column chromatography (silica, 0–100% EtOAc in hexane) to give the desired product as an off-white solid (61.9 mg, 89.8  $\mu\text{mol}$ , 45%).

$^1\text{H NMR}$  (500 MHz,  $\text{CDCl}_3$ )  $\delta$  7.78 (s, 1H), 7.65 – 7.59 (m, 6H), 7.45 – 7.35 (m, 9H), 7.31 – 7.27 (m, 2H), 7.03 – 6.97 (m, 4H), 6.85 – 6.75 (m, 4H), 6.21 – 6.08 (m, 2H), 4.86 (t,  $J = 5.0$  Hz, 2H), 4.44 (t,  $J = 5.1$  Hz, 2H).

$^{13}\text{C NMR}$  (126 MHz,  $\text{CDCl}_3$ ) 157.6, 144.6, 143.2, 135.3, 135.3, 134.4, 132.6, 131.9, 129.6, 128.5, 127.0, 126.8, 122.5, 119.9, 116.6, 115.8, 66.9, 49.4.

**IR** (ATR, film)  $\nu_{\text{max}}$  1605, 1508, 1460, 1443, 1429, 1300, 1237, 1094, 1038, 1028, 909  $\text{cm}^{-1}$ .

**HRMS** (ESI) Calculated for 691.1581  $m/z$ , found 691.1583  $m/z$  [ $\text{C}_{40}\text{H}_{32}\text{GeN}_4\text{OS}+\text{H}$ ] $^+$ .

### 4-(2-(4-(Triphenylgermyl)-1*H*-1,2,3-triazol-1-yl)ethoxy)-2*H*-chromen-2-one (12)

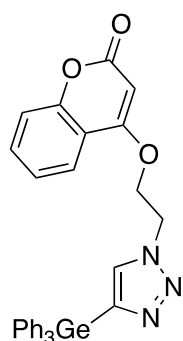

Prepared according to **General Procedure E** using ethynyltriphenylgermane (65.8 mg, 200  $\mu\text{mol}$ , 1.0 equiv) and 4-(2-azidoethoxy)-2*H*-chromen-2-one (50.9 mg, 220  $\mu\text{mol}$ , 1.1 equiv) to afford the crude product. This was purified by flash column chromatography (silica, 0–60% EtOAc in hexane) to give the desired product as a white solid (37.5 mg, 66.9  $\mu\text{mol}$ , 33%).

$^1\text{H NMR}$  (500 MHz,  $\text{CDCl}_3$ )  $\delta$  7.68 (s, 1H), 7.61 – 7.52 (m, 8H), 7.43 – 7.37 (m, 3H), 7.37 – 7.29 (m, 7H), 7.16 (ddd,  $J = 8.2, 7.4, 1.1$  Hz, 1H), 5.66 (s, 1H), 4.93 (d,  $J = 5.1$  Hz, 2H), 4.53 (t,  $J = 5.1$  Hz, 2H).

$^{13}\text{C}$  NMR (126 MHz,  $\text{CDCl}_3$ )  $\delta$  164.7, 162.3, 153.4, 143.8, 135.2, 135.1, 132.8, 131.4, 129.6, 128.6, 124.3, 122.7, 117.1, 115.2, 91.4, 67.3, 48.5.

IR (ATR, film)  $\nu_{\text{max}}$  2986, 1972, 2901, 1721, 1624, 1431, 1379, 1240, 1109, 1092, 1047, 1028  $\text{cm}^{-1}$ .

HRMS (ESI) Calculated for 562.1181  $m/z$ , found 562.1178  $m/z$  [ $\text{C}_{31}\text{H}_{25}\text{GeN}_3\text{O}_3+\text{H}$ ] $^+$ .

### 1-Phenyl-2-(4-(triphenylgermyl)-1*H*-1,2,3-triazol-1-yl)ethan-1-one (13)

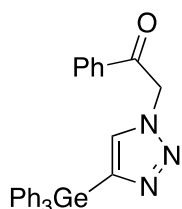

Prepared according to **General Procedure E** using ethynyltriphenylgermane (65.8 mg, 200  $\mu\text{mol}$ , 1.0 equiv) and 2-azido-1-phenylethan-1-one (35.5 mg, 220  $\mu\text{mol}$ , 1.1 equiv) to afford the crude product. This was purified by flash column chromatography (silica, 0–100% EtOAc in hexane) to give the desired product as a pale-yellow solid (78.7 mg, 161  $\mu\text{mol}$ , 80%).

$^1\text{H}$  NMR (500 MHz,  $\text{CDCl}_3$ )  $\delta$  8.01 – 7.96 (m, 2H), 7.70 (s, 1H), 7.69 – 7.64 (m, 1H), 7.64 – 7.60 (m, 6H), 7.57 – 7.51 (m, 2H), 7.45 – 7.32 (m, 9H), 5.90 (s, 2H).

$^{13}\text{C}$  NMR (126 MHz,  $\text{CDCl}_3$ )  $\delta$  190.5, 143.4, 135.4, 135.3, 134.7, 134.2, 132.4, 129.5, 129.3, 128.5, 128.3, 55.1.

IR (ATR, film)  $\nu_{\text{max}}$  1703, 1485, 1451, 1431, 1231, 1092, 1055, 995  $\text{cm}^{-1}$ .

HRMS (ESI) Calculated for 492.1126  $m/z$ , found 492.1133  $m/z$  [ $\text{C}_{28}\text{H}_{23}\text{GeN}_3\text{O}+\text{H}$ ] $^+$ .

### 1-Benzyl-4-(triphenylgermyl)-1*H*-1,2,3-triazole (14)

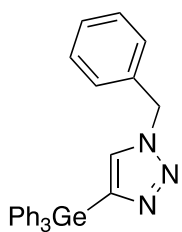

Prepared according to **General Procedure E** using triethyl(ethynyl)germane (37.0 mg, 200  $\mu\text{mol}$ , 1.0 equiv) and benzyl azide (27.5  $\mu\text{L}$ , 220  $\mu\text{mol}$ , 1.1 equiv) to afford the crude product. This was purified by flash column chromatography (silica, 30% EtOAc in hexane) to give the desired product as a white solid (49.6 mg, 107  $\mu\text{mol}$ , 54%).

$^1\text{H}$  NMR (500 MHz,  $\text{CDCl}_3$ )  $\delta$  7.61 – 7.55 (m, 6H), 7.48 (s, 1H), 7.44 – 7.31 (m, 12H), 7.26 – 7.22 (m, 2H), 5.58 (s, 2H).

$^{13}\text{C}$  NMR (126 MHz,  $\text{CDCl}_3$ )  $\delta$  143.4, 135.4, 135.2, 135.1, 130.4, 129.5, 129.2, 128.7, 128.5, 128.0, 53.8.

IR (ATR, film)  $\nu_{\text{max}}$  3067, 3049, 1485, 1456, 1429, 1192, 1092, 1045, 1028, 999  $\text{cm}^{-1}$ .

HRMS (ESI) Calculated for 464.1177  $m/z$ , found 464.1179  $m/z$  [ $\text{C}_{27}\text{H}_{23}\text{GeN}_3+\text{H}$ ] $^+$ .

### 1-Benzyl-4-(triethylgermyl)-1*H*-1,2,3-triazole (15)

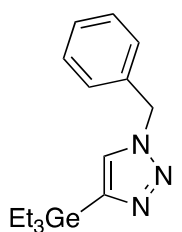

Prepared according to **General Procedure E** using triethyl(ethynyl)germane (92.4 mg, 500  $\mu\text{mol}$ , 1.0 equiv) and benzyl azide (73.2 mg, 550  $\mu\text{mol}$ , 1.1 equiv) to afford the crude product. This was purified by flash column chromatography (silica, 0–20% EtOAc in hexane) to give the desired product as a white solid (157 mg, 494  $\mu\text{mol}$ , 99%).

$^1\text{H}$  NMR (500 MHz,  $\text{CDCl}_3$ )  $\delta$  7.42 – 7.32 (m, 4H), 7.24 (dd,  $J = 7.9, 1.7$  Hz, 2H), 5.57 (s, 2H), 1.12 – 0.92 (m, 15H).

$^{13}\text{C}$  NMR (126 MHz,  $\text{CDCl}_3$ )  $\delta$  145.0, 135.2, 129.0, 128.5, 128.4, 127.9, 53.5, 8.9, 4.5.

IR (ATR, film)  $\nu_{\text{max}}$  2949, 2930, 2905, 2870, 1497, 1456, 1190, 1098, 1045, 1022  $\text{cm}^{-1}$ .

HRMS (ESI) Calculated for 320.1177  $m/z$ , found 320.1190  $m/z$  [ $\text{C}_{15}\text{H}_{23}\text{GeN}_3+\text{H}$ ] $^+$ .

### 1-Benzyl-4-(dimethyl(*o*-tolyl)germyl)-1*H*-1,2,3-triazole (16)

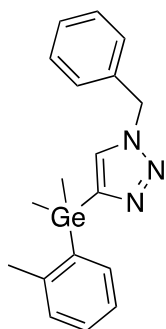

Prepared according to **General Procedure E** using ethynyldimethyl(*o*-tolyl)germane (43.8 mg, 200  $\mu\text{mol}$ , 1.0 equiv) and benzyl azide (27.5  $\mu\text{L}$ , 220  $\mu\text{mol}$ , 1.1 equiv) to afford the crude product. This was purified by flash column chromatography (silica, 30% EtOAc in hexane) to give the desired product as a colourless oil (42.5 mg, 121  $\mu\text{mol}$ , 60%).

$^1\text{H}$  NMR (500 MHz,  $\text{CDCl}_3$ )  $\delta$  7.43 – 7.30 (m, 5H), 7.29 – 7.21 (m, 3H), 7.18 – 7.11 (m, 2H), 5.56 (s, 2H), 2.37 (s, 3H), 0.74 (s, 6H).

$^{13}\text{C}$  NMR (126 MHz,  $\text{CDCl}_3$ )  $\delta$  146.6, 143.3, 137.7, 135.1, 134.1, 130.0, 129.4, 129.2, 128.7, 128.6, 128.1, 125.3, 53.7, 23.2, –1.5.

IR (ATR, film)  $\nu_{\text{max}}$  2911, 2311, 1558, 1456, 1192, 1045, 806  $\text{cm}^{-1}$ .

HRMS (ESI) Calculated for 376.0840  $m/z$ , found 376.0835  $m/z$  [ $\text{C}_{18}\text{H}_{21}\text{GeN}_3+\text{Na}$ ] $^+$ .

### 1-Benzyl-4-(benzyl(dimethyl)germyl)-1*H*-1,2,3-triazole (17)

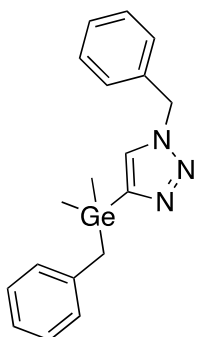

Prepared according to **General Procedure E** using benzyl(ethynyl)dimethylgermane (43.8 mg, 200  $\mu\text{mol}$ , 1.0 equiv) and benzyl azide (27.5  $\mu\text{L}$ , 220  $\mu\text{mol}$ , 1.1 equiv) to afford the crude product. This was purified by flash column chromatography (silica, 30% EtOAc in hexane) to give the desired product as a colourless oil (35.8 mg, 102  $\mu\text{mol}$ , 51%).

$^1\text{H}$  NMR (500 MHz,  $\text{CDCl}_3$ )  $\delta$  7.42 – 7.32 (m, 3H), 7.22 (dd,  $J = 7.4, 2.1$  Hz, 2H), 7.14 – 7.09 (m, 3H), 7.02 (t,  $J = 7.3$  Hz, 1H), 6.95 – 6.90 (m, 2H), 5.52 (s, 2H), 2.48 (s, 2H), 0.40 (s, 6H).

$^{13}\text{C}$  NMR (126 MHz,  $\text{CDCl}_3$ )  $\delta$  146.0, 140.2, 135.1, 129.2, 128.7, 128.4, 128.3, 128.1, 128.0, 124.3, 53.7, 25.4, –3.5.

IR (ATR, film)  $\nu_{\text{max}}$  3024, 2909, 2311, 1491, 1456, 1192, 1045, 808, 758  $\text{cm}^{-1}$ .

HRMS (ESI) Calculated for 354.1020  $m/z$ , found 354.1025  $m/z$  [ $\text{C}_{18}\text{H}_{21}\text{GeN}_3+\text{H}$ ] $^+$ .

### 1-Methyl 4-(2-(4-(triethylgermyl)-1*H*-1,2,3-triazol-1-yl)ethyl) cubane-1,4-dicarboxylate (18)

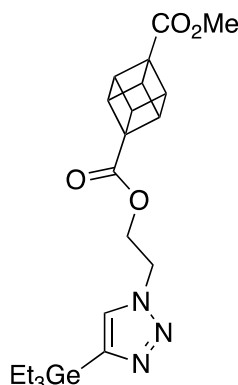

Prepared according to **General Procedure E** using triethyl(ethynyl)germane (37.0 mg, 200  $\mu\text{mol}$ , 1.0 equiv) and 1-(2-azidoethyl) 4-methylcubane-1,4-dicarboxylate (60.6 mg, 220  $\mu\text{mol}$ , 1.1 equiv) to afford the crude product. This was purified by flash column chromatography (silica, 0–20% EtOAc in hexane) to give the desired product as a white solid (15.9 mg, 50.0  $\mu\text{mol}$ , 25%).

$^1\text{H NMR}$  (500 MHz,  $\text{CDCl}_3$ )  $\delta$  7.49 (s, 1H), 4.67 (t,  $J = 5.4$  Hz, 2H), 4.50 (t,  $J = 5.3$  Hz, 2H), 4.25 – 4.15 (m, 6H), 3.70 (s, 3H), 1.14 – 0.98 (m, 15H).

$^{13}\text{C NMR}$  (126 MHz,  $\text{CDCl}_3$ )  $\delta$  171.9, 170.9, 144.8, 129.2, 62.6, 56.0, 55.6, 51.8, 48.5, 47.2, 47.1, 9.0, 4.7.

**IR (ATR, film)**  $\nu_{\text{max}}$  2951, 1721, 1435, 1319, 1217, 1192, 1088, 841  $\text{cm}^{-1}$ .

**HRMS (ESI)** Calculated for 462.1443  $m/z$ , found 462.1434  $m/z$  [ $\text{C}_{21}\text{H}_{29}\text{GeN}_3\text{O}_4 + \text{H}$ ] $^+$ .

### 1-(*p*-Tolyl)-4-(triethylgermyl)-1*H*-1,2,3-triazole (19)

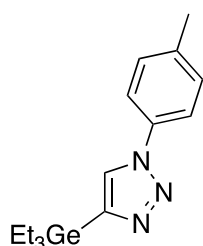

Prepared according to **General Procedure E** using triethyl(ethynyl)germane (37.0 mg, 200  $\mu\text{mol}$ , 1.0 equiv) and *p*-tolyl azide (29.3 mg, 220  $\mu\text{mol}$ , 1.1 equiv) to afford the crude product. This was purified by flash column chromatography (silica, 10% EtOAc in hexane) to give the desired product as a yellow oil (30.4 mg, 95.6  $\mu\text{mol}$ , 48%).

$^1\text{H NMR}$  (500 MHz,  $\text{CDCl}_3$ )  $\delta$  7.86 (s, 1H), 7.62 (d,  $J = 8.2$  Hz, 2H), 7.29 (d,  $J = 8.1$  Hz, 2H), 2.41 (s, 3H), 1.16 – 1.03 (m, 15H).

$^{13}\text{C NMR}$  (126 MHz,  $\text{CDCl}_3$ )  $\delta$  145.3, 138.5, 135.1, 130.3, 126.7, 120.7, 21.2, 9.1, 4.7.

**IR (ATR, film)**  $\nu_{\text{max}}$  2949, 2930, 2870, 1520, 1456, 1198, 1034, 980, 816, 799  $\text{cm}^{-1}$ .

**HRMS (ESI)** Calculated for 320.1177  $m/z$ , found 320.1183  $m/z$  [ $\text{C}_{15}\text{H}_{23}\text{GeN}_3 + \text{H}$ ] $^+$ .

### 1-Methyl 3-(2-(4-(triethylgermyl)-1*H*-1,2,3-triazol-1-yl)ethyl) bicyclo[1.1.1]pentane-1,3-dicarboxylate (20)

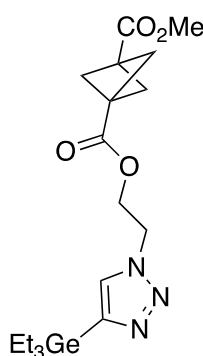

Prepared according to **General Procedure E** using triethyl(ethynyl)germane (37.0 mg, 200  $\mu\text{mol}$ , 1.0 equiv) and 1-(2-azidoethyl) 3-methyl bicyclo[1.1.1]pentane-1,3-dicarboxylate (52.6 mg, 220  $\mu\text{mol}$ , 1.1 equiv) to afford the crude product. This was purified by flash column chromatography (silica, 10–40% EtOAc in hexane, followed by acetone flush) to give the desired product as a colourless oil (34.7 mg, 81.8  $\mu\text{mol}$ , 41%).

$^1\text{H NMR}$  (500 MHz,  $\text{CDCl}_3$ )  $\delta$  7.48 (s, 1H), 4.66 (t,  $J = 5.3$  Hz, 2H), 4.47 (t,  $J = 5.3$  Hz, 2H), 3.68 (s, 3H), 2.27 (s, 6H), 1.09 – 1.02 (m, 15H).

$^{13}\text{C NMR}$  (126 MHz,  $\text{CDCl}_3$ )  $\delta$  169.5, 168.6, 144.9, 129.2, 62.9, 52.9, 52.0, 48.3, 37.8, 37.5, 9.1, 4.6.

**IR (ATR, film)**  $\nu_{\text{max}}$  2953, 2872, 2311, 1734, 1506, 1288, 1209, 1045  $\text{cm}^{-1}$ .

**HRMS (ESI)** Calculated for 426.1443  $m/z$ , found 426.1452  $m/z$  [ $\text{C}_{18}\text{H}_{29}\text{GeN}_3\text{O}_4 + \text{H}$ ] $^+$ .

### 1-(4-(4,4,5,5-Tetramethyl-1,3,2-dioxaborolan-2-yl)benzyl)-4-(triethylgermyl)-1H-1,2,3-triazole (21)

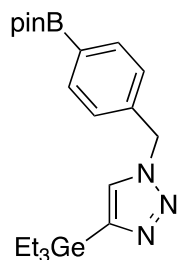

Prepared according to **General Procedure E** using triethyl(ethynyl)germane (37.0 mg, 200  $\mu\text{mol}$ , 1.0 equiv) and 2-(4-(azidomethyl)phenyl)-4,4,5,5-tetramethyl-1,3,2-dioxaborolane (57.0 mg, 220  $\mu\text{mol}$ , 1.1 equiv) with the addition of CsF (60.8 mg, 400  $\mu\text{mol}$ , 2.0 equiv) to afford the crude product. This was purified by flash column chromatography (silica, 0–20% EtOAc in hexane) to give the desired product as a white solid (65.7 mg, 148  $\mu\text{mol}$ , 74%).

$^1\text{H NMR}$  (400 MHz,  $\text{CDCl}_3$ )  $\delta$  7.80 (d,  $J$  = 8.1 Hz, 2H), 7.35 (s, 1H), 7.23 (d,  $J$  = 8.0 Hz, 2H), 5.58 (s, 2H), 1.34 (s, 12H), 1.07 – 0.97 (m, 15H).

$^{13}\text{C NMR}$  (101 MHz,  $\text{CDCl}_3$ ) 145.2, 138.2, 135.6, 128.6, 127.4, 84.1, 53.6, 25.0, 9.0, 4.6.

$^{11}\text{B NMR}$  (128 MHz,  $\text{CDCl}_3$ )  $\delta$  31.0.

**IR** (ATR, film)  $\nu_{\text{max}}$  2949, 1614, 1360, 1144, 1088, 1022, 858  $\text{cm}^{-1}$ .

**HRMS** (ESI) Calculated for 446.2029  $m/z$ , found 446.2029  $m/z$  [ $\text{C}_{21}\text{H}_{34}\text{BGeN}_3\text{O}_2+\text{H}$ ] $^+$ .

### (4-(Azidomethyl)phenyl)boronic acid (22)

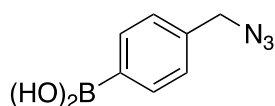

Prepared according to **General Procedure D** using (4-(bromomethyl)phenyl)boronic acid (645 mg, 3.00 mmol, 1.0 equiv) to afford the crude product. This was purified by precipitation from  $\text{Et}_2\text{O}$  with hexane to give the desired product as a white solid (457 mg, 2.58 mmol, 86%).

$^1\text{H NMR}$  (400 MHz,  $\text{DMSO}-d_6$ )  $\delta$  8.07 (s, 2H), 7.85 – 7.74 (m, 2H), 7.32 (d,  $J$  = 8.0 Hz, 2H), 4.44 (s, 2H).

$^{13}\text{C NMR}$  (101 MHz,  $\text{DMSO}-d_6$ )  $\delta$  137.2, 134.5, 127.4, 53.6.

$^{11}\text{B NMR}$  (128 MHz,  $\text{DMSO}-d_6$ )  $\delta$  28.5.

Spectral data consistent with the literature.<sup>17</sup>

### 2-(4-(Azidomethyl)phenyl)-6-methyl-1,3,6,2-dioxazaborocane-4,8-dione (23)

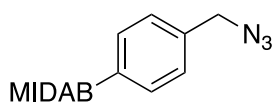

A flask was charged with (4-(hydroxymethyl)phenyl)boronic acid (760 mg, 5.00 mmol, 1.0 equiv.), 2,2'-(methylazanediyl)diacetic acid (736 mg, 5.00 mmol, 1.0 equiv.) and PhMe (25 mL). The flask was fitted with a Dean-Stark trap, filled with PhMe, and the flask was heated to 140  $^\circ\text{C}$  with stirring for 20 h. After this time, the mixture was cooled to RT and concentrated *in vacuo* to afford the crude product. This was purified by flash column chromatography (silica, 0–20% acetone in EtOAc) to give 4-(hydroxymethyl)-MIDA boronate as a white solid (132 mg, 10%).

This solid (132 mg, 500  $\mu\text{mol}$ , 1.0 equiv.) was subsequently dissolved in DMF (2.5 mL) under an atmosphere of  $\text{N}_2$  and cooled to 0  $^\circ\text{C}$ , before DPPA (130  $\mu\text{L}$ , 600  $\mu\text{mol}$ , 1.2 equiv.) and DBU (90  $\mu\text{L}$ , 600  $\mu\text{mol}$ , 1.2 equiv.) were added sequentially. The mixture was then warmed to RT, before being stirred for 15 h. After this time, the reaction was diluted by addition of EtOAc (20 mL), and the organic phase was washed with  $\text{H}_2\text{O}$  ( $3 \times 10$  mL). The organic extract was dried over  $\text{Na}_2\text{SO}_4$ , filtered, and concentrated *in vacuo* to afford the crude product. This was purified by flash column chromatography (silica, 0–20% acetone in EtOAc) to give the desired product as a white solid (111 mg, 385  $\mu\text{mol}$ , 77%).

<sup>1</sup>H NMR (400 MHz, MeCN-*d*<sub>3</sub>) δ 7.57 – 7.49 (m, 2H), 7.44 – 7.31 (m, 2H), 4.41 (s, 2H), 4.07 (d, *J* = 17.1 Hz, 2H), 3.90 (d, *J* = 17.1 Hz, 2H), 2.49 (s, 3H).

<sup>13</sup>C NMR (101 MHz, MeCN-*d*<sub>3</sub>) δ 169.5, 137.9, 134.0, 128.9, 62.8, 55.1, 48.5.

<sup>11</sup>B NMR (128 MHz, MeCN-*d*<sub>3</sub>) δ 11.3.

Spectral data consistent with the literature.<sup>18</sup>

### Ethynyl dimethyl(phenylethynyl)germane (24)

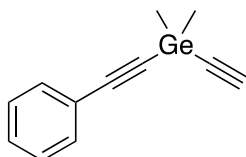

A flame-dried flask was evacuated, backfilled with N<sub>2</sub> (3 ×), then charged with phenylacetylene (110 μL, 1.00 mmol, 1.0 equiv) and Et<sub>2</sub>O (5.0 mL). The flask was cooled to –78 °C, *n*-butyllithium in hexane (500 μL, 2.20 M, 1.10 mmol, 1.1 equiv) was added dropwise, and the resulting mixture was stirred at –78 °C for one hour. A separate flame-dried flask was evacuated, backfilled with N<sub>2</sub> (3 ×), then charged with dichlorodimethylgermane (116 μL, 1.00 mmol, 1.0 equiv), Et<sub>2</sub>O (5.0 mL) and cooled to 0 °C. The prepared lithium acetylide solution was added dropwise to the dichlorogermane, and the resulting mixture was stirred at 0 °C for 20 min before ethynylmagnesium bromide in THF (3.00 mL, 0.5 M, 1.50 mmol, 1.5 equiv) was added dropwise at the same temperature. This mixture was stirred for two hours whilst being warmed to rt. The mixture was diluted with Et<sub>2</sub>O (10 mL) and quenched by the addition of H<sub>2</sub>O (10 mL) and the organic phase was collected. The aqueous phase was extracted with Et<sub>2</sub>O (3 × 20 mL), and the combined organic extracts were dried over Na<sub>2</sub>SO<sub>4</sub>, filtered, and concentrated in vacuo to afford the crude product. This was purified by flash column chromatography (silica, hexane) to give the desired product as a colourless oil (79.2 mg, 346 μmol, 35%).

<sup>1</sup>H NMR (500 MHz, CDCl<sub>3</sub>) δ 7.48 (d, *J* = 7.9 Hz, 2H), 7.30 (d, *J* = 7.5 Hz, 3H), 2.40 (s, 1H), 0.66 (s, 6H).

<sup>13</sup>C NMR (126 MHz, CDCl<sub>3</sub>) δ 132.2, 128.8, 128.3, 122.9, 105.0, 92.7, 89.7, 86.5, 0.8.

IR (ATR, film) ν<sub>max</sub> 3273, 2160, 2305, 1489, 1443, 1215, 845, 814, 758 cm<sup>-1</sup>.

HRMS inconclusive due to excess fragmentation.

### *tert*-Butyl 4-azido-3,6-dihydropyridine-1(2*H*)-carboxylate (25)

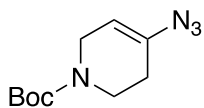

An oven-dried microwave vial was charged with *tert*-butyl 4-(4,4,5,5-tetramethyl-1,3,2-dioxaborolan-2-yl)-3,6-dihydropyridine-1(2*H*)-carboxylate (454 mg, 2.00 mmol, 1.0 equiv.), MeOH (6.0 mL), and anhydrous CuSO<sub>4</sub> (49.9 mg, 200 μmol, 1.0 equiv.). NaN<sub>3</sub> (156 mg, 2.40 mmol, 1.2 equiv.) was added and the mixture was stirred at RT open to air for 16 h. The mixture was concentrated *in vacuo* to afford the crude product. This was purified by flash column chromatography (silica, 0–10% Et<sub>2</sub>O in hexane) to give the desired product as a red oil (371 mg, 83%).

<sup>1</sup>H NMR (500 MHz, CDCl<sub>3</sub>) δ 5.39 – 5.18 (m, 1H), 3.99 – 3.95 (m, 2H), 3.58 (t, *J* = 5.7 Hz, 2H), 2.20 – 2.15 (m, 2H), 1.47 (s, 9H).

<sup>13</sup>C NMR (176 MHz, CDCl<sub>3</sub>) δ 154.7, 134.4, 110.4 – 106.9 (m), 80.1, 43.8 – 41.5 (m), 39.5, 28.5, 26.3.

IR (ATR, film) ν<sub>max</sub> 2976, 2106, 1691, 1413, 1364, 1236, 1157, 1113, 1092, 768 cm<sup>-1</sup>.

HRMS (ESI) Calculated for 225.1346 *m/z*, found 225.1346 *m/z* [C<sub>10</sub>H<sub>16</sub>N<sub>4</sub>O<sub>2</sub>+H]<sup>+</sup>.

**5-(Dimethylamino)-*N*-(3-(4-(triethylgermyl)-1*H*-1,2,3-triazol-1-yl)propyl)naphthalene-1-sulfonamide (26)**

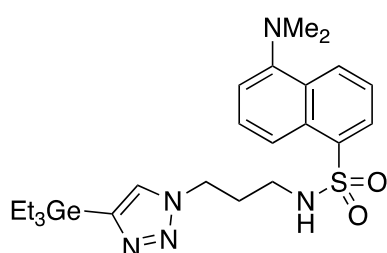

Prepared according to **General Procedure E** using triethyl(ethynyl)germane (9.0  $\mu\text{L}$ , 50  $\mu\text{mol}$ , 1.0 equiv) and 5-(dimethylamino)-*N*-(3-(4-(triethylgermyl)-1*H*-1,2,3-triazol-1-yl)propyl)naphthalene-1-sulfonamide (18.0 mg, 55.0  $\mu\text{mol}$ , 1.1 equiv) to afford the crude product. This was purified by flash column chromatography (silica, 10–100% EtOAc in hexane, followed by acetone flush) to give the desired product as a colourless oil (19.0 mg, 36.6  $\mu\text{mol}$ , 73%).

$^1\text{H NMR}$  (500 MHz,  $\text{CDCl}_3$ )  $\delta$  8.54 (dt,  $J = 8.6$ , 1.1 Hz, 1H), 8.26 (dt,  $J = 8.6$ , 1.0 Hz, 1H), 8.20 (dd,  $J = 7.2$ , 1.3 Hz, 1H), 7.58 (dd,  $J = 8.6$ , 7.6 Hz, 1H), 7.50 (dd,  $J = 8.6$ , 7.3 Hz, 1H), 7.43 (s, 1H), 7.19 (dd,  $J = 7.6$ , 1.0 Hz, 1H), 5.05 (t,  $J = 6.5$  Hz, 1H), 4.41 (t,  $J = 6.5$  Hz, 2H), 2.88 (s, 6H), 2.86 (q,  $J = 6.3$  Hz, 2H), 2.03 (p,  $J = 6.4$  Hz, 2H), 1.10 – 1.05 (m, 9H), 1.04 – 0.99 (m, 6H).

$^{13}\text{C NMR}$  (126 MHz,  $\text{CDCl}_3$ )  $\delta$  152.3, 144.7, 134.6, 130.8, 130.1, 129.8, 129.6, 129.2, 128.8, 123.3, 118.6, 115.5, 46.4, 45.5, 40.2, 30.7, 9.1, 4.7.

**HRMS (ESI)** Calculated for 520.1796  $m/z$ , found 520.1793  $m/z$  [ $\text{C}_{23}\text{H}_{35}\text{GeN}_5\text{O}_2 + \text{H}$ ] $^+$ .

**(3*S*,9*S*,10*R*,13*R*,14*S*,17*R*)-10,13-Dimethyl-17-((*R*)-6-methylheptan-2-yl)-2,3,4,7,8,9,10,11,12,13,14,15,16,17-tetradecahydro-1*H*-cyclopenta[*a*]phenanthren-3-yl (2-(2-(2-(2-(4-(triethylgermyl)-1*H*-1,2,3-triazol-1-yl)ethoxy)ethoxy)ethoxy)ethyl)carbamate (27)**

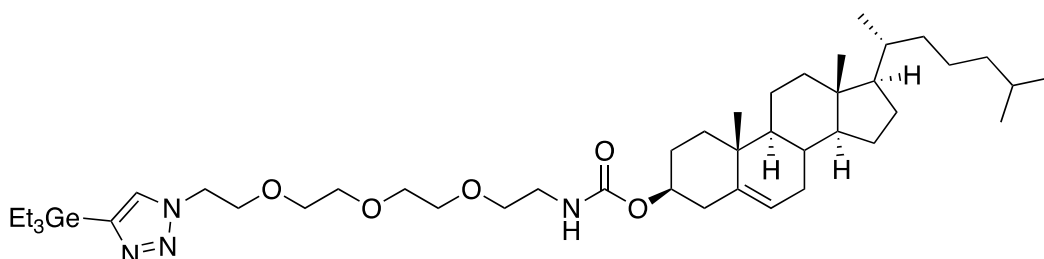

Prepared according to **General Procedure E** using triethyl(ethynyl)germane (9.0  $\mu\text{L}$ , 50  $\mu\text{mol}$ , 1.0 equiv) and (3*S*,9*S*,10*R*,13*R*,14*S*,17*R*)-10,13-dimethyl-17-((*R*)-6-methylheptan-2-yl)-2,3,4,7,8,9,10,11,12,13,14,15,16,17-tetradecahydro-1*H*-cyclopenta[*a*]phenanthren-3-yl (2-(2-(2-(2-azidoethoxy)ethoxy)ethoxy)ethyl)carbamate (34.7 mg, 55.0  $\mu\text{mol}$ , 1.1 equiv) to afford the crude product. This was purified by flash column chromatography (silica, 10–100% EtOAc in hexane, followed by acetone flush) to give the desired product as a colourless oil (23.0 mg, 28.2  $\mu\text{mol}$ , 56%).

$^1\text{H NMR}$  (500 MHz,  $\text{CDCl}_3$ )  $\delta$  7.62 (s, 1H), 5.36 (dt,  $J = 5.0$ , 2.1 Hz, 1H), 5.13 (d,  $J = 5.9$  Hz, 1H), 4.61 – 4.54 (m, 2H), 4.54 – 4.41 (m, 1H), 3.89 (t,  $J = 4.7$  Hz, 2H), 3.59 (d,  $J = 4.4$  Hz, 8H), 3.53 (t,  $J = 5.1$  Hz, 2H), 3.35 (q,  $J = 5.3$  Hz, 2H), 2.41 – 2.32 (m, 1H), 2.25 (t,  $J = 12.7$  Hz, 1H), 2.05 – 1.74 (m, 6H), 1.63 – 0.89 (m, 39H), 0.86 (dd,  $J = 6.6$ , 2.3 Hz, 6H), 0.67 (s, 3H).

$^{13}\text{C NMR}$  (126 MHz,  $\text{CDCl}_3$ )  $\delta$  156.3, 144.3, 140.0, 129.9, 122.6, 74.5, 70.7, 70.7, 70.7, 70.4, 70.3, 69.9, 56.8, 56.3, 50.2, 49.9, 42.5, 40.8, 39.9, 39.7, 38.7, 37.1, 36.7, 36.3, 35.9, 32.0, 32.0, 29.8, 28.4, 28.3, 28.1, 24.4, 24.0, 23.0, 22.7, 21.2, 19.5, 18.9, 12.0, 9.1, 4.7.

**HRMS (ESI)** Calculated for 817.5257  $m/z$ , found 817.5277  $m/z$  [ $\text{C}_{44}\text{H}_{78}\text{GeN}_4\text{O}_5 + \text{H}$ ] $^+$ .



## 2-(4-((4-(Triethylgermyl)-1H-1,2,3-triazol-1-yl)methyl)phenyl)thiazole (28)

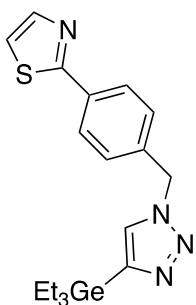

An oven-dried microwave vial was sealed, evacuated, and backfilled with  $N_2$  ( $3 \times$ ), before being charged with 2-bromothiazole (9.0  $\mu$ L, 100  $\mu$ mol, 1.0 equiv) and a 4:1 mixture of degassed toluene/EtOH (0.66 mL, 0.15 M). To this solution aq. 2 M  $Na_2CO_3$  (0.40 mL), KCl (22.4 mg, 300  $\mu$ mol, 3.0 equiv), and 1-(4-(4,4,5,5-tetramethyl-1,3,2-dioxaborolan-2-yl)benzyl)-4-(triethylgermyl)-1H-1,2,3-triazole (53.3 mg, 120  $\mu$ mol, 1.2 equiv) were added sequentially. After refilling the headspace with  $N_2$ ,  $Pd(PPh_3)_4$  (12.0 mg, 10.0  $\mu$ mol, 10 mol %) was added, and the reaction mixture was stirred at 100  $^\circ$ C overnight. The reaction mixture was then cooled to rt and the mixture was filtered through celite (eluting with  $CH_2Cl_2$  (10 mL)). The filtrate was dried over  $Na_2SO_4$ , filtered, and concentrated in vacuo to afford the crude product. This was purified by flash column chromatography (silica, 10–100% acetone in hexane) and the residue obtained was taken up in EtOH (300  $\mu$ L, 0.33 M), combined with  $ZnCl_2$  (27.3 mg, 200  $\mu$ mol, 2.0 equiv) and left to stir at rt for three hours. The resulting mixture was filtered, with the filtrate concentrated *in vacuo* leaving a crude yellow oil. This was then washed through silica with  $Et_2O$  to give the desired product as a yellow solid (14.0 mg, 34.9  $\mu$ mol, 35%).

$^1H$  NMR (500 MHz,  $CDCl_3$ )  $\delta$  8.00 – 7.94 (m, 2H), 7.87 (d,  $J$  = 3.3 Hz, 1H), 7.41 (s, 1H), 7.35 (d,  $J$  = 3.3 Hz, 1H), 7.34 – 7.30 (m, 2H), 5.61 (s, 2H), 1.09 – 0.99 (m, 15H).

$^{13}C$  NMR (126 MHz,  $CDCl_3$ )  $\delta$  145.4, 144.0, 137.1, 134.0, 128.6, 128.5, 127.3, 125.7, 119.4, 53.3, 9.1, 4.7.

IR (ATR, film)  $\nu_{max}$  2951, 2928, 2870, 2311, 1653, 1558, 1541, 1506, 1456, 1093, 1043, 769  $cm^{-1}$ .

HRMS (ESI) Calculated for 403.1006  $m/z$ , found 403.1000  $m/z$  [ $C_{18}H_{24}GeN_4S+H$ ] $^+$ .

## 1-Benzyl-4-phenyl-1H-1,2,3-triazole (29)

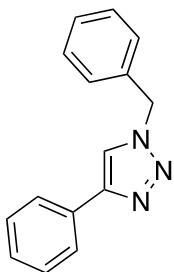

An oven-dried microwave vial was charged with 1-benzyl-4-(triethylgermyl)-1H-1,2,3-triazole (31.8 mg, 100  $\mu$ mol, 1.0 equiv),  $Pd_2(dba)_3$  (2.3 mg, 2.50  $\mu$ mol, 2.5 mol %), and  $AgBF_4$  (29.2 mg, 150  $\mu$ mol, 1.5 equiv). The vial was sealed, evacuated, and backfilled with  $N_2$  ( $3 \times$ ). DMF (300  $\mu$ L) and PhI (17.0  $\mu$ L, 150  $\mu$ mol, 1.5 equiv) were added and the mixture was heated to 80  $^\circ$ C and stirred for 16 h. After allowing to cool to rt, the vial was unsealed and sat. aq.  $NH_4Cl$  (2.0 mL) was added, and the mixture was filtered through cotton wool (eluting with  $Et_2O$  (10 mL)). The organic phase was collected, and the aqueous phase was extracted with  $Et_2O$  ( $3 \times$  20 mL) and the combined organic extracts were dried over  $Na_2SO_4$ , filtered and concentrated in vacuo to afford the crude product. This was purified by flash column chromatography (silica, 0–15% EtOAc in hexane) to give the desired product as a white solid (21.4 mg, 91.0  $\mu$ mol, 91%).

$^1H$  NMR (500 MHz,  $CDCl_3$ )  $\delta$  7.86 – 7.78 (m, 2H), 7.66 (s, 1H), 7.43 – 7.36 (m, 5H), 7.31 (ddt,  $J$  = 7.3, 5.1, 1.2 Hz, 3H), 5.57 (s, 2H).

$^{13}C$  NMR (126 MHz,  $CDCl_3$ )  $\delta$  148.4, 134.8, 130.7, 129.3, 128.9, 128.9, 128.3, 128.2, 125.8, 119.6, 54.4.

Spectral data consistent with the literature.<sup>19</sup>

### 1-Benzyl-4-bromo-1*H*-1,2,3-triazole (30)

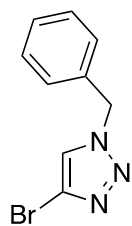

A flask was charged with 1-benzyl-4-(triethylgermyl)-1*H*-1,2,3-triazole (71.3 mg, 224  $\mu\text{mol}$ , 1.0 equiv) and DMF (750  $\mu\text{L}$ ). NBS (289 mg, 448  $\mu\text{mol}$ , 2.0 equiv) was added and the mixture was stirred at rt for two hours. Sat. aq.  $\text{Na}_2\text{S}_2\text{O}_3$  solution (10 mL) was added followed by  $\text{CH}_2\text{Cl}_2$  (10 mL). The organic phase was collected, and the aqueous phase was further extracted with  $\text{CH}_2\text{Cl}_2$  ( $3 \times 10$  mL). The combined organic extracts were dried over  $\text{Na}_2\text{SO}_4$ , filtered, and concentrated in vacuo to afford the crude product. This was purified by flash column chromatography (silica, 0–20% EtOAc in hexane) to give the desired product as a white solid (53.4 mg, 224  $\mu\text{mol}$ , >99%).

$^1\text{H}$  NMR (500 MHz,  $\text{CDCl}_3$ )  $\delta$  7.46 (s, 1H), 7.38 (m, 3H), 7.30 – 7.25 (m, 2H), 5.52 (s, 2H).

$^{13}\text{C}$  NMR (126 MHz,  $\text{CDCl}_3$ )  $\delta$  133.8, 129.3, 129.1, 128.2, 123.7, 120.9, 54.9.

Spectral data consistent with the literature.<sup>20</sup>

### 4-Bromo-1-(4-(4,4,5,5-tetramethyl-1,3,2-dioxaborolan-2-yl)benzyl)-1*H*-1,2,3-triazole (31)

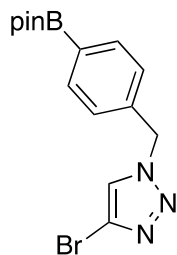

A flask was charged with 1-(4-(4,4,5,5-tetramethyl-1,3,2-dioxaborolan-2-yl)benzyl)-4-(triethylgermyl)-1*H*-1,2,3-triazole (39.6 mg, 89.2  $\mu\text{mol}$ , 1.0 equiv) and DMF (300  $\mu\text{L}$ ). NBS (31.8 mg, 178  $\mu\text{mol}$ , 2.0 equiv) was added and the mixture was stirred at rt for two hours. Sat. aq.  $\text{Na}_2\text{S}_2\text{O}_3$  solution (10 mL) was added followed by  $\text{CH}_2\text{Cl}_2$  (10 mL). The organic phase was collected, and the aqueous phase was further extracted with  $\text{CH}_2\text{Cl}_2$  ( $2 \times 10$  mL). The combined organic extracts were dried over  $\text{Na}_2\text{SO}_4$ , filtered, and concentrated in vacuo to afford the crude product. This was purified by flash column chromatography (silica, 0–20% EtOAc in hexane) to give the desired product as a white solid (7.5 mg, 21  $\mu\text{mol}$ , 23%).

$^1\text{H}$  NMR (400 MHz,  $\text{CDCl}_3$ )  $\delta$  7.86 – 7.78 (m, 2H), 7.41 (s, 1H), 7.30 – 7.24 (m, 2H), 5.53 (s, 2H), 1.34 (s, 12H).

$^{13}\text{C}$  NMR (101 MHz,  $\text{CDCl}_3$ )  $\delta$  136.5, 135.7, 127.5, 123.6, 120.9, 84.1, 54.9, 24.9.

$^{11}\text{B}$  NMR (128 MHz,  $\text{CDCl}_3$ )  $\delta$  30.8.

IR (ATR, film)  $\nu_{\text{max}}$  2976, 1614, 1398, 1358, 1325, 1263, 1142, 1088, 1042, 1020, 980, 858  $\text{cm}^{-1}$ .

HRMS (ESI) Calculated for 364.0827  $m/z$ , found 364.0836  $m/z$  [ $\text{C}_{15}\text{H}_{19}\text{BBrN}_3\text{O}_2+\text{H}$ ]<sup>+</sup>.

### 1-(3-(1-Benzyl-1*H*-1,2,3-triazol-4-yl)thiophen-2-yl)ethan-1-one (32)

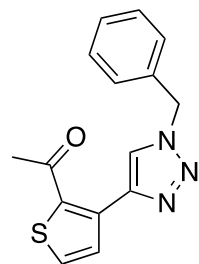

An oven-dried microwave vial was charged with 1-benzyl-4-bromo-1*H*-1,2,3-triazole (18.0 mg, 75.6  $\mu\text{mol}$ , 1.0 equiv),  $\text{Pd}(\text{dtbpf})\text{Cl}_2$  (4.9 mg, 7.56  $\mu\text{mol}$ , 10 mol %),  $\text{K}_3\text{PO}_4$  (32.1 mg, 151  $\mu\text{mol}$ , 2.0 equiv), and (2-acetylthiophen-3-yl)boronic acid (15.4 mg, 90.7  $\mu\text{mol}$ , 1.2 equiv). The vial was sealed, evacuated, and backfilled with  $\text{N}_2$  ( $3 \times$ ), before  $i\text{PrOH}$  (120  $\mu\text{L}$ ) and  $\text{H}_2\text{O}$  (150  $\mu\text{L}$ ) were added sequentially. The solution was heated to 85  $^\circ\text{C}$  and stirred for 16 h. After allowing to cool to rt, the mixture was filtered through celite (eluting with MeOH (10 mL)) and concentrated in vacuo.  $\text{H}_2\text{O}$  (10 mL) and EtOAc (10 mL) were added, the organic phase was collected then the aqueous phase was further extracted with EtOAc ( $2 \times 10$  mL). The combined organic extracts were dried over  $\text{Na}_2\text{SO}_4$ , filtered, and concentrated in vacuo to afford the crude product. This was purified by flash column chromatography (silica, 0–15% EtOAc in hexane) to give the desired product as a red solid (19.1 mg, 67.4  $\mu\text{mol}$ , 89%).

**<sup>1</sup>H NMR (500 MHz, CDCl<sub>3</sub>)** δ 8.73 (s, 1H), 8.05 (d, *J* = 5.2 Hz, 1H), 7.54 (d, *J* = 5.2 Hz, 1H), 7.40 – 7.30 (m, 5H), 5.58 (s, 2H), 2.57 (s, 3H).

**<sup>13</sup>C NMR (126 MHz, CDCl<sub>3</sub>)** δ 190.9, 142.8, 136.0, 135.0, 134.9, 131.3, 130.1, 129.2, 128.8, 128.1, 125.6, 54.3, 30.2.

**IR (ATR, film)**  $\nu_{\max}$  1662, 1506, 1454, 1408, 1356, 1283, 1213, 1047, 964, 874, 758 cm<sup>-1</sup>.

**HRMS (ESI)** Calculated for 284.0852 *m/z*, found 284.0858 *m/z* [C<sub>15</sub>H<sub>13</sub>N<sub>3</sub>OS+H]<sup>+</sup>.

#### 4-(Naphthalen-1-yl)-1-(4-(4,4,5,5-tetramethyl-1,3,2-dioxaborolan-2-yl)benzyl)-1*H*-1,2,3-triazole (33)

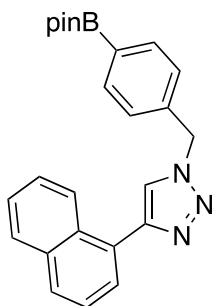

An oven-dried microwave vial was charged with magnesium turnings (3.5 mg, 130 μmol, 1.3 equiv) and a crystal of iodine then sealed, evacuated, and backfilled with N<sub>2</sub> (3 ×). THF (500 μL) was added followed by 1-iodonaphthalene (17.5 μL, 120 μmol, 1.2 equiv). The vial was heated gently with a heat gun to initiate Grignard formation and the resulting mixture was stirred for one hour at rt. The vial was decapped under a blanket of N<sub>2</sub> and ZnBr<sub>2</sub> (27.0 mg, 120 μmol, 1.2 equiv) was added, with the vial then resealed and the solution stirred for 0.5 h. A separate oven-dried microwave vial was charged with Pd(dtbpf)Cl<sub>2</sub> (0.7 mg, 1.0 μmol, 1.0 equiv) and 4-bromo-1-(4-(4,4,5,5-tetramethyl-1,3,2-dioxaborolan-2-yl)benzyl)-1*H*-1,2,3-triazole (36.4 mg, 100 μmol, 1.0 equiv). The vial was sealed, evacuated, and backfilled with N<sub>2</sub>. To this, the 1-naphthylzinc bromide solution was added dropwise and, once addition was completed, the mixture was heated to 45 °C and stirred for 16 h. After this time, the reaction mixture was cooled to rt, and aq. 2 M HCl (5 mL) was added followed by sat. aq. NaHCO<sub>3</sub> until a pH of >7 was reached. CH<sub>2</sub>Cl<sub>2</sub> (10 mL) was added, and the mixture was transferred to a separating funnel. The organic phase was collected, and the aqueous phase was further extracted with CH<sub>2</sub>Cl<sub>2</sub> (3 × 10 mL). The combined organic extracts were dried over Na<sub>2</sub>SO<sub>4</sub>, filtered, and concentrated in vacuo to afford the crude product. This was purified by flash column chromatography (silica, 0–15% EtOAc in hexane) to give the desired product as a white solid (19.8 mg, 48.1 μmol, 48%).

**<sup>1</sup>H NMR (400 MHz, CDCl<sub>3</sub>)** δ 8.39 – 8.29 (m, 1H), 7.92 – 7.82 (m, 4H), 7.70 (s, 1H), 7.68 (dd, *J* = 7.1, 1.3 Hz, 1H), 7.53 – 7.46 (m, 3H), 7.41 – 7.35 (m, 2H), 5.67 (s, 2H), 1.34 (s, 12H).

**<sup>13</sup>C NMR (101 MHz, CDCl<sub>3</sub>)** δ 147.6, 137.6, 135.8, 134.0, 131.2, 129.1, 128.6, 128.1, 127.6, 127.4, 126.8, 126.1, 125.6, 125.4, 122.6, 84.2, 54.5, 25.0.

**<sup>11</sup>B NMR (128 MHz, CDCl<sub>3</sub>)** δ 30.7.

**IR (ATR, film)**  $\nu_{\max}$  2976, 1614, 1406, 1398, 1360, 1325, 1267, 1213, 1167, 1142, 1088, 1049, 1020, 962, 756, 818, 777 cm<sup>-1</sup>.

**HRMS (ESI)** Calculated for 412.2191 *m/z*, found 412.2195 *m/z* [C<sub>25</sub>H<sub>26</sub>BN<sub>3</sub>O<sub>2</sub>+H]<sup>+</sup>.

#### 4-((4-(Triethylgermyl)-1*H*-1,2,3-triazol-1-yl)methyl)phenol (34)

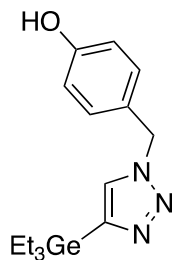

An HPLC vial was charged with 1-(4-(4,4,5,5-tetramethyl-1,3,2-dioxaborolan-2-yl)benzyl)-4-(triethylgermyl)-1*H*-1,2,3-triazole (44.4 mg, 100  $\mu\text{mol}$ , 1.0 equiv),  $\text{B}(\text{OH})_3$  (12.4 mg, 200  $\mu\text{mol}$ , 2.0 equiv),  $\text{Cu}(\text{OAc})_2 \cdot \text{H}_2\text{O}$  (6.0 mg, 30.0  $\mu\text{mol}$ , 30 mol %), and 4 Å MS (50 mg). The vial was capped, a bleed needle was equipped then MeCN (150  $\mu\text{L}$ ) and DBU (30.0  $\mu\text{L}$ , 200  $\mu\text{mol}$ , 2.0 equiv) were added, then the mixture was heated at 70 °C for 24 h. After allowing to cool to rt, the mixture was transferred to a separating funnel and diluted with  $\text{CH}_2\text{Cl}_2$  (10 mL) and 10% aq.  $\text{NH}_3$  solution (10 mL). The organic phase was collected, and the aqueous phase was further extracted with  $\text{CH}_2\text{Cl}_2$  ( $2 \times 10$  mL). The combined organic extracts were dried over  $\text{Na}_2\text{SO}_4$ , filtered, and concentrated in vacuo to afford the crude product. This was purified by flash column chromatography (silica, 0–50% EtOAc in hexane) to give the desired product as a brown solid (30.2 mg, 90.4  $\mu\text{mol}$ , 90%).

$^1\text{H}$  NMR (500 MHz,  $\text{CDCl}_3$ )  $\delta$  7.37 (s, 1H), 7.35 – 7.32 (m, 2H), 7.20 – 7.16 (m, 2H), 5.53 (s, 2H), 1.10 – 1.01 (m, 15H).

NB: OH proton not observed.

$^{13}\text{C}$  NMR (126 MHz,  $\text{CDCl}_3$ )  $\delta$  145.4, 134.7, 133.8, 129.4, 129.4, 128.4, 52.9, 9.0, 4.7.

IR (ATR, film)  $\nu_{\text{max}}$  2953, 2872, 1492, 1090, 1045, 1017, 097, 806, 758  $\text{cm}^{-1}$ .

HRMS (ESI) Calculated for 320.1178  $m/z$ , found 320.1172  $m/z$  [ $\text{C}_{15}\text{H}_{23}\text{GeN}_3\text{O}-\text{OH}+2\text{H}$ ] $^+$ .

#### 1-(4-((4-(Triethylgermyl)-1*H*-1,2,3-triazol-1-yl)methyl)phenyl)piperidine (35)

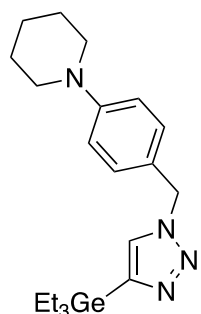

An HPLC vial was charged with 1-(4-(4,4,5,5-tetramethyl-1,3,2-dioxaborolan-2-yl)benzyl)-4-(triethylgermyl)-1*H*-1,2,3-triazole (44.4 mg, 100  $\mu\text{mol}$ , 1.0 equiv),  $\text{B}(\text{OH})_3$  (12.4 mg, 200  $\mu\text{mol}$ , 2.0 equiv),  $\text{Cu}(\text{OAc})_2 \cdot \text{H}_2\text{O}$  (6.0 mg, 30.0  $\mu\text{mol}$ , 30 mol %), and 4 Å MS (50 mg). The vial was capped, a bleed needle was equipped then MeCN (150  $\mu\text{L}$ ) and piperidine (20.0  $\mu\text{L}$ , 200  $\mu\text{mol}$ , 2.0 equiv) were added, then the mixture was heated at 70 °C for 24 h. After allowing to cool to rt, the mixture was transferred to a separating funnel and diluted with  $\text{CH}_2\text{Cl}_2$  (10 mL) and 10% aq.  $\text{NH}_3$  solution (10 mL). The organic phase was collected, and the aqueous phase was further extracted with  $\text{CH}_2\text{Cl}_2$  ( $2 \times 10$  mL). The combined organic extracts were dried over  $\text{Na}_2\text{SO}_4$ , filtered, and concentrated in vacuo to afford the crude product. This was purified by flash column chromatography (silica, 0–20% EtOAc in hexane) to give the desired product as an orange solid (21.7 mg, 54.1  $\mu\text{mol}$ , 54%).

$^1\text{H}$  NMR (500 MHz,  $\text{CDCl}_3$ )  $\delta$  7.32 (s, 1H), 7.16 (d,  $J = 8.6$  Hz, 2H), 6.91 (d,  $J = 8.7$  Hz, 2H), 5.45 (s, 2H), 3.23 – 3.14 (m, 4H), 1.70 (p,  $J = 5.8$  Hz, 4H), 1.59 (q,  $J = 6.2$  Hz, 2H), 1.09 – 0.97 (m, 15H).

$^{13}\text{C}$  NMR (126 MHz,  $\text{CDCl}_3$ )  $\delta$  152.1, 144.8, 129.4, 128.2, 125.9, 116.5, 53.3, 50.4, 25.8, 24.3, 9.1, 4.7.

IR (ATR, film)  $\nu_{\text{max}}$  2932, 1907, 1870, 1614, 1516, 1452, 1383, 1238, 1190, 1130, 1096, 1045, 1024, 810, 757  $\text{cm}^{-1}$ .

HRMS (ESI) Calculated for 403.1912  $m/z$ , found 403.1894  $m/z$  [ $\text{C}_{20}\text{H}_{32}\text{GeN}_4+\text{H}$ ] $^+$ .

## 5. X-ray diffraction data

X-ray diffraction data for compound **13** were collected at 100 K using a Rigaku FR-X Ultrahigh Brilliance Microfocus RA generator/confocal optics with XtaLAB P200 diffractometer [Mo K $\alpha$  radiation ( $\lambda = 0.71073$  Å)]. Data were collected (using a calculated strategy) and processed (including correction for Lorentz, polarization and absorption) using CrysAlisPro.<sup>21</sup> The structure was solved by dual-space methods (SHELXT<sup>22</sup>) and refined by full-matrix least-squares against  $F^2$  (SHELXL-2019/3<sup>23</sup>). Non-hydrogen atoms were refined anisotropically, and hydrogen atoms were refined using a riding model. All calculations were performed using the Olex2<sup>24</sup> interface. Selected crystallographic data are presented in **Table S2**. CCDC 2355570 contains the supplementary crystallographic data for this paper. These data can be obtained free of charge from The Cambridge Crystallographic Data Centre via [www.ccdc.cam.ac.uk/structures](http://www.ccdc.cam.ac.uk/structures).

**Table S2.** Selected crystallographic data.

|                                                     | <b>13</b>                                          |
|-----------------------------------------------------|----------------------------------------------------|
| formula                                             | C <sub>28</sub> H <sub>23</sub> N <sub>3</sub> OGe |
| fw                                                  | 490.08                                             |
| crystal description                                 | colourless plate                                   |
| crystal size [mm <sup>3</sup> ]                     | 0.09 x 0.09 x 0.01                                 |
| space group                                         | <i>P2<sub>1</sub>2<sub>1</sub>2<sub>1</sub></i>    |
| <i>a</i> [Å]                                        | 7.19194(13)                                        |
| <i>b</i> [Å]                                        | 15.2354(4)                                         |
| <i>c</i> [Å]                                        | 42.5349(9)                                         |
| vol [Å <sup>3</sup> ]                               | 4660.64(18)                                        |
| <i>Z</i>                                            | 8                                                  |
| $\rho$ (calc) [g/cm <sup>3</sup> ]                  | 1.397                                              |
| $\mu$ [mm <sup>-1</sup> ]                           | 1.340                                              |
| F(000)                                              | 2016.0                                             |
| reflections collected                               | 52500                                              |
| independent reflections ( <i>R</i> <sub>int</sub> ) | 10795 (0.0487)                                     |
| parameters, restraints                              | 596, 144                                           |
| GooF on $F^2$                                       | 1.090                                              |
| <i>R</i> <sub>1</sub> [ $I > 2\sigma(I)$ ]          | 0.0524                                             |
| <i>wR</i> <sub>2</sub> (all data)                   | 0.1014                                             |
| largest diff. peak/hole [e/Å <sup>3</sup> ]         | 1.40/-1.01                                         |
| flack parameter                                     | 0.49(3)                                            |

## 6. References

1. W. L. F. Armarego and C. Chai, *Purification of Laboratory Chemicals*, 6th Ed., Elsevier: Oxford, 2009.
2. M. Fishwick, M. G. H. Wallbridge, *J. Chem. Soc. A*, 1971, 57–63.
3. J. Wei, J. Chen, J. M. Miller, *Rapid Commun. Mass Spectrom.* 2001, **15**, 169–181.
4. N. H. El-Dershaby, S. A. El-Hawash, S. E. Kassab, H. G. Daabees, A. E. Abdel Moneim, M. M. M. El-Miligy, *Pharmaceuticals*, 2022, **15**, 1165.
5. T. H. Sum, T. J. Sum, W. R. J. D. Galloway, S. Collins, D. G. Twigg, F. Hollfelder, D. R. Spring, *Molecules*, 2016, **21**, 1230.
6. A. Aljabour, H. Awada, L. Song, H. Sun, S. Offenthaler, F. Yari, M. Bechmann, M. C. Scharber, W. Schöfberger, *Angew. Chem. Int. Ed.*, 2023, **62**, e202302208.
7. H. Wongoso, M. Ono, T. Yamasaki, K. Kumata, M. Higuchi, M.-R. Zhang, M. J. Fulham, A. Katsifis, P. A. Keller, *RSC Med. Chem.*, 2023, **14**, 858–868.
8. L.-J. Chen, C.-J. Kuo, C.-F. Liang, *J. Org. Chem.*, 2023, **88**, 10501–10507.
9. M. V. Vita, J. Waser, *Org. Lett.*, 2013, **15**, 3246–3249.
10. X. Li, J.-N. Song, S. Karmakar, Y. Lu, Y. Lv, P. Liao, Z. Liu, *Chem. Commun.*, 2022, **58**, 13783–13786.
11. P. T. G. Rabet, G. Fumagalli, S. Boyd, M. F. Greaney, *Org. Lett.*, 2016, **18**, 1646–1649.
12. C. Russo, M. C. Leech, J. M. Walsh, J. I. Higham, L. Giannessi, E. Lambert, C. Kiaku, D. L. Poole, J. Mason, C. A. I. Goodall, P. Devo, M. Giustiniano, M. Radi, K. Lam, *Angew. Chem. Int. Ed.*, 2023, **62**, e202309563.
13. L. Ren, N. Jiao, *Chem. Commun.*, 2014, **50**, 3706–3709.
14. L. Donnier-Valentin, S. Kassamba, J. Legros, C. Fressigné, D. Vuluga, R. C. D. Brown, B. Lunclau, M. De Paolis, *Org. Lett.*, 2023, **25**, 8580–8584.
15. M. Mato, M. Montesinos-Magraner, A. R. Sugranyes, A. M. Echavarren, *J. Am. Chem. Soc.*, 2021, **143**, 10760–10769.
16. K. Kojima, S. Uchida, H. Kinoshita, K. Miura, *Org. Lett.* 2021, **23**, 4598–4602.
17. J. Zhou, P. Stapleton, S. Haider, J. Healy, *Bioorg. Med. Chem.*, 2018, **26**, 2921–2927.
18. C. K. L. Gordon, D. Wu, A. Pusuluri, T. A. Feagin, A. T. Csordas, M. S. Eisenstein, C. J. Hawker, J. Niu, H. T. Soh, *ACS Chem. Biol.*, 2019, **14**, 2652–2662.
19. P. Du, J.-F. Li, Y.-Y. Liu, J.-F. Ma, G.-H. Xu, *Dalton Trans.*, 2020, **49**, 3715–3722.
20. D. B. Emerin, V. V. Fokin, *J. Am. Chem. Soc.*, 2021, **143**, 18374–18379.
21. *CrysAlisPro* v1.171.43.109a Rigaku Oxford Diffraction, Rigaku Corporation, Tokyo, Japan, 2023.
22. G. Sheldrick, *Acta Crystallogr., Sect. A: Found. Adv.* 2015, **71**, 3–8.
23. G. Sheldrick, *Acta Crystallogr. Sect. C: Struct. Chem.* 2015, **71**, 3–8.
24. O. V. Dolomanov, L. J. Bourhis, R. J. Gildea, J. A. K. Howard, H. Puschmann, *J. Appl. Crystallogr.* 2009, **42**, 339–341.

## 7. Spectra

S1 -  $^1\text{H}$

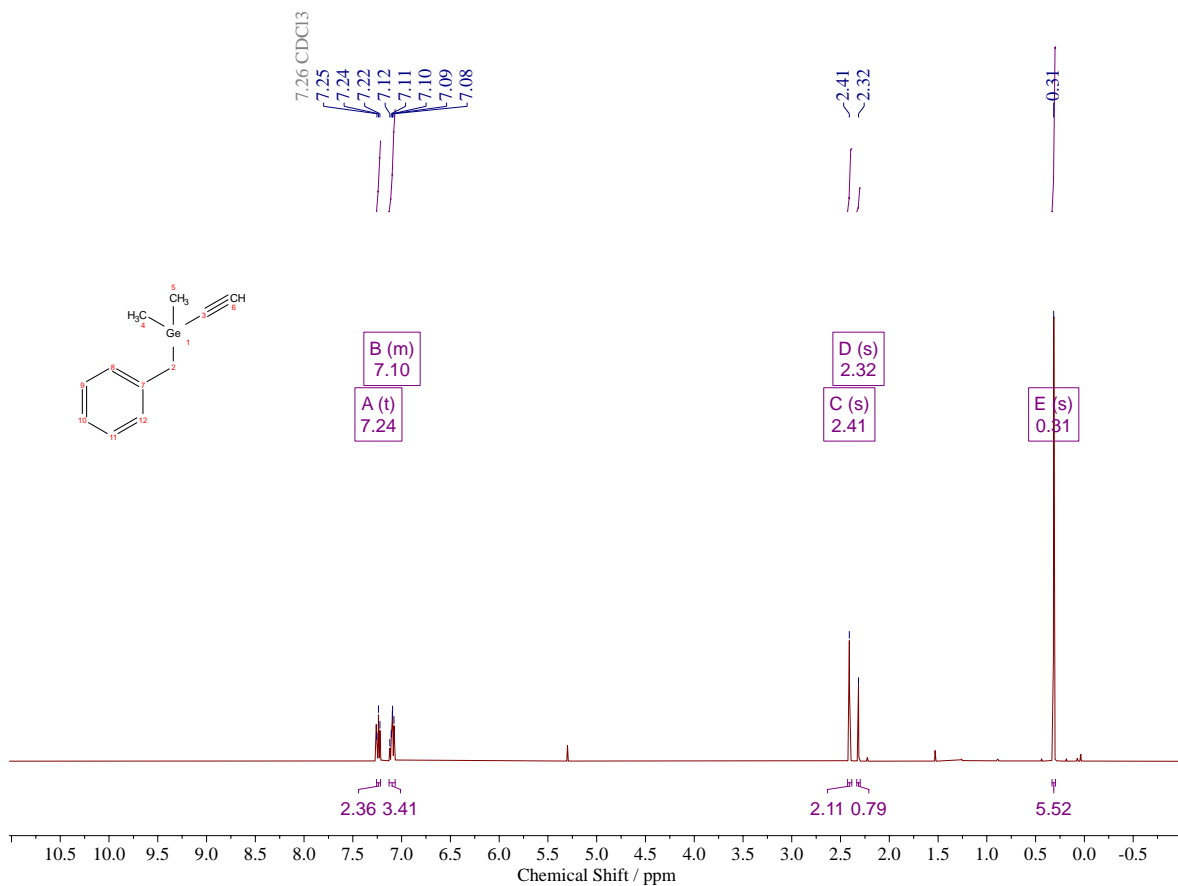

$^{13}\text{C}$  DEPTQ

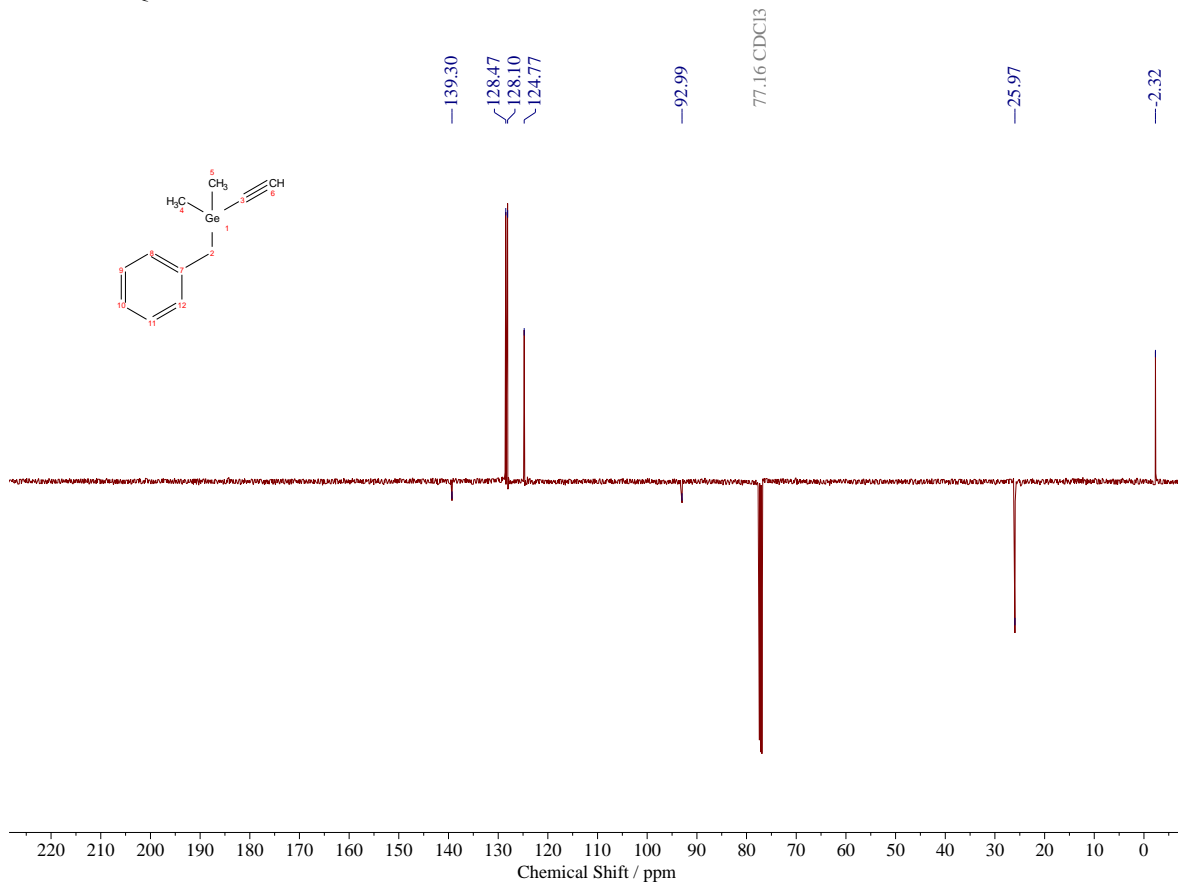

S2 - <sup>1</sup>H

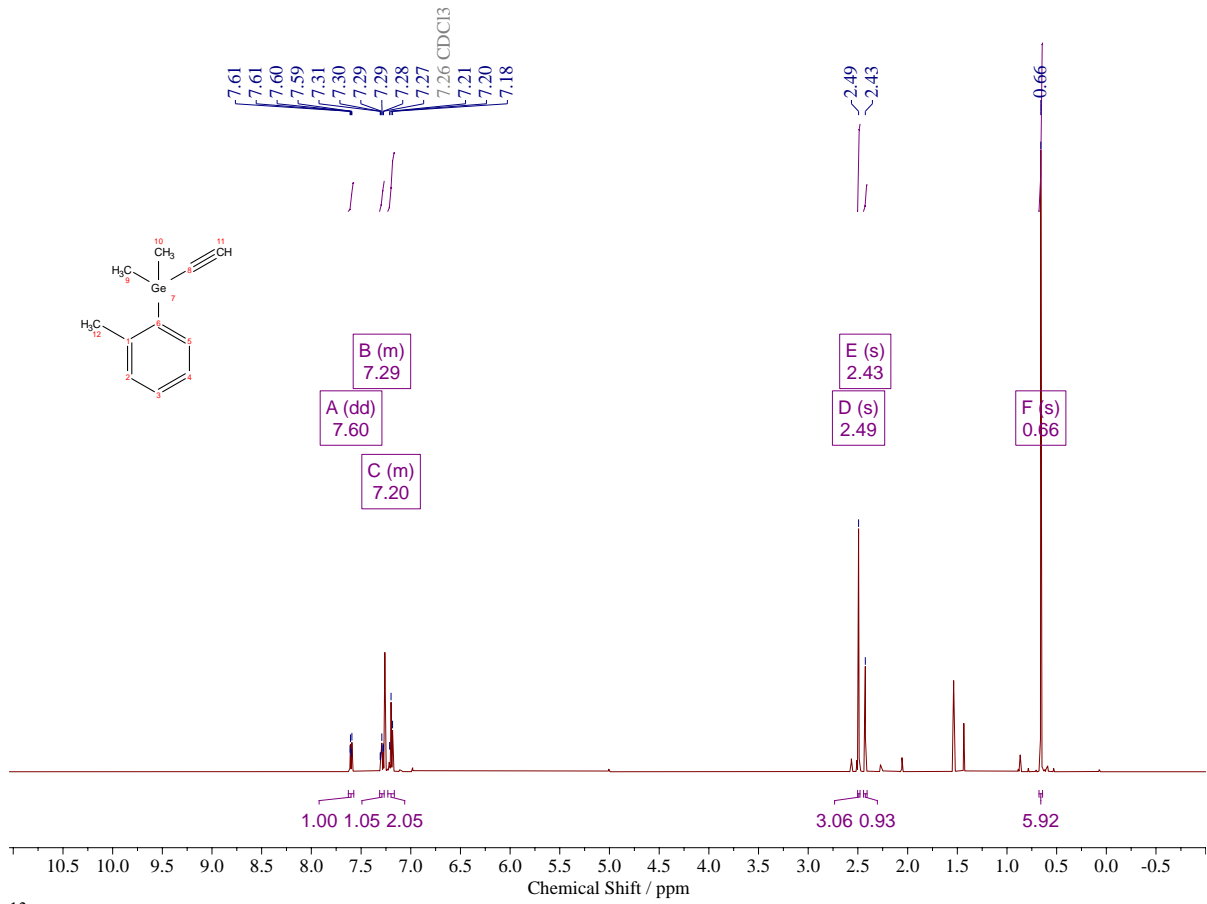

<sup>13</sup>C DEPTQ

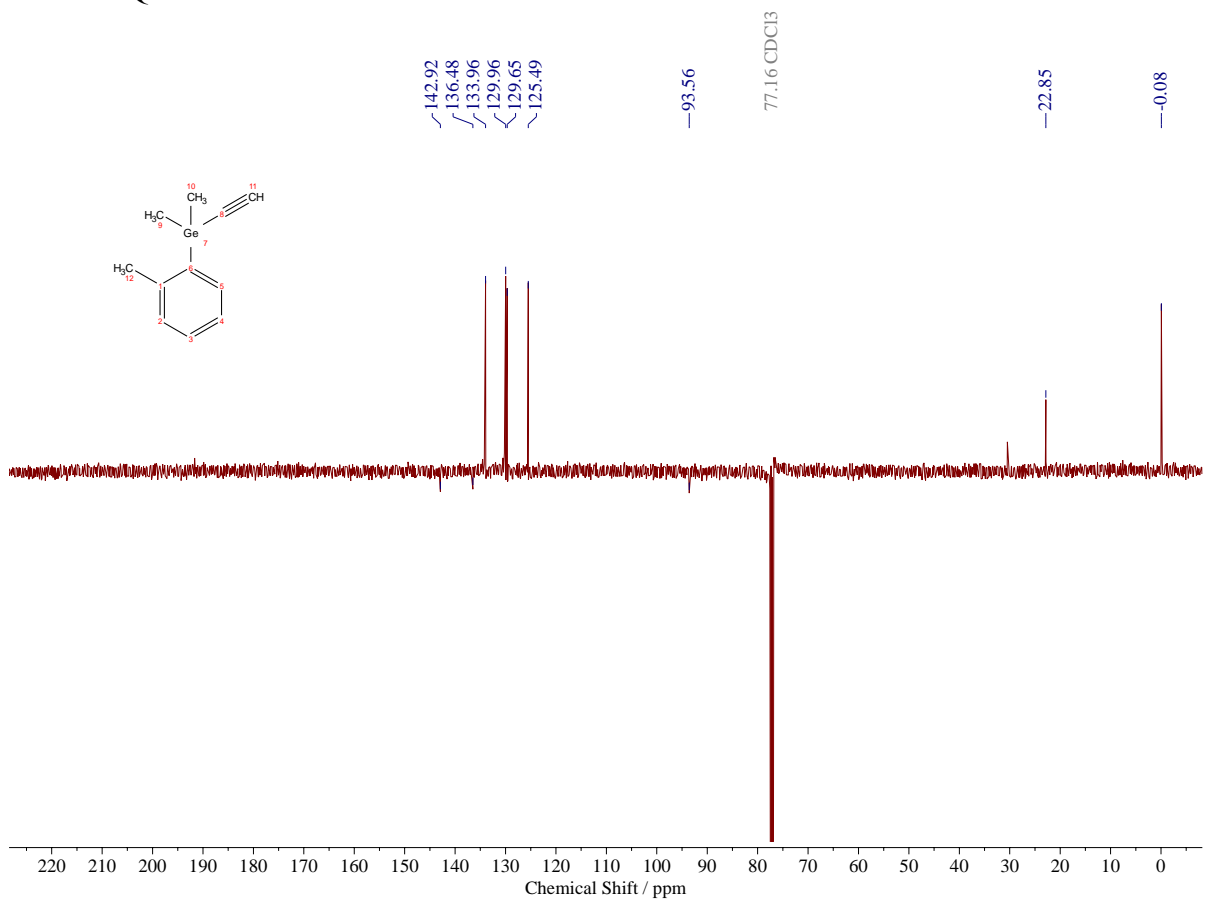



# S3 - <sup>1</sup>H

2204240928-0-25-amb57.10.fid  
AMB339\_Caract || 1H Observe

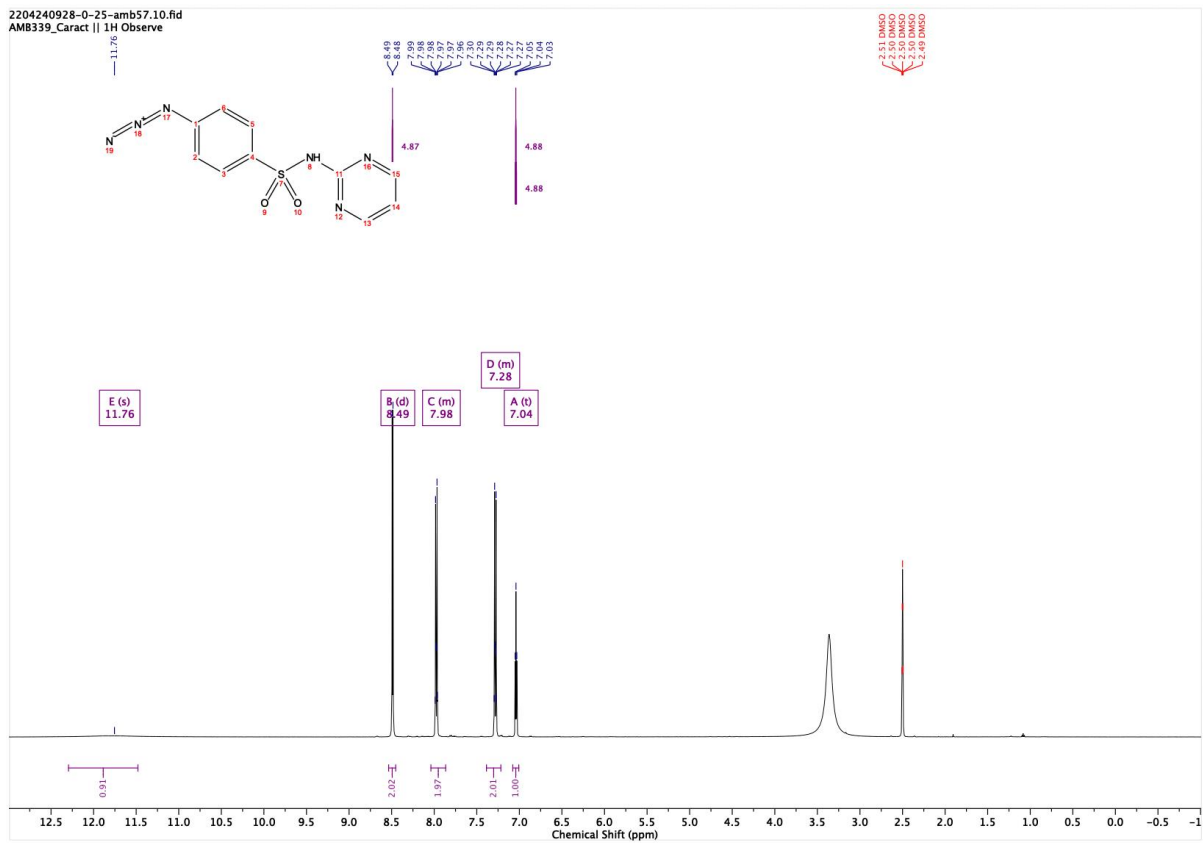

# <sup>13</sup>C

2204240928-0-25-amb57.11.fid  
AMB339\_Caract || 13C Observe with 1H decoupling - D1 = 2s

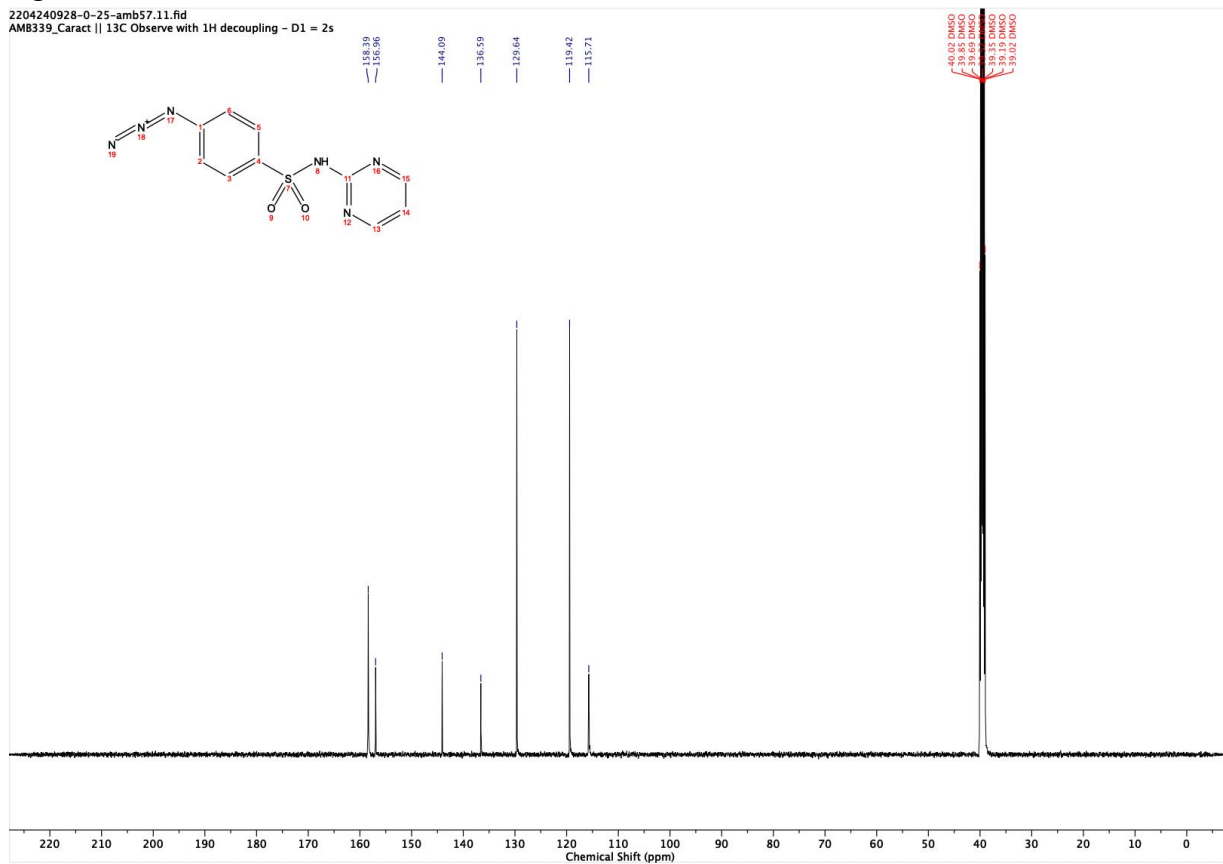

S4 - <sup>1</sup>H

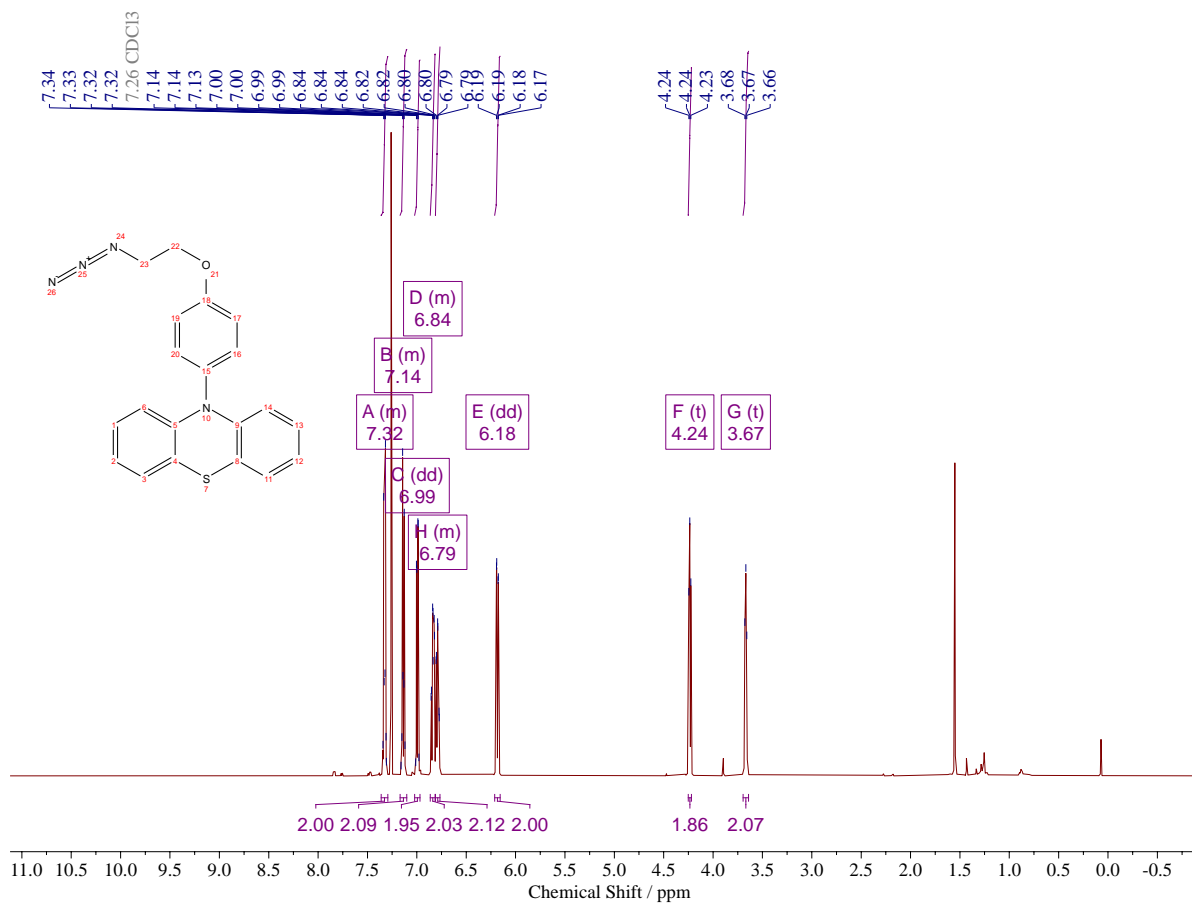

<sup>13</sup>C

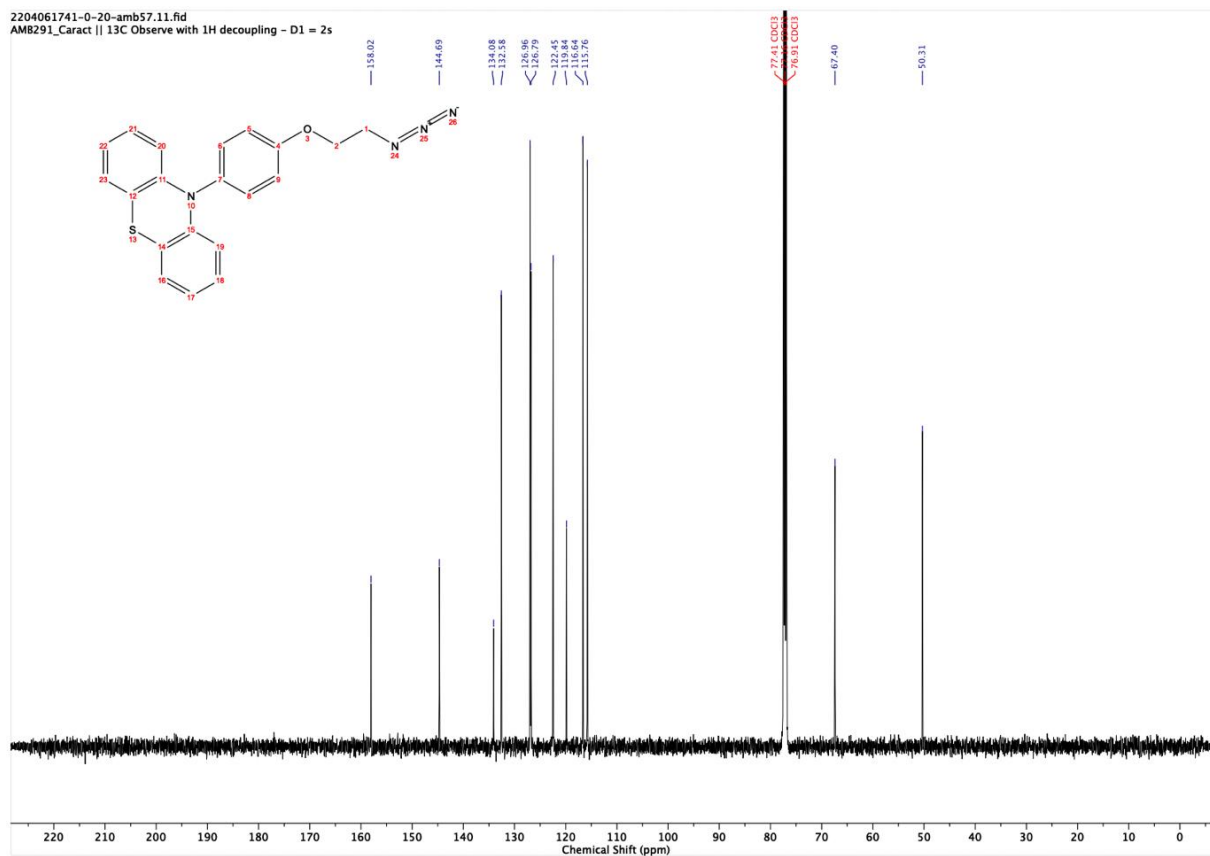

S5 - <sup>1</sup>H

2204221643-0-12-amb57.10.fid  
AMB349\_Caract || 1H Observe

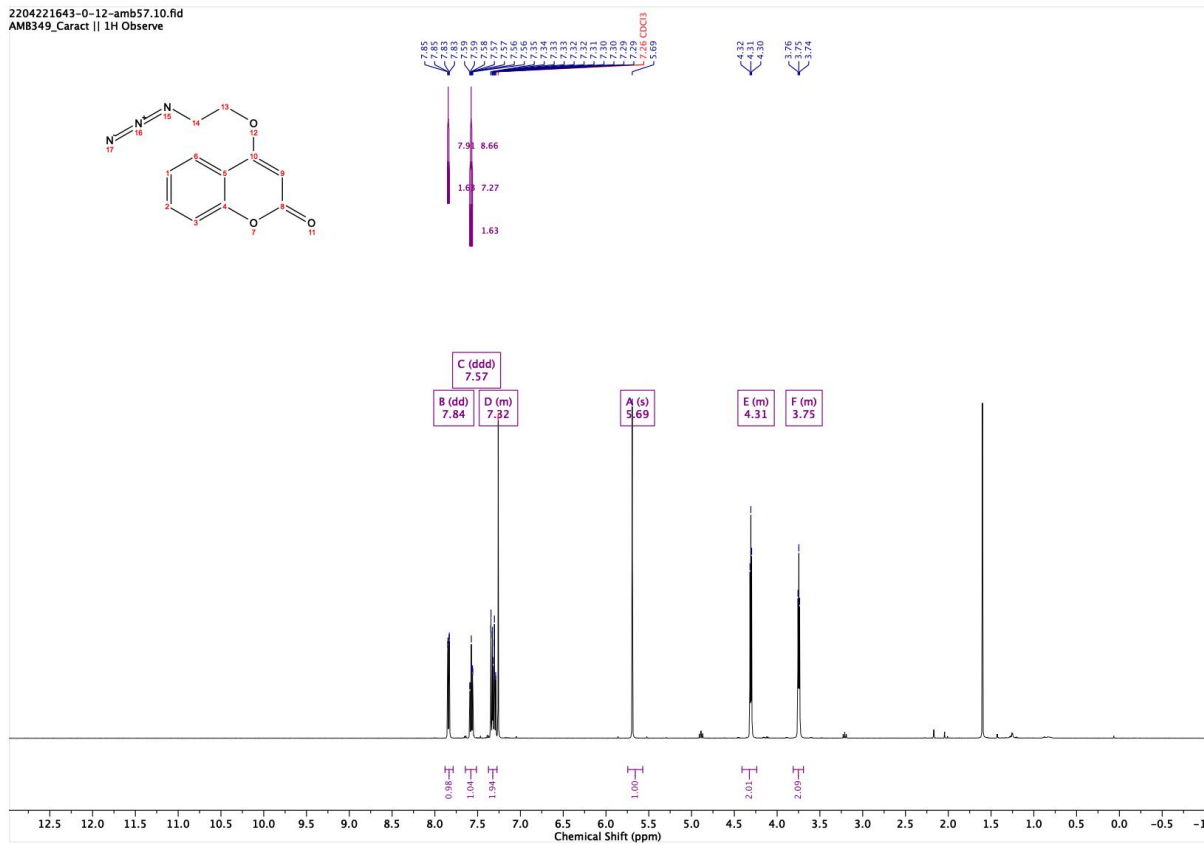

<sup>13</sup>C

2204221643-0-12-amb57.11.fid  
AMB349\_Caract || 13C Observe with 1H decoupling - D1 = 2s

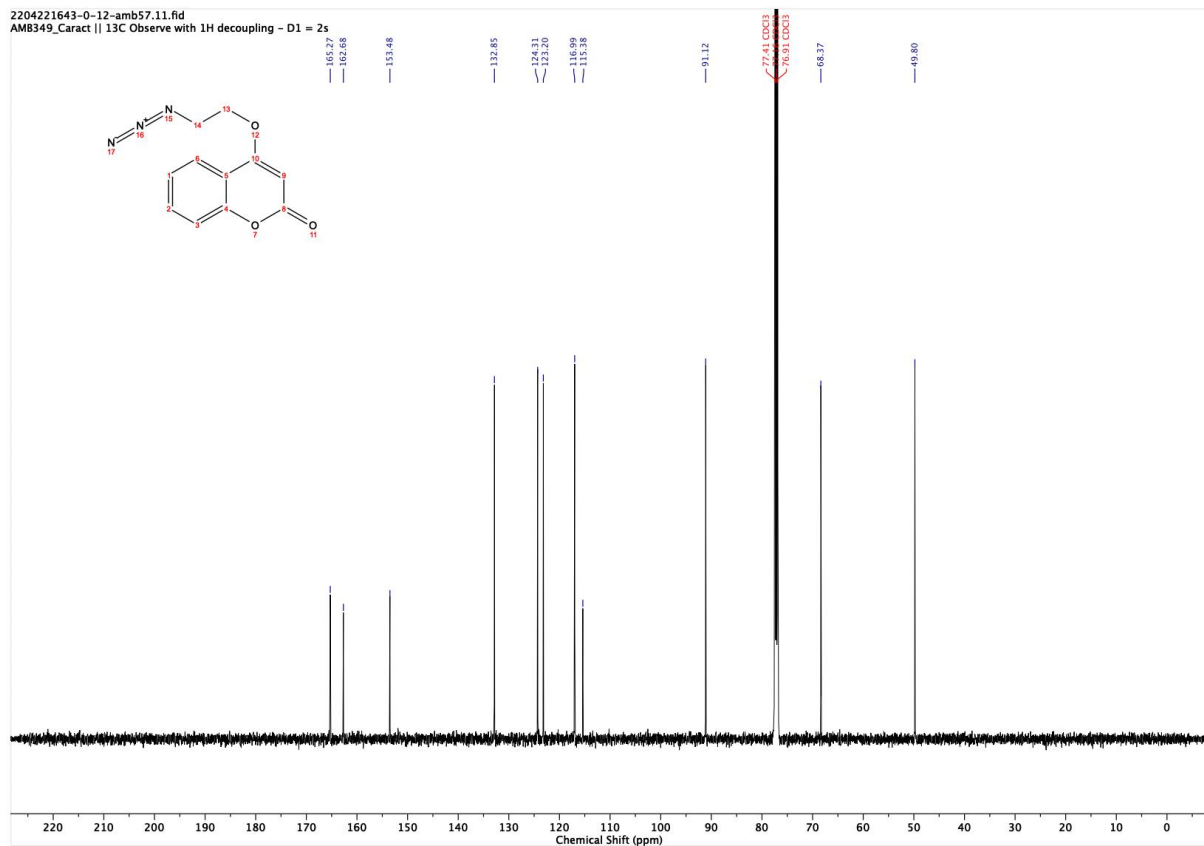

# S6 - <sup>1</sup>H

2403221201-5-4-tr61.10.fid  
JHM AMB 248 || 1H Observe

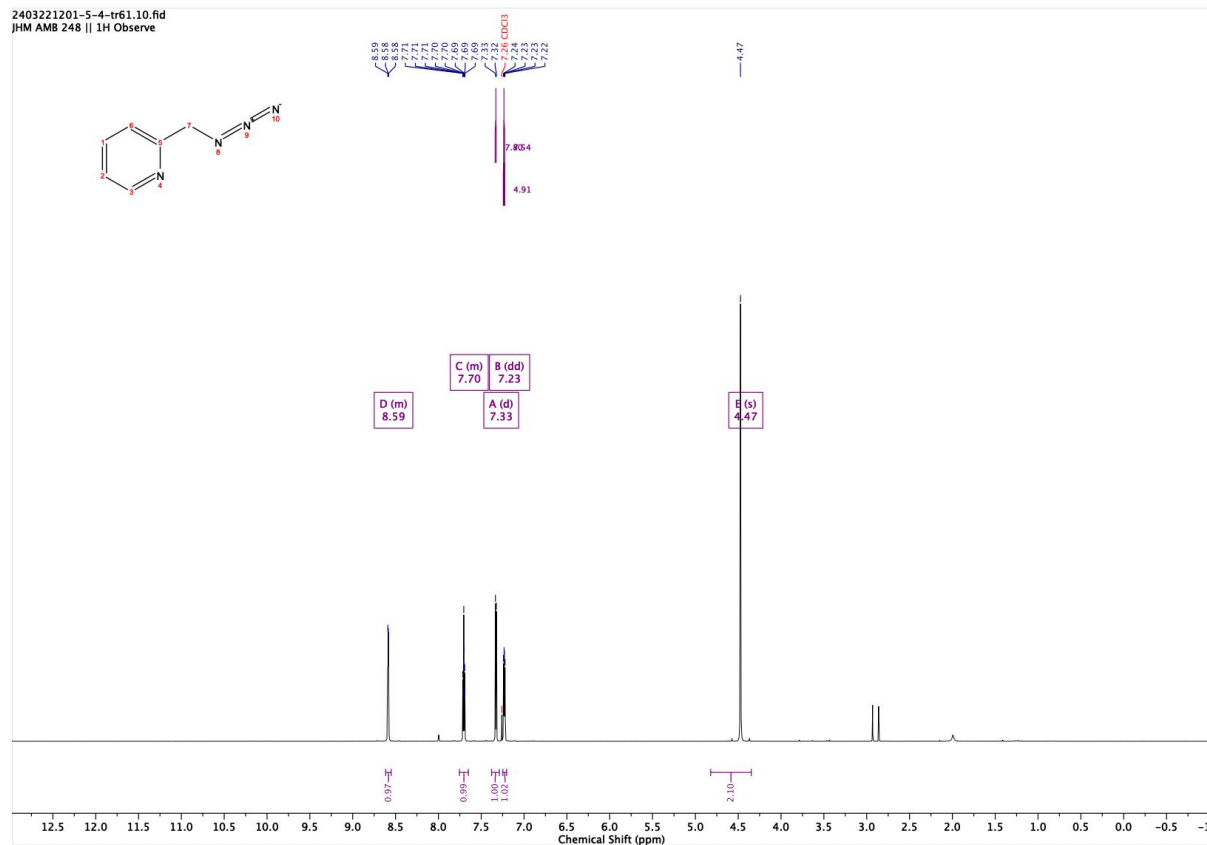

# <sup>13</sup>C DEPTQ

2403221201-5-4-tr61.11.fid  
JHM AMB 248 || 13C Observe with multiplicity editing - DEPTQ

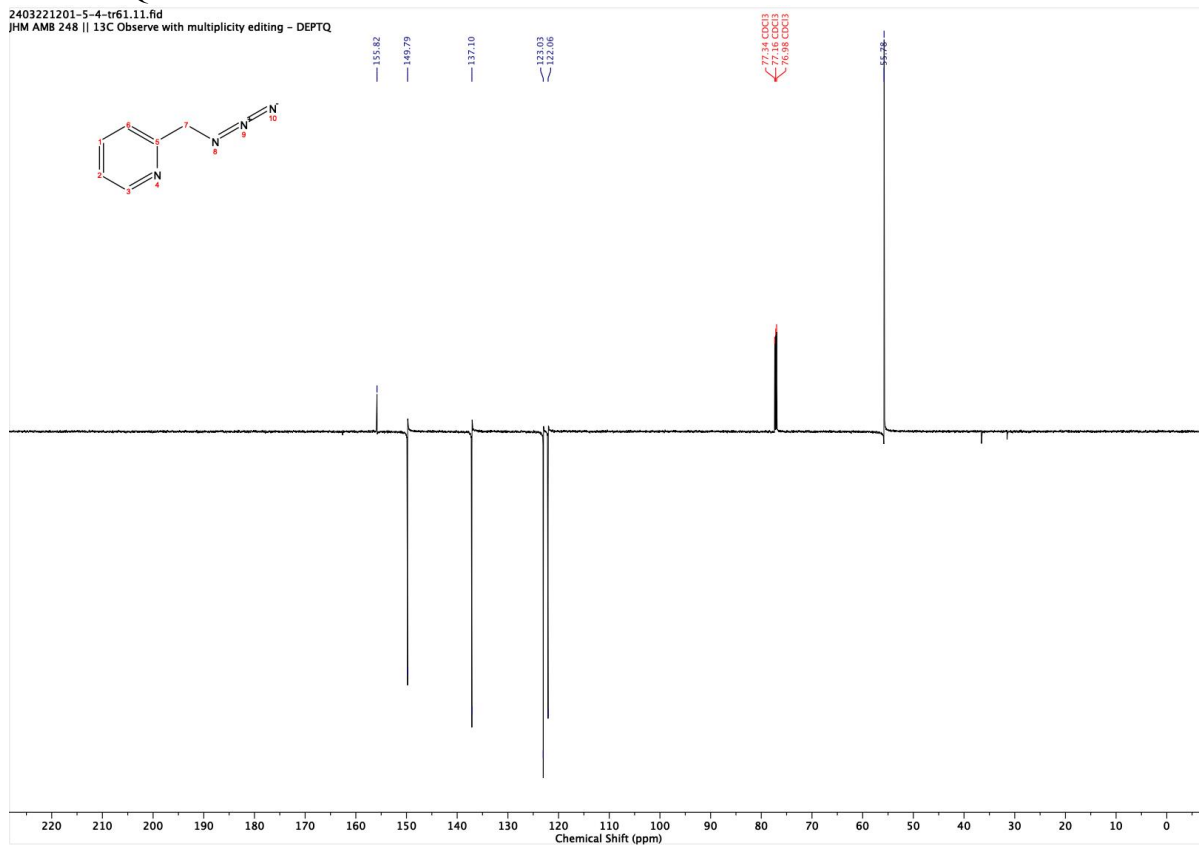

S7 - <sup>1</sup>H

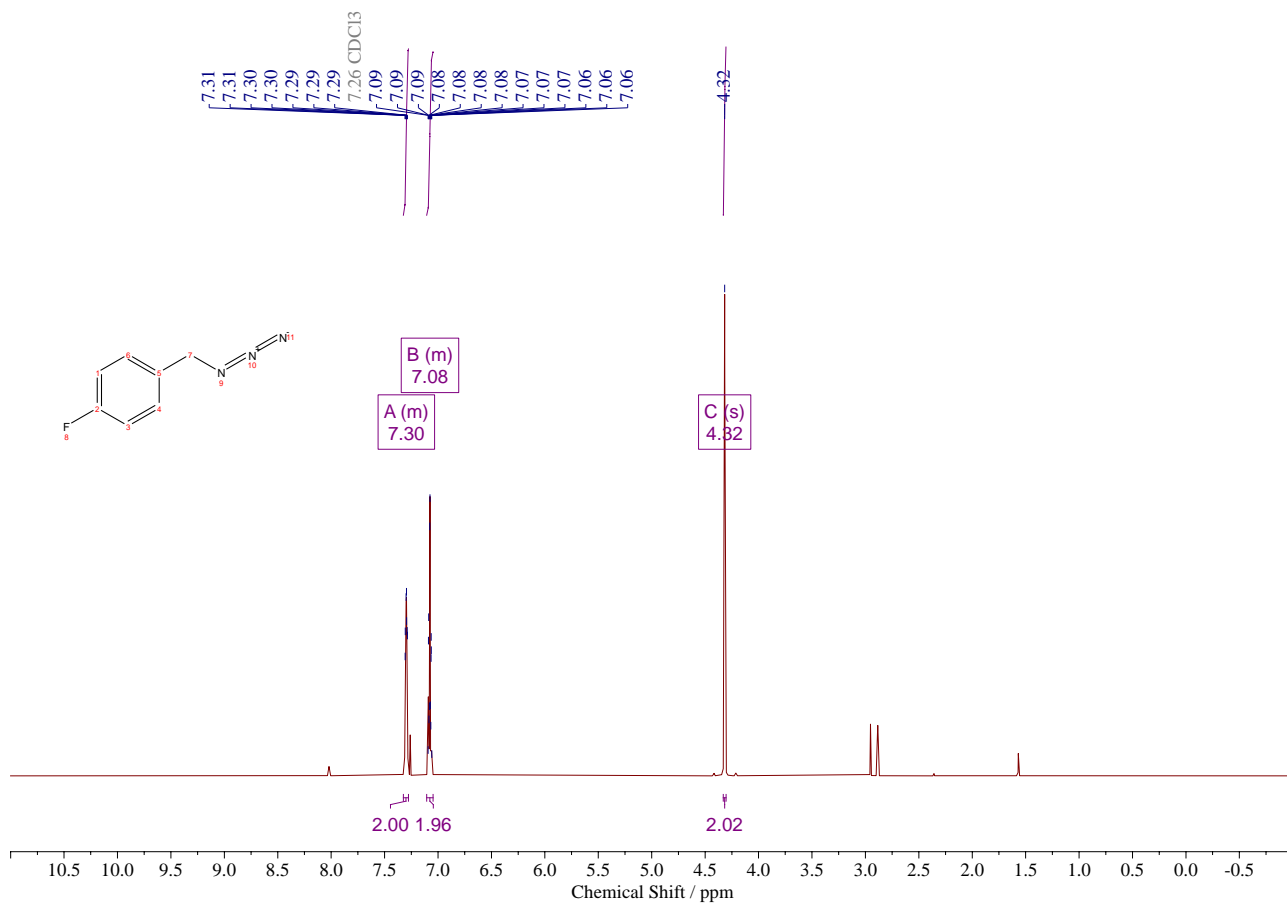

<sup>13</sup>C DEPTQ

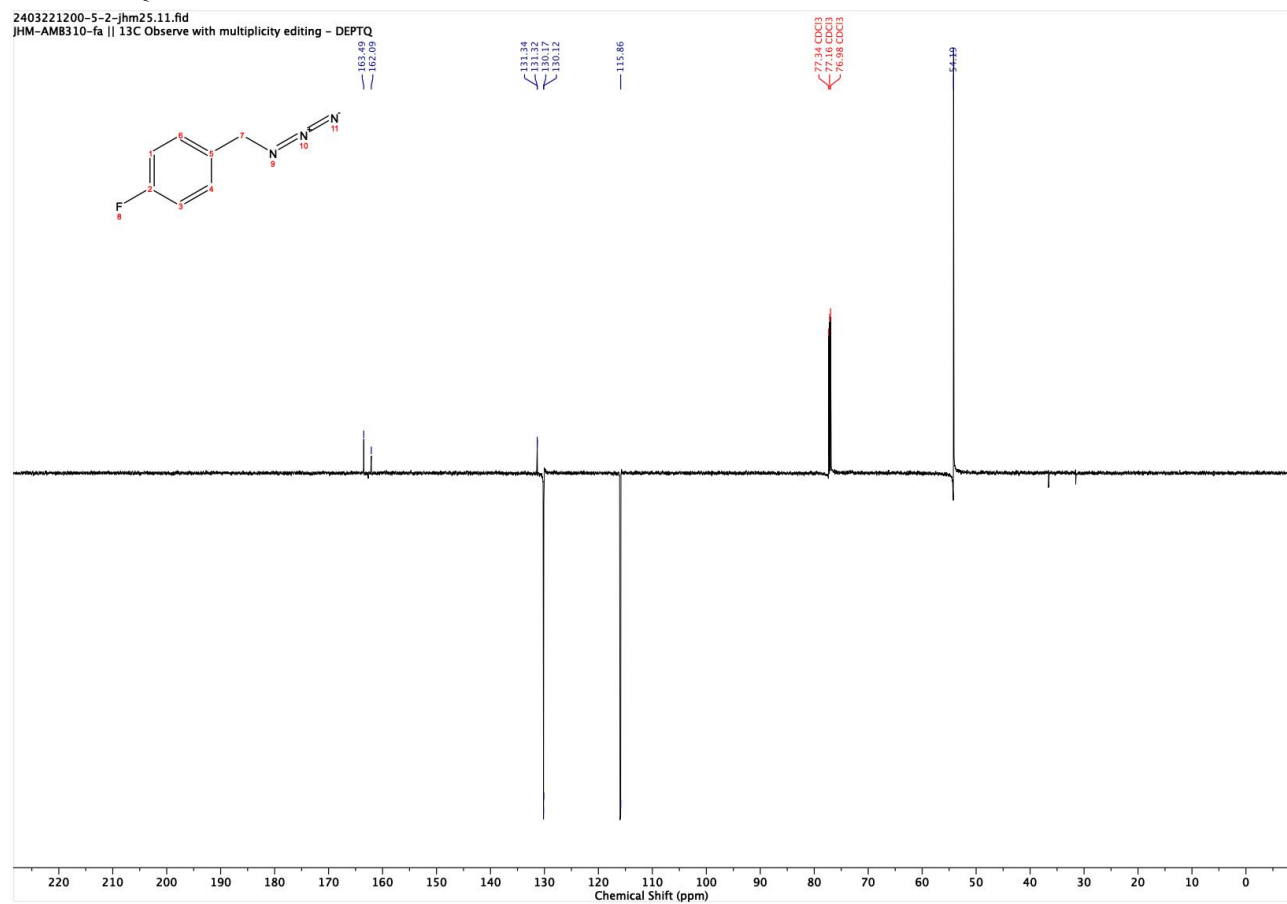

$^{19}\text{F}$

2403221200-5-2-jhm25.12.fid  
JHM-AM8310-fa ||  $^{19}\text{F}$  Observe without  $^1\text{H}$  decoupling - Full Range SW

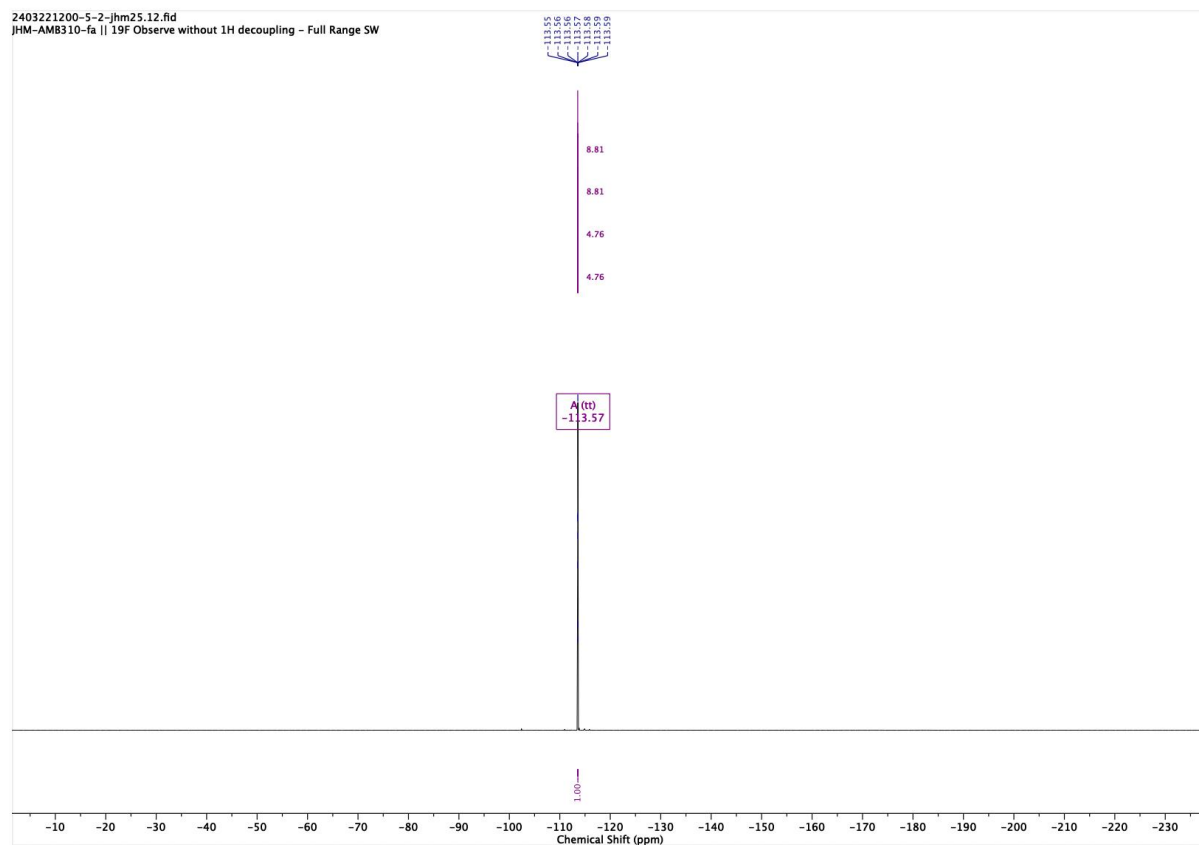

# S8 - <sup>1</sup>H

2403221200-5-3-jhm25.10.fid  
JHM-AMB314-fa || <sup>1</sup>H Observe

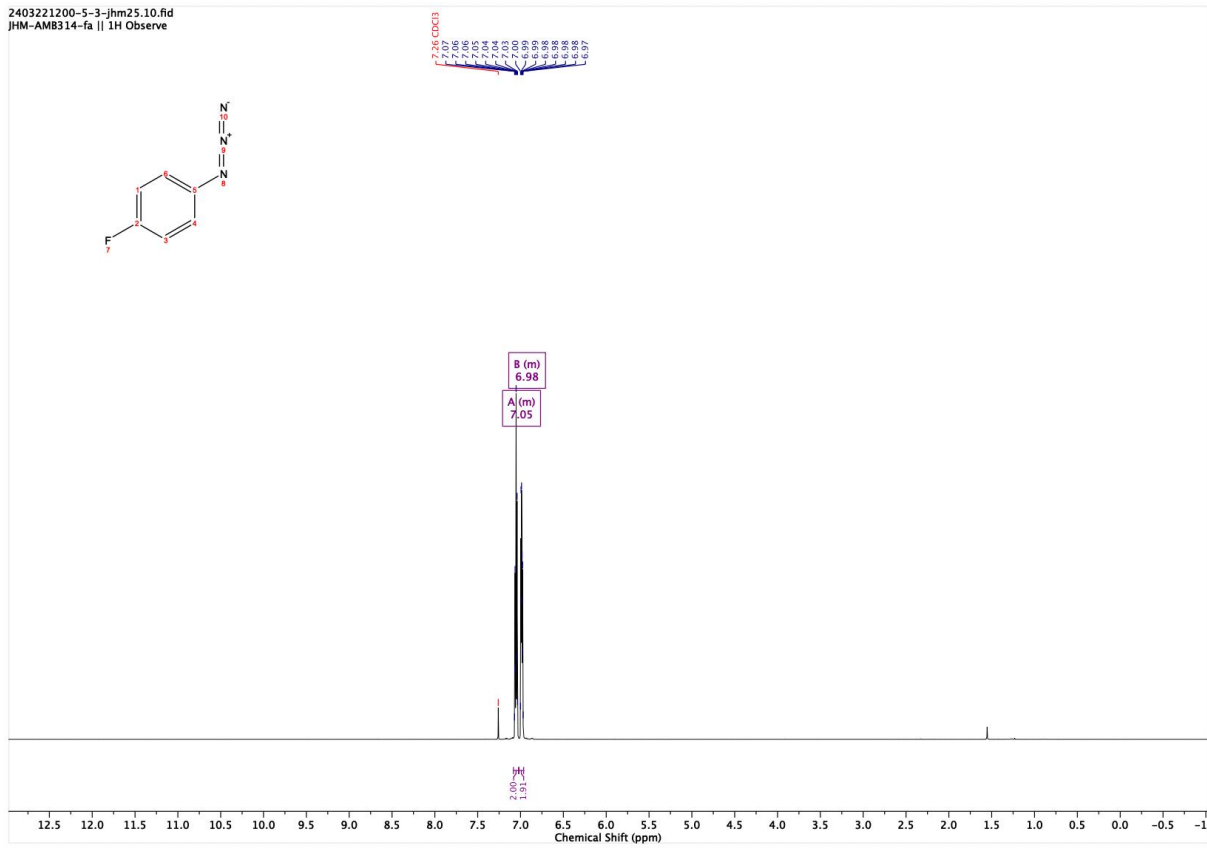

# <sup>13</sup>C DEPTQ

2403221200-5-3-jhm25.11.fid  
JHM-AMB314-fa || <sup>13</sup>C Observe with multiplicity editing - DEPTQ

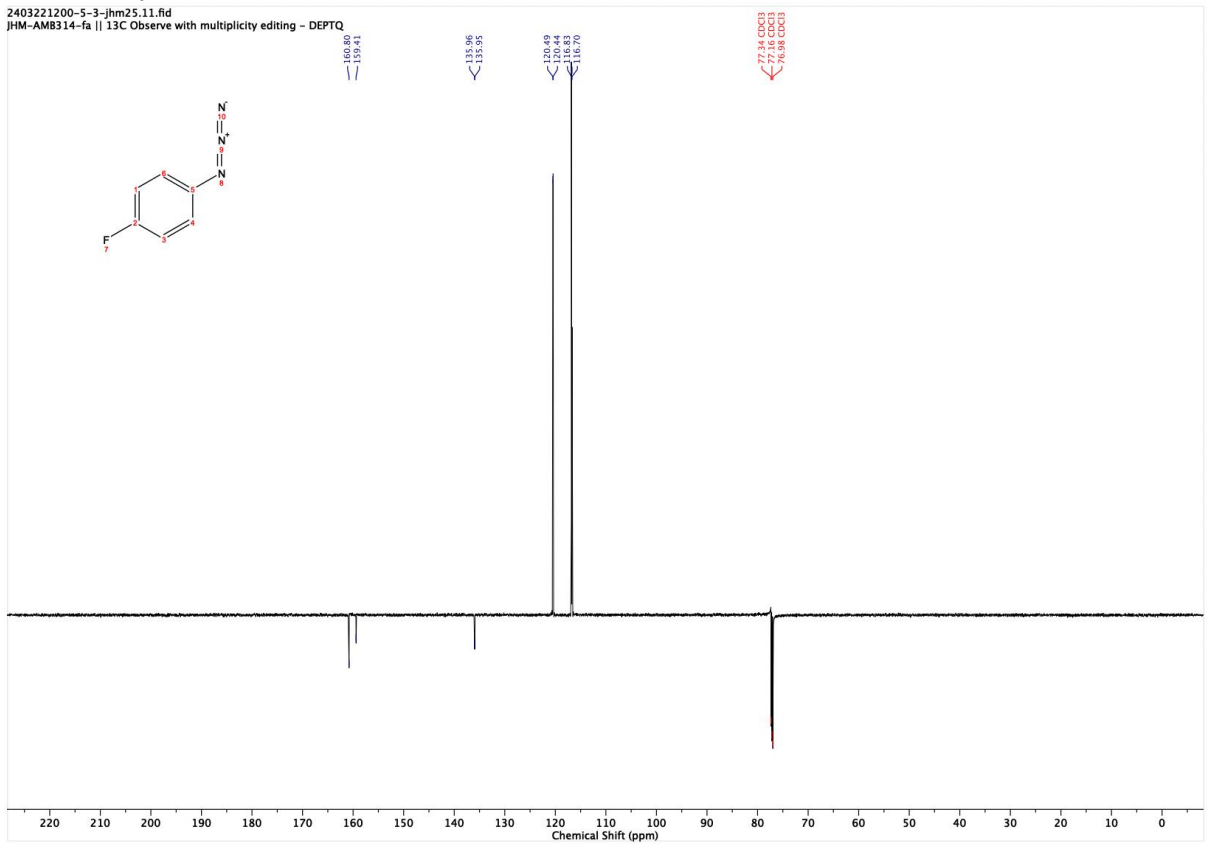





S9 - <sup>1</sup>H

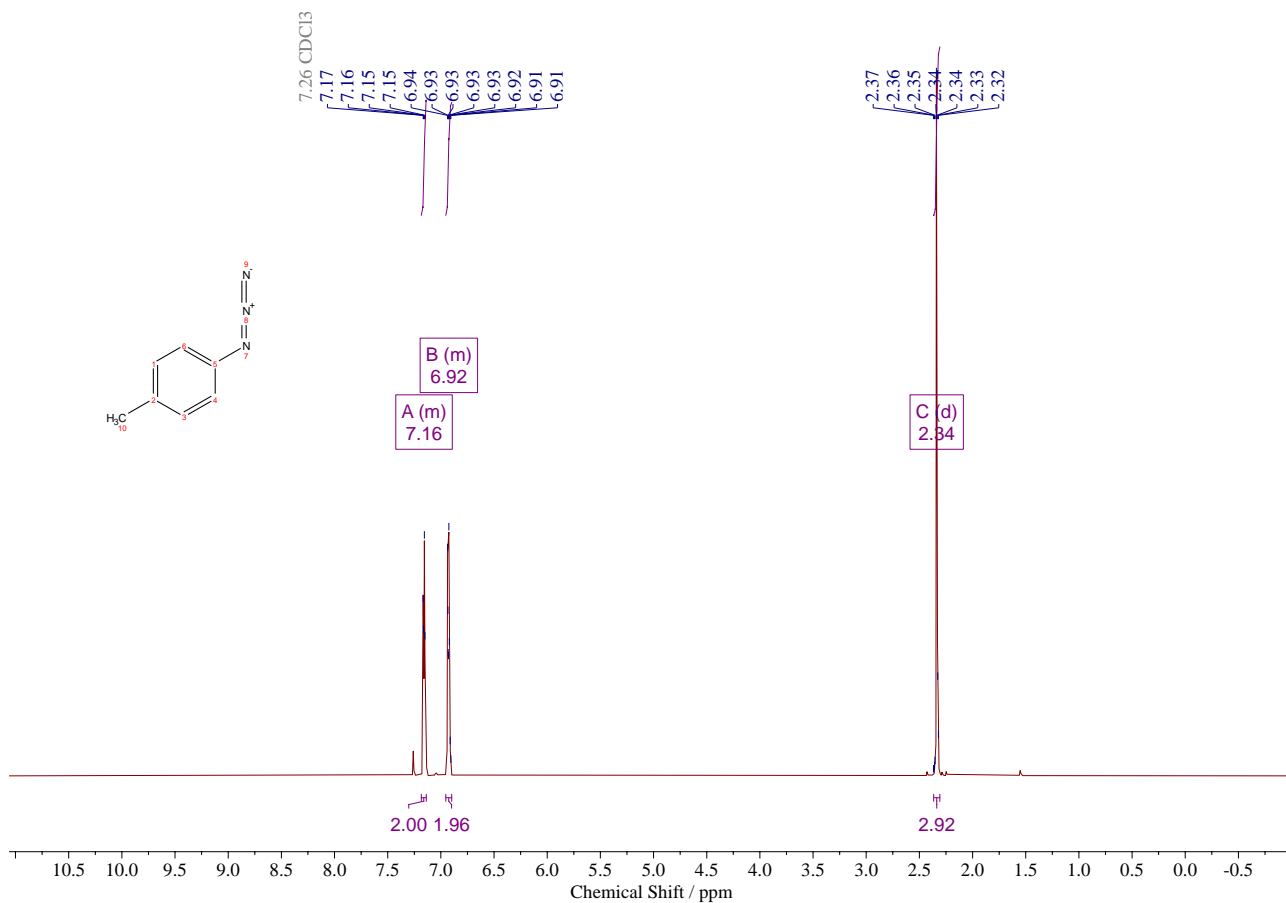

<sup>13</sup>C DEPTQ

2403221201-5-5-tr61.11.fid

JHM AMB 313 || <sup>13</sup>C Observe with multiplicity editing - DEPTQ

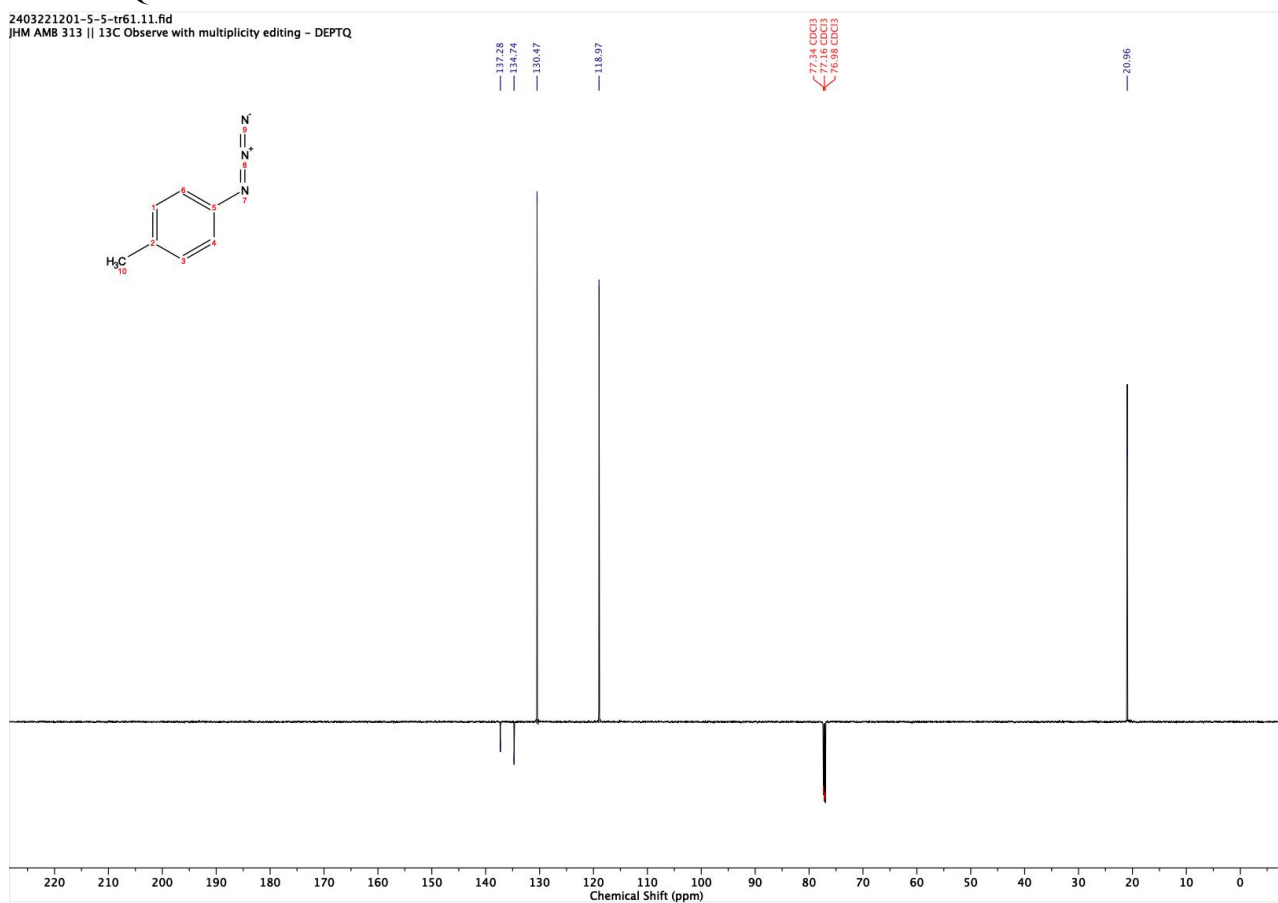

S10 – <sup>1</sup>H

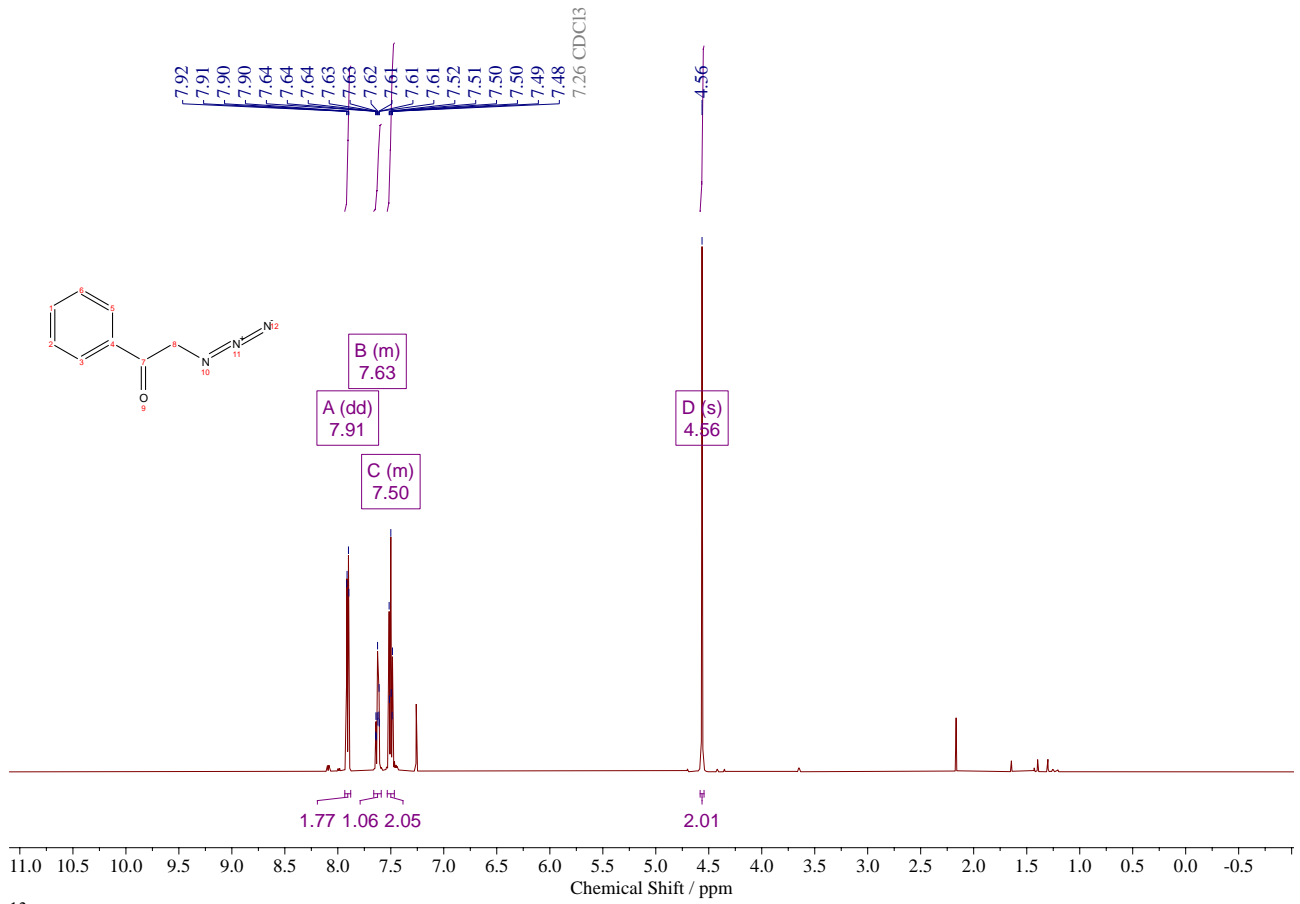

<sup>13</sup>C DEPTQ

2403221202-0-8-jhm25.11.fid

IHM-AMB320-fa || <sup>13</sup>C Observe with multiplicity editing - DEPTQ

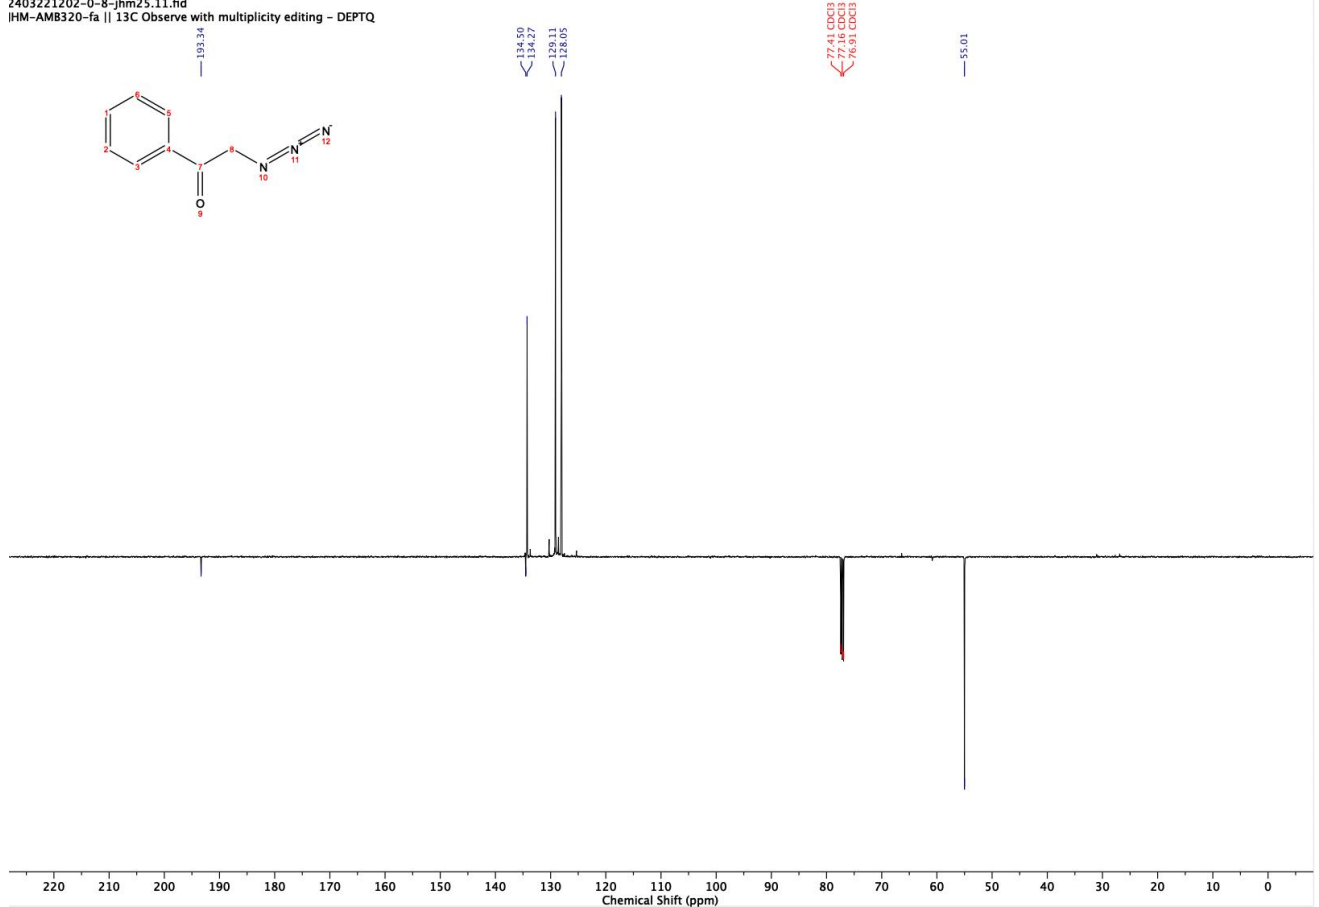

# S11 - <sup>1</sup>H

2401291728-6-2-jhm25.10.fid  
JHM-JMGe15-FA || 1H Observe

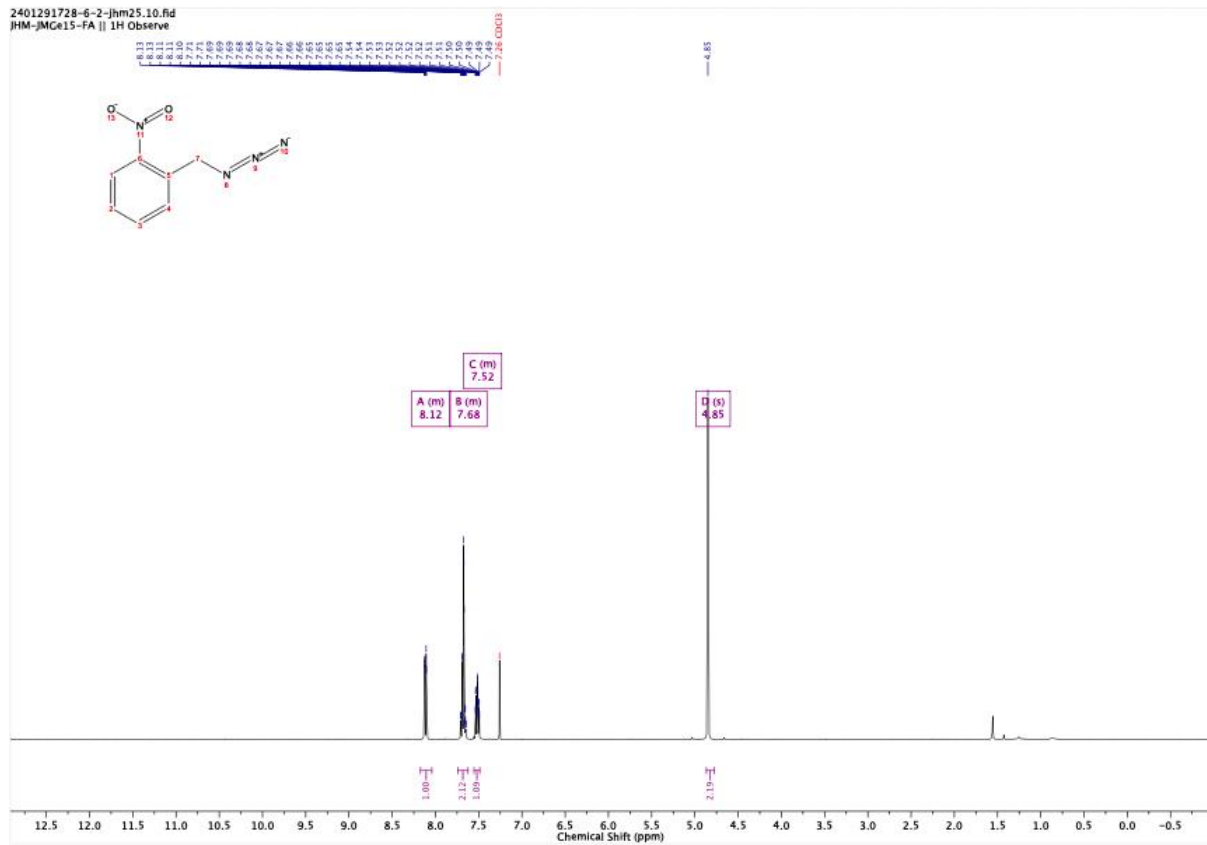

# <sup>13</sup>C DEPTQ

2401291728-6-2-jhm25.11.fid  
JHM-JMGe15-FA || 13C Observe with multiplicity editing - DEPTQ

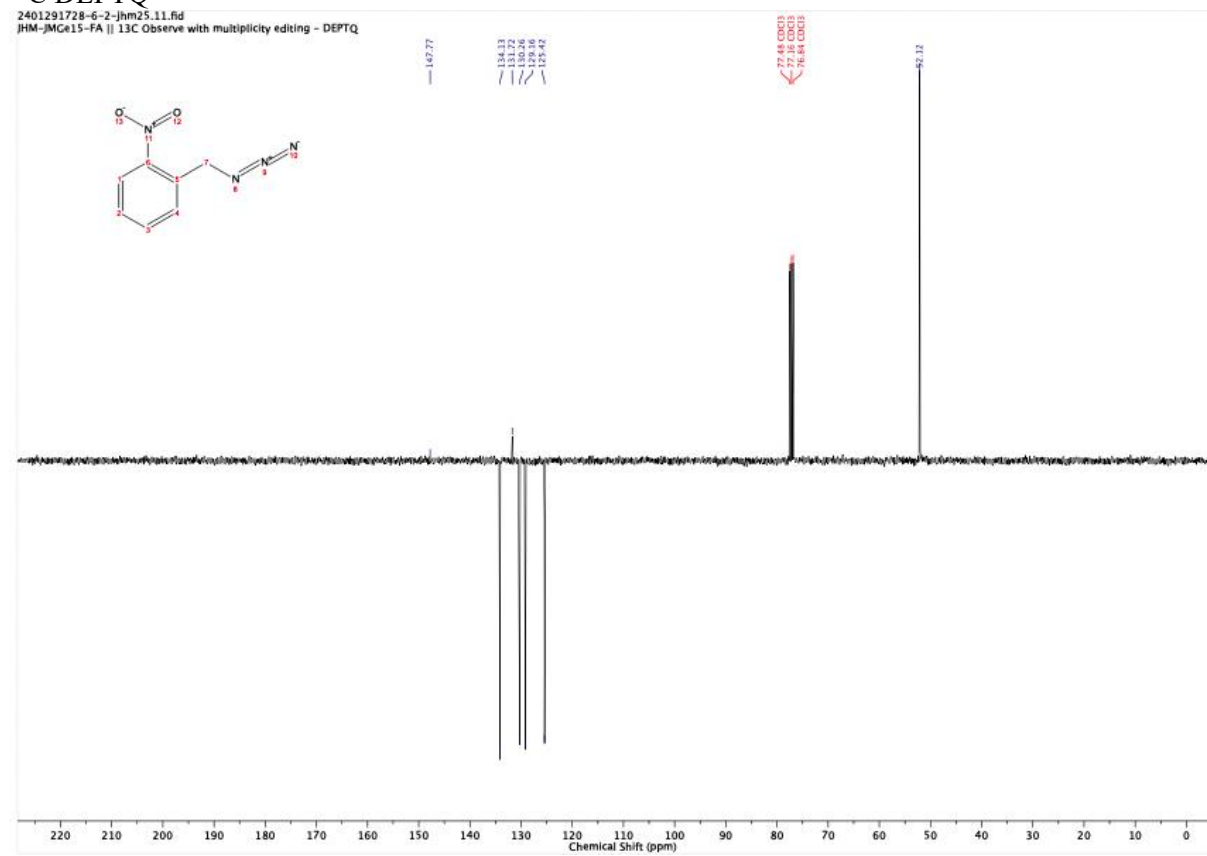



# S13 - <sup>1</sup>H

2402011805-3-15-jhm25.10.fid  
JHM2277-fa || 1H Observe

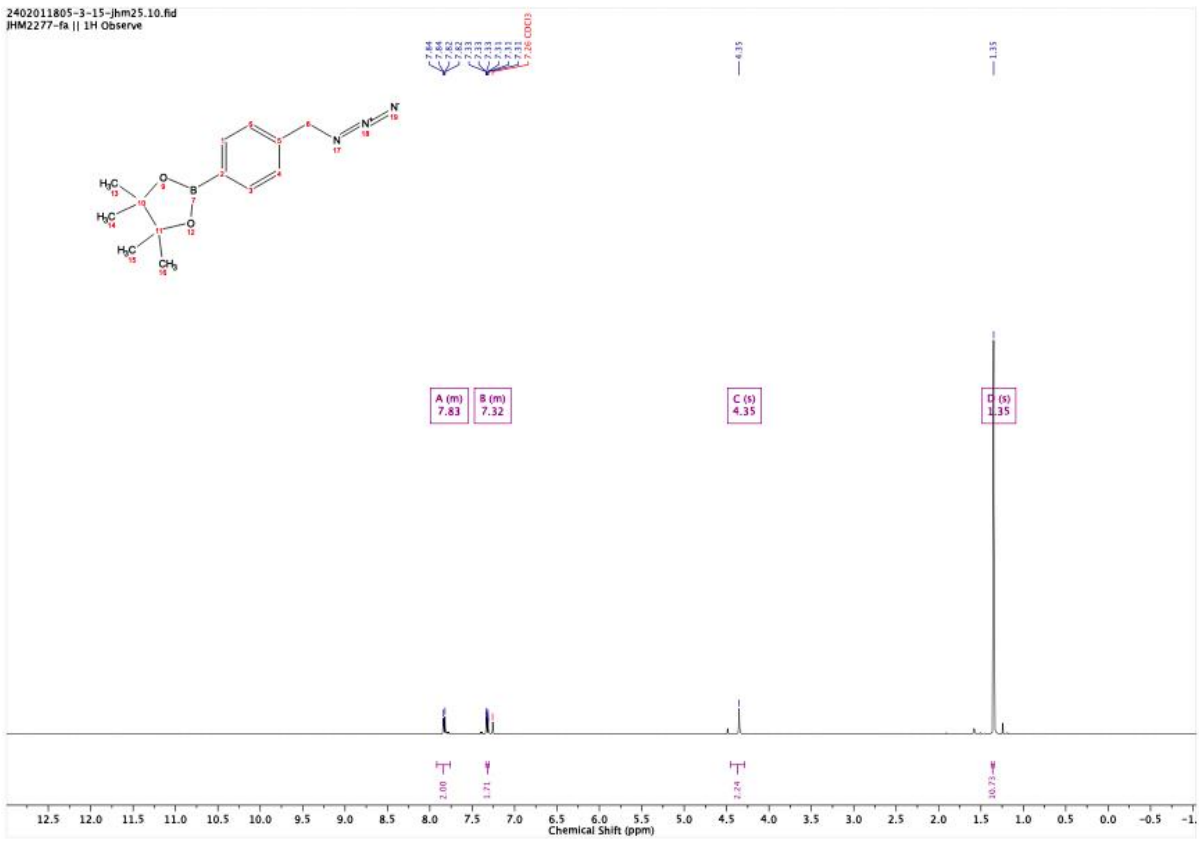

# <sup>13</sup>C DEPTQ

2402011805-3-15-jhm25.11.fid  
JHM2277-fa || 13C Observe with multiplicity editing - DEPTQ

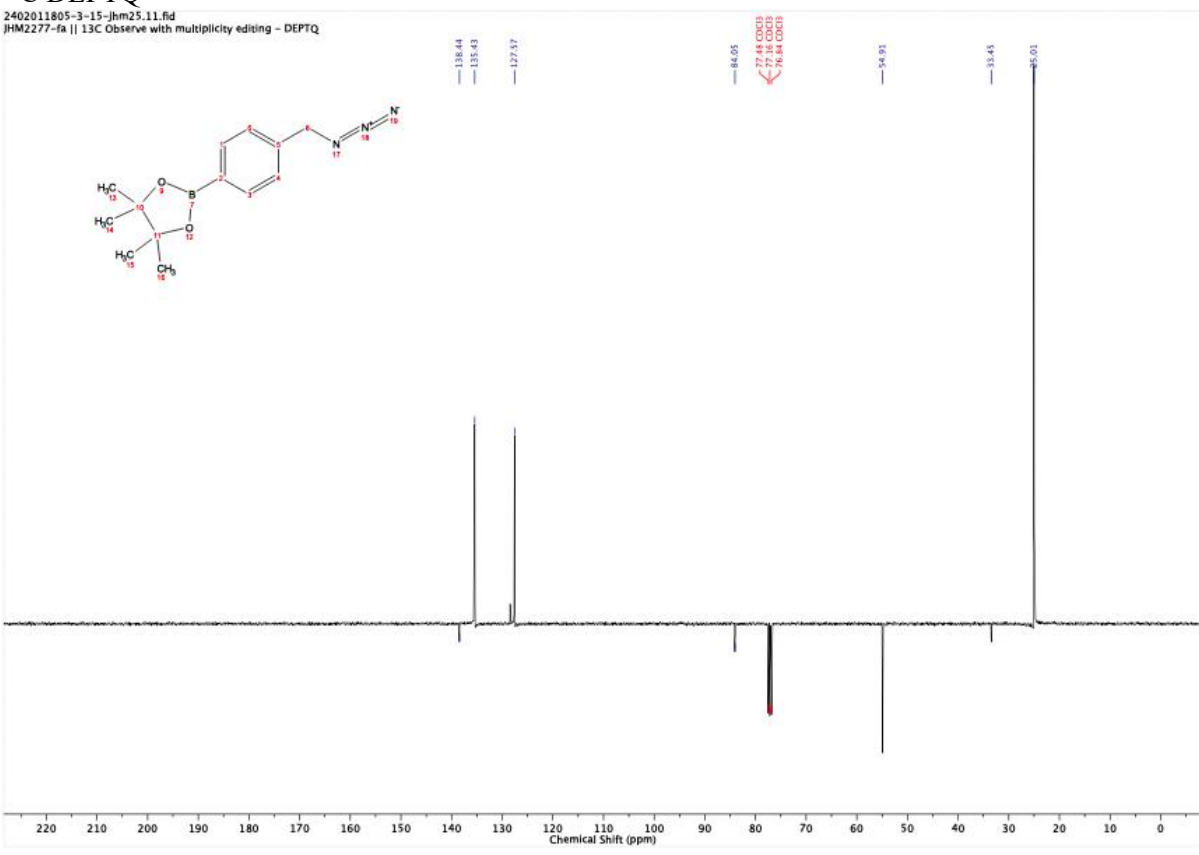

$^{11}\text{B}$

2402011805-3-15-jhm25.12.fid  
jhm2277-fa | 11B Observe - SW=250ppm (Et2O,8F3/CDC13 = 0ppm)

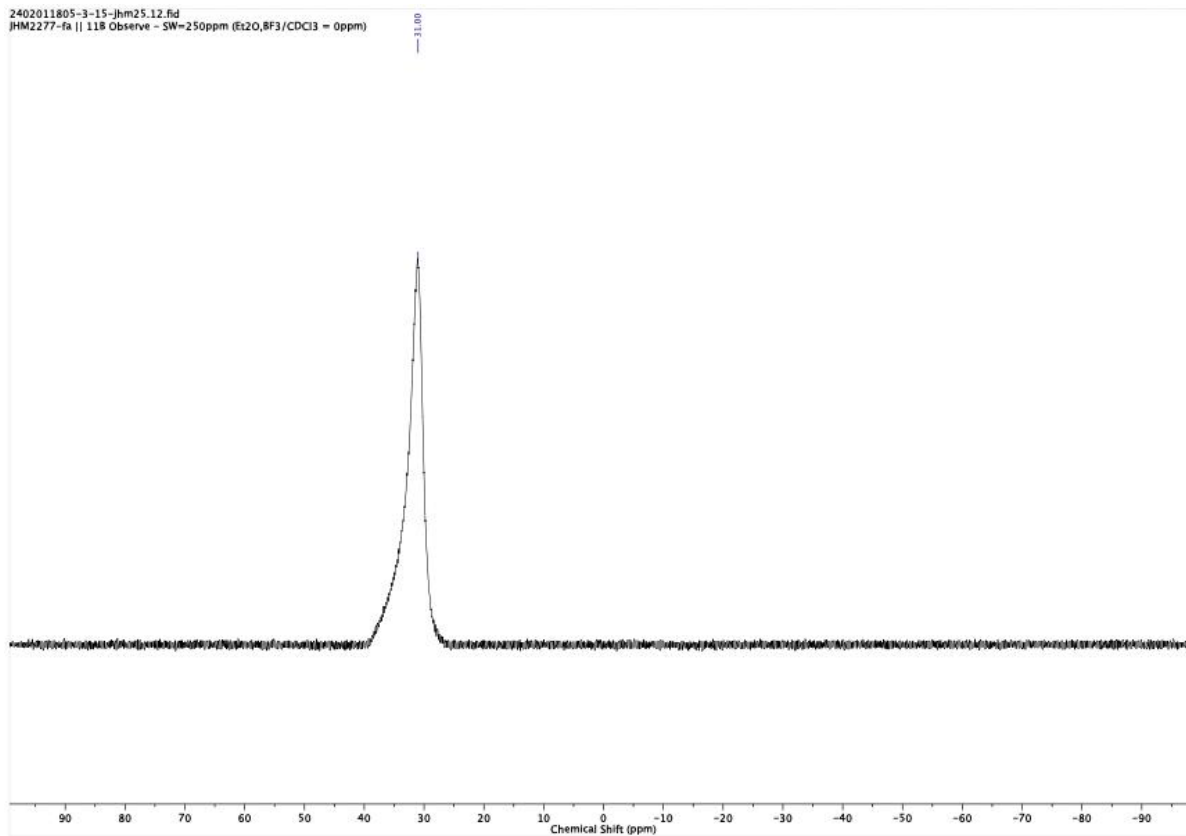



# S15 - <sup>1</sup>H

2402071748-5-9-jhm25.10.fid  
jhm-jmGe34-FA || 1H Observe

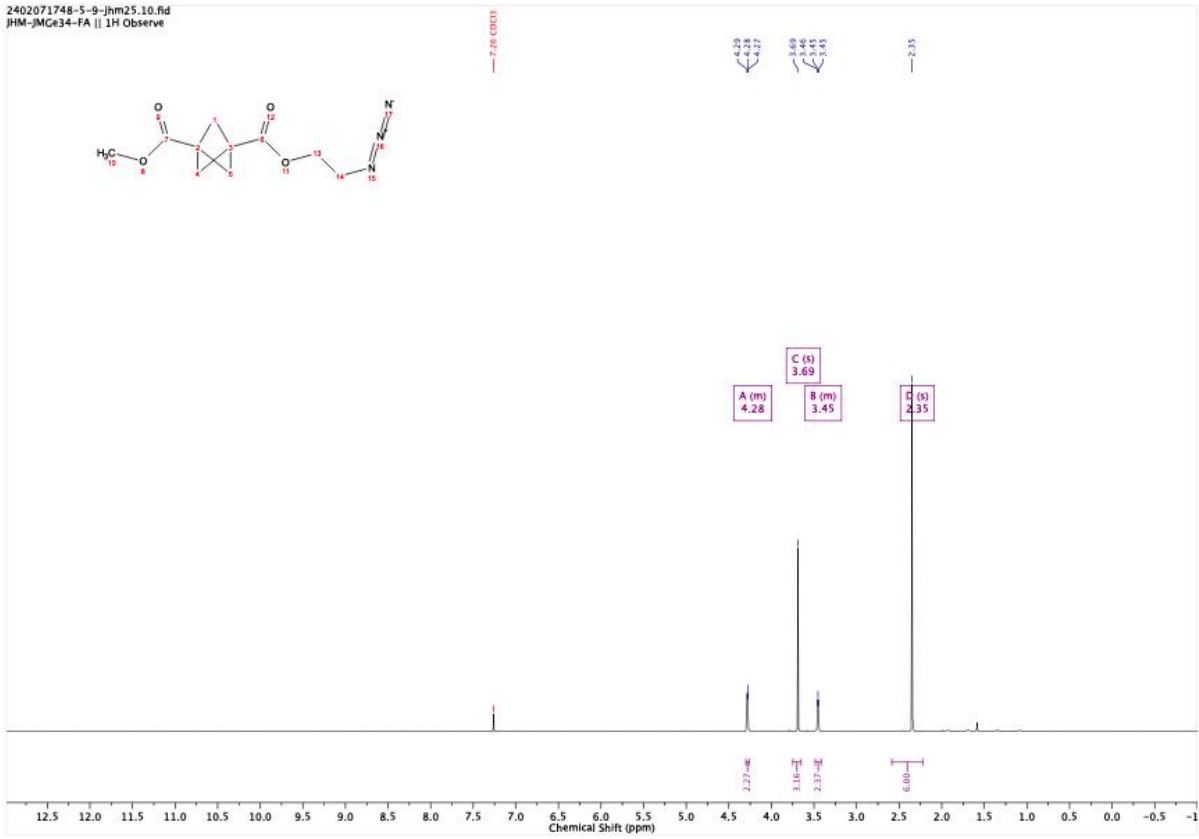

# <sup>13</sup>C DEPTQ

2402071748-5-9-jhm25.11.fid  
jhm-jmGe34-FA || 13C Observe with multiplicity editing - DEPTQ

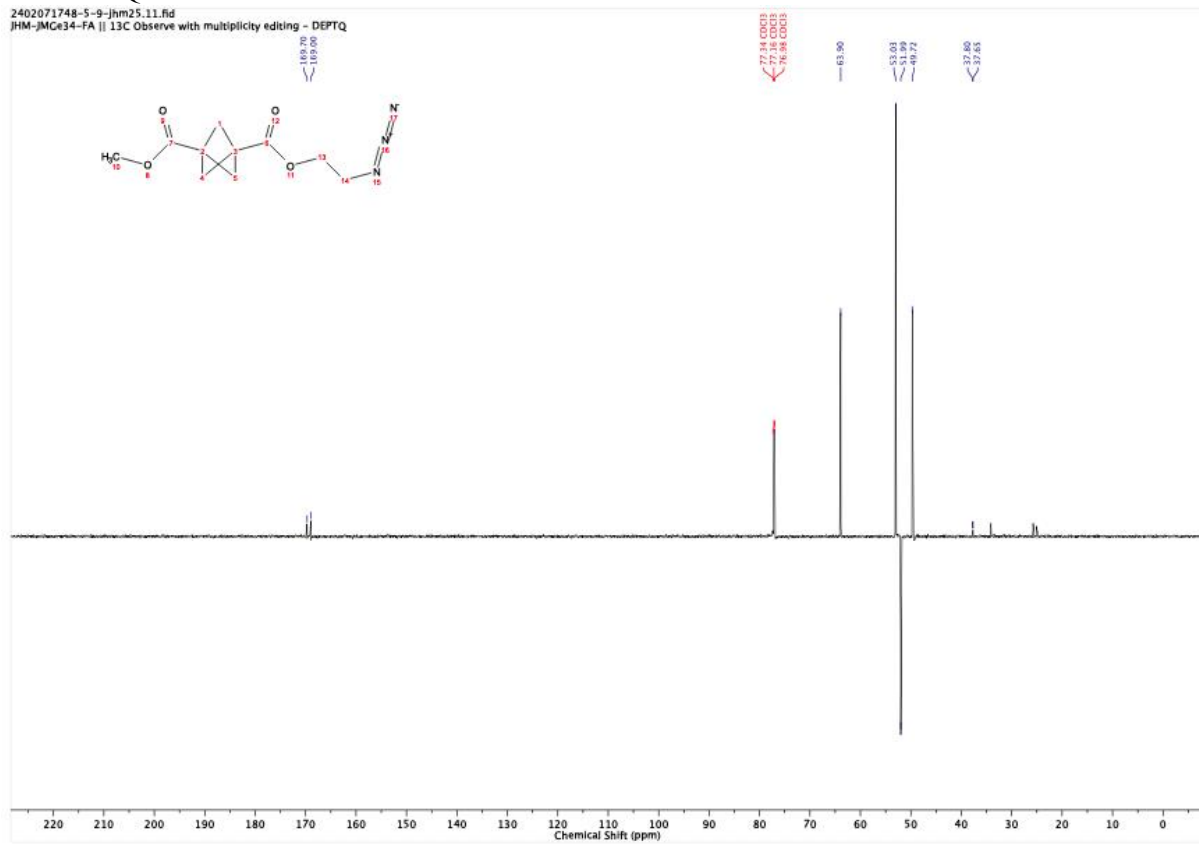





# S17 - <sup>1</sup>H

2402081736-5-4-jhm25.10.fid  
HM-JMGe35-Remf-FA || 1H Observe

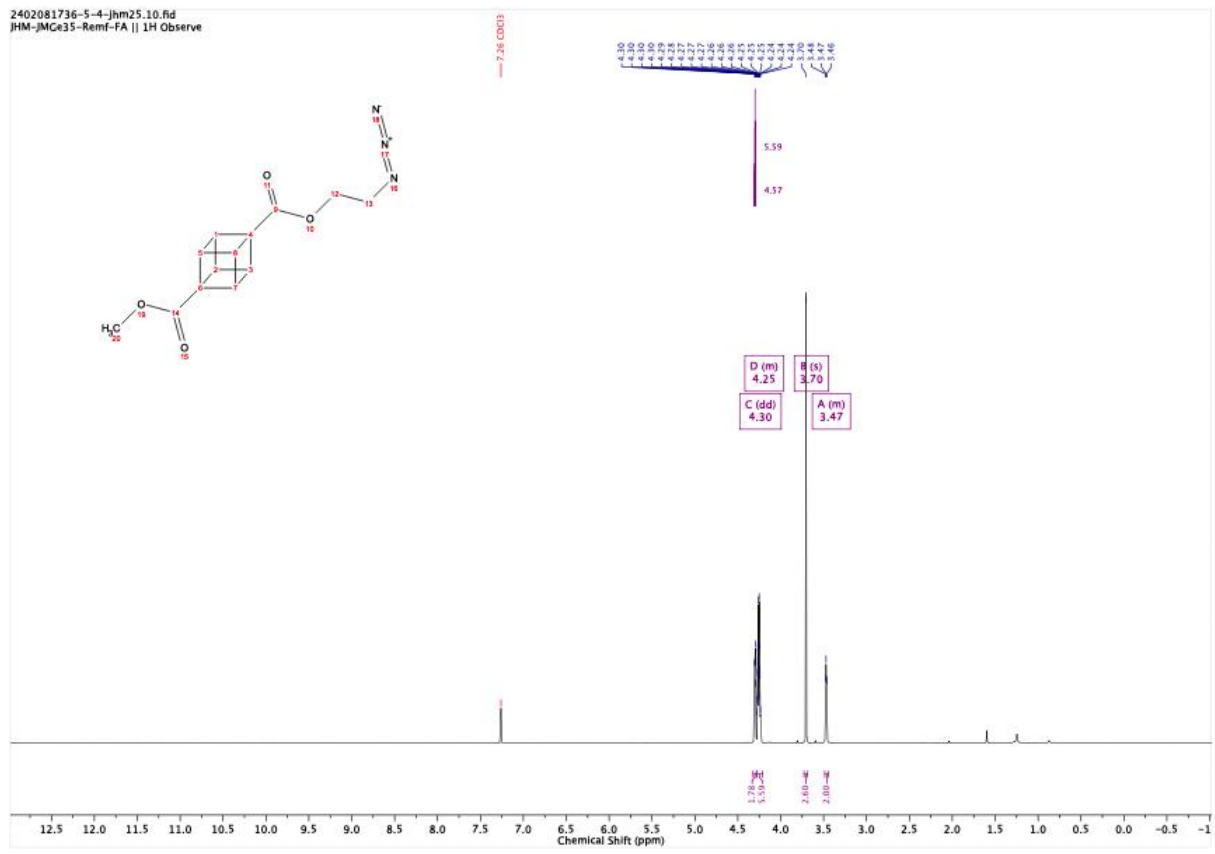

# <sup>13</sup>C DEPTQ

2402081736-5-4-jhm25.11.fid  
HM-JMGe35-Remf-FA || 13C Observe with multiplicity editing - DEPTQ

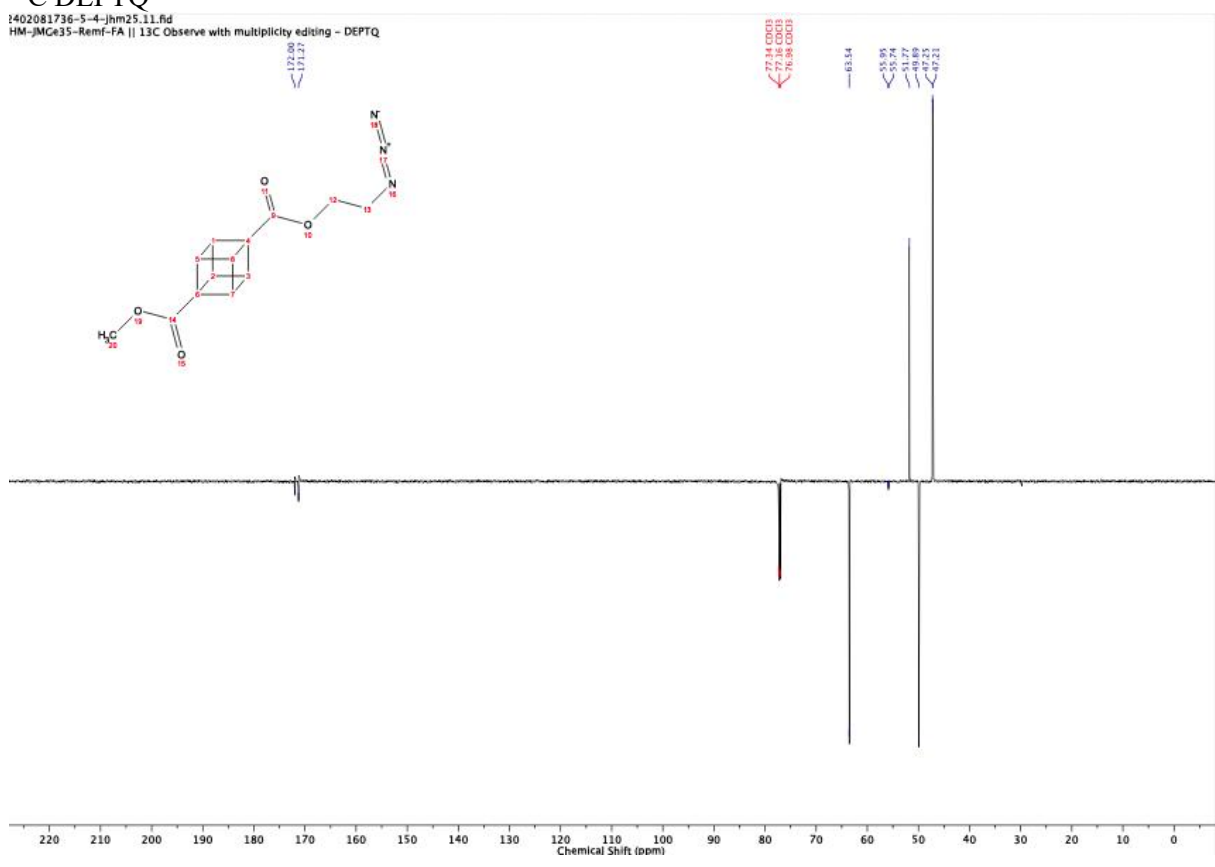

# S18 - <sup>1</sup>H

2311071734-6-23-jhm25.10.fid  
JHM2182-fa || 1H Observe

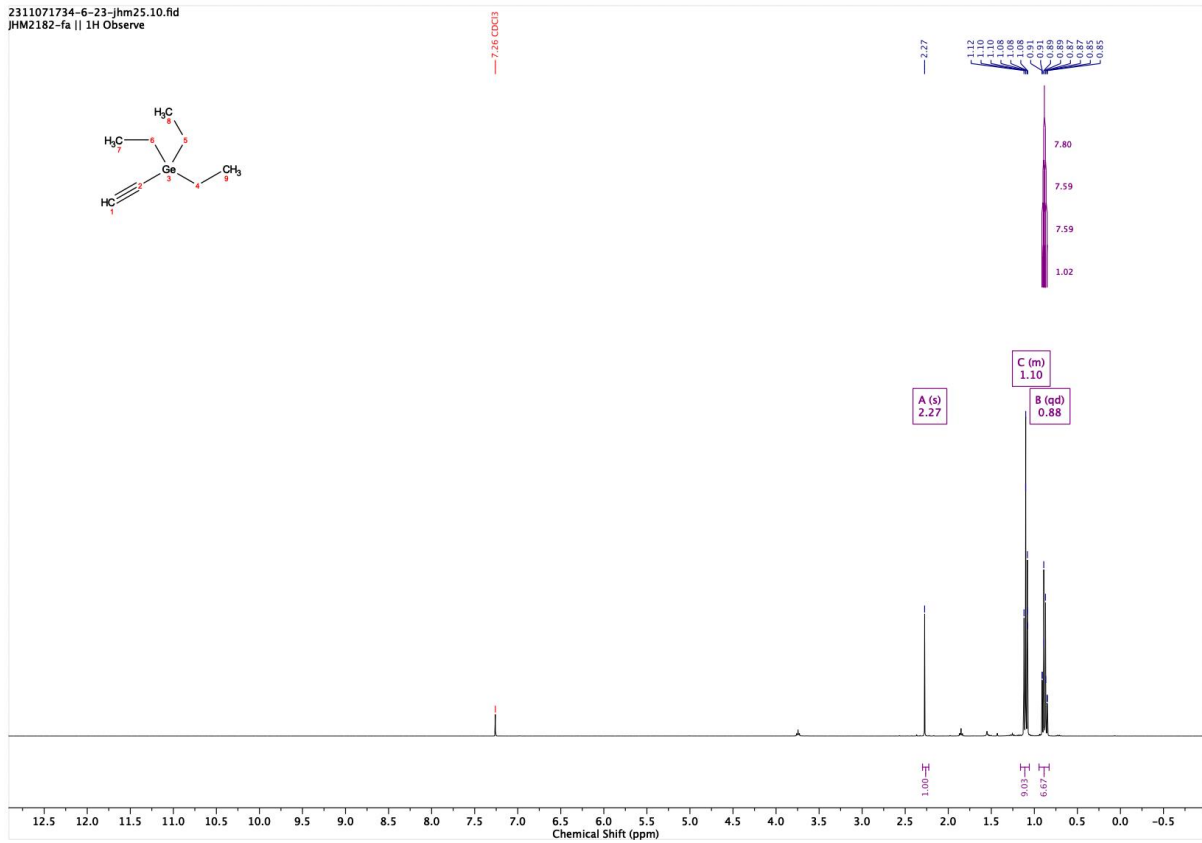

# <sup>13</sup>C DEPTQ

2311071734-6-23-jhm25.11.fid  
JHM2182-fa || 13C Observe with multiplicity editing - DEPTQ

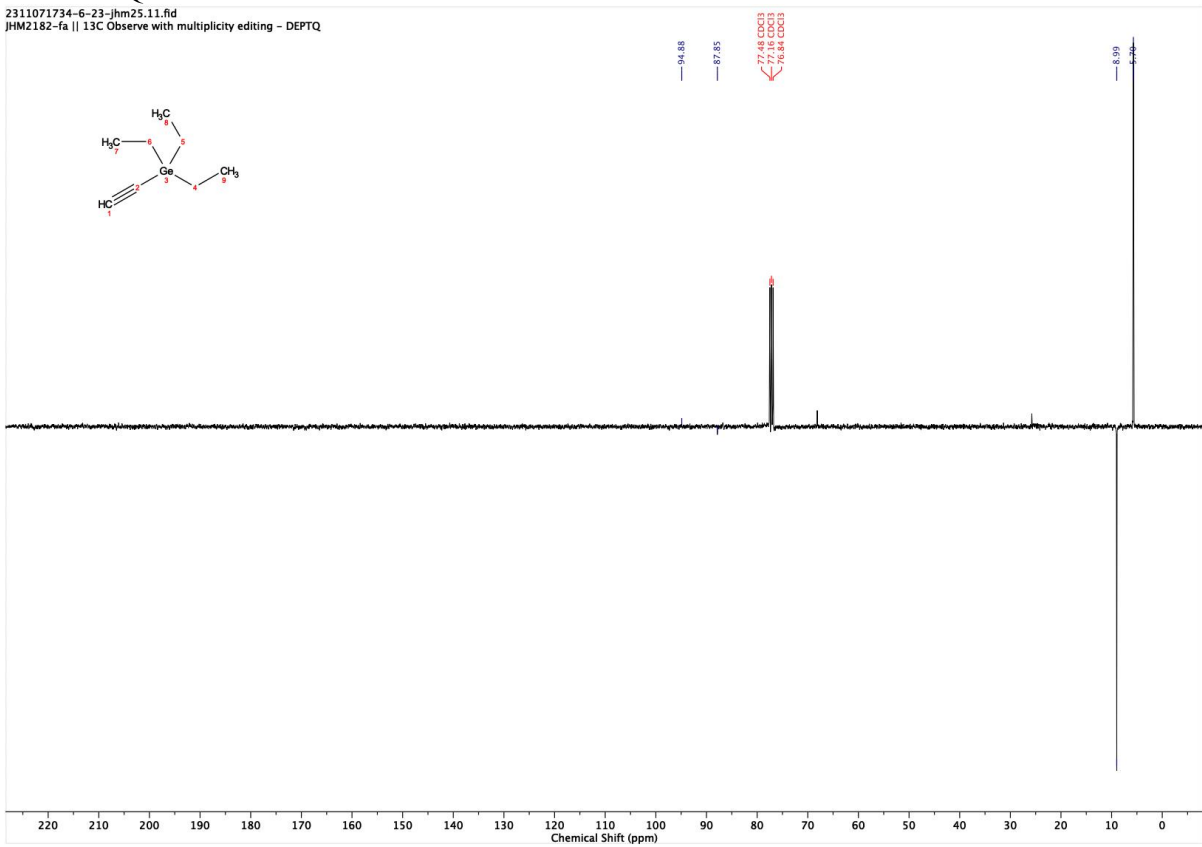

# S19 - <sup>1</sup>H

2401241745-0-26-jhm25.20.fid  
JHM-JMGe04-fa || 1H Observe

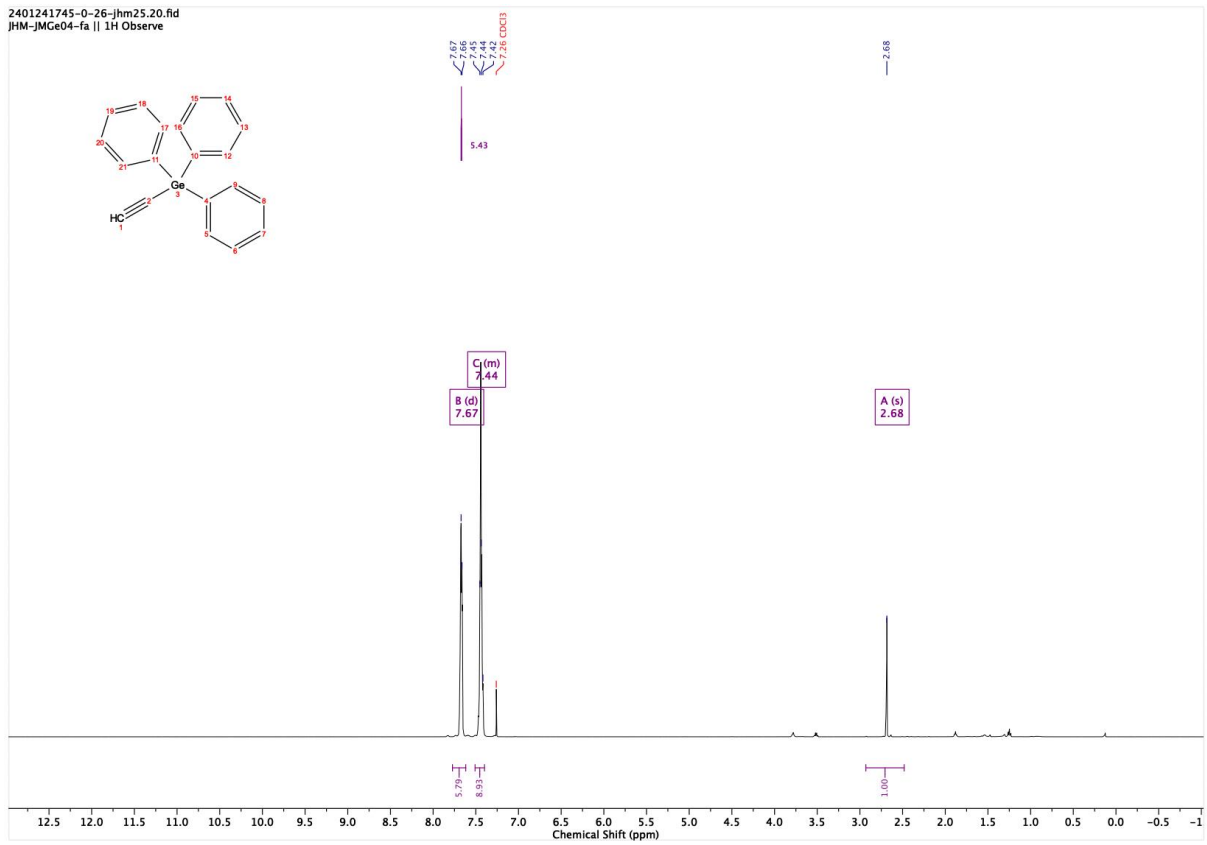

# <sup>13</sup>C DEPTQ

2401241745-0-26-jhm25.21.fid  
JHM-JMGe04-fa || 13C Observe with multiplicity editing - DEPTQ

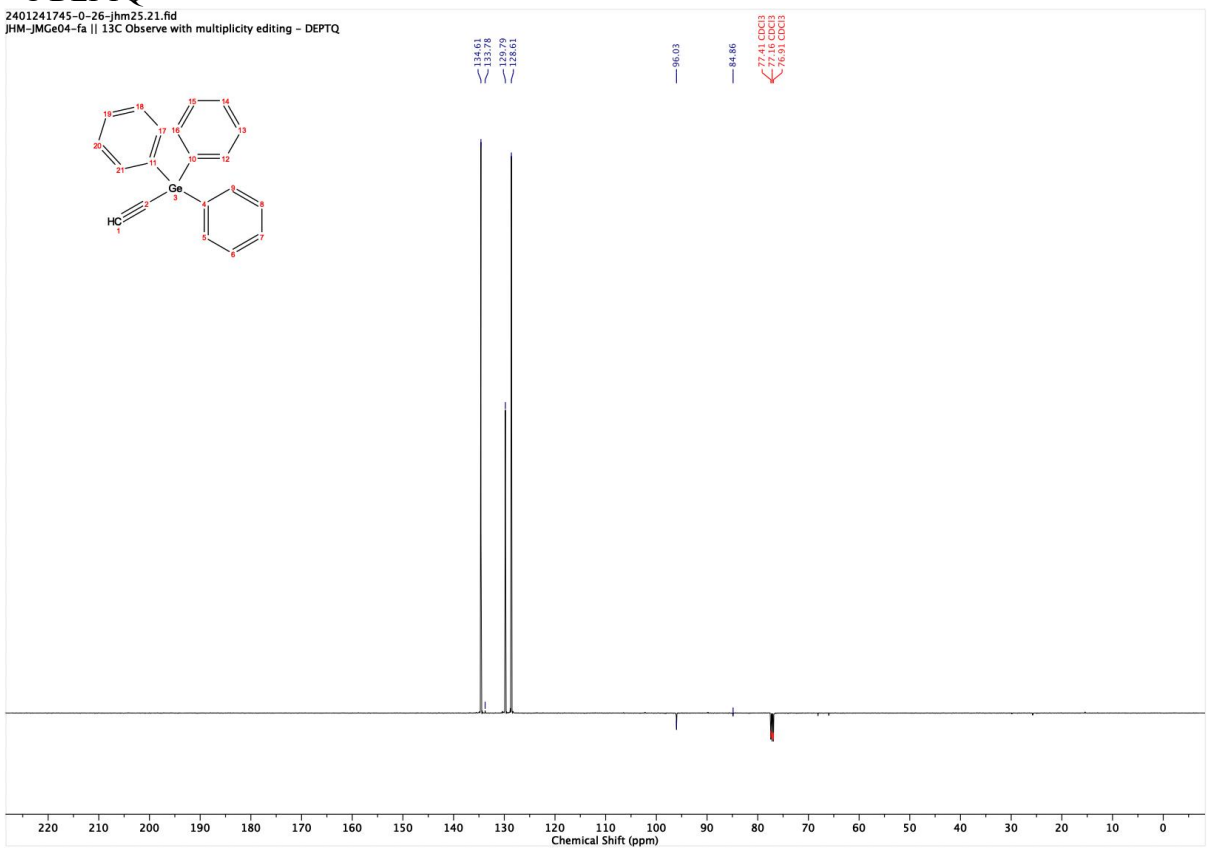

1 - <sup>1</sup>H

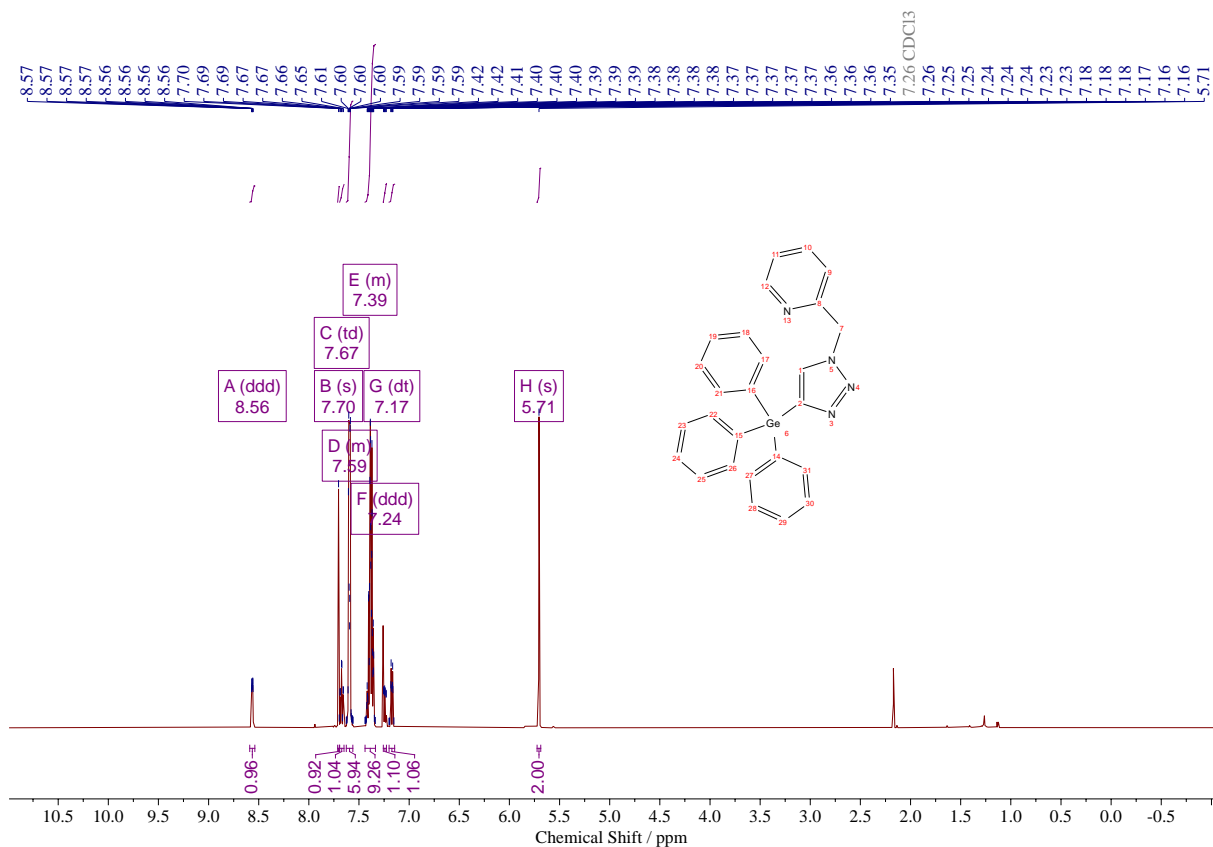

<sup>13</sup>C DEPTQ

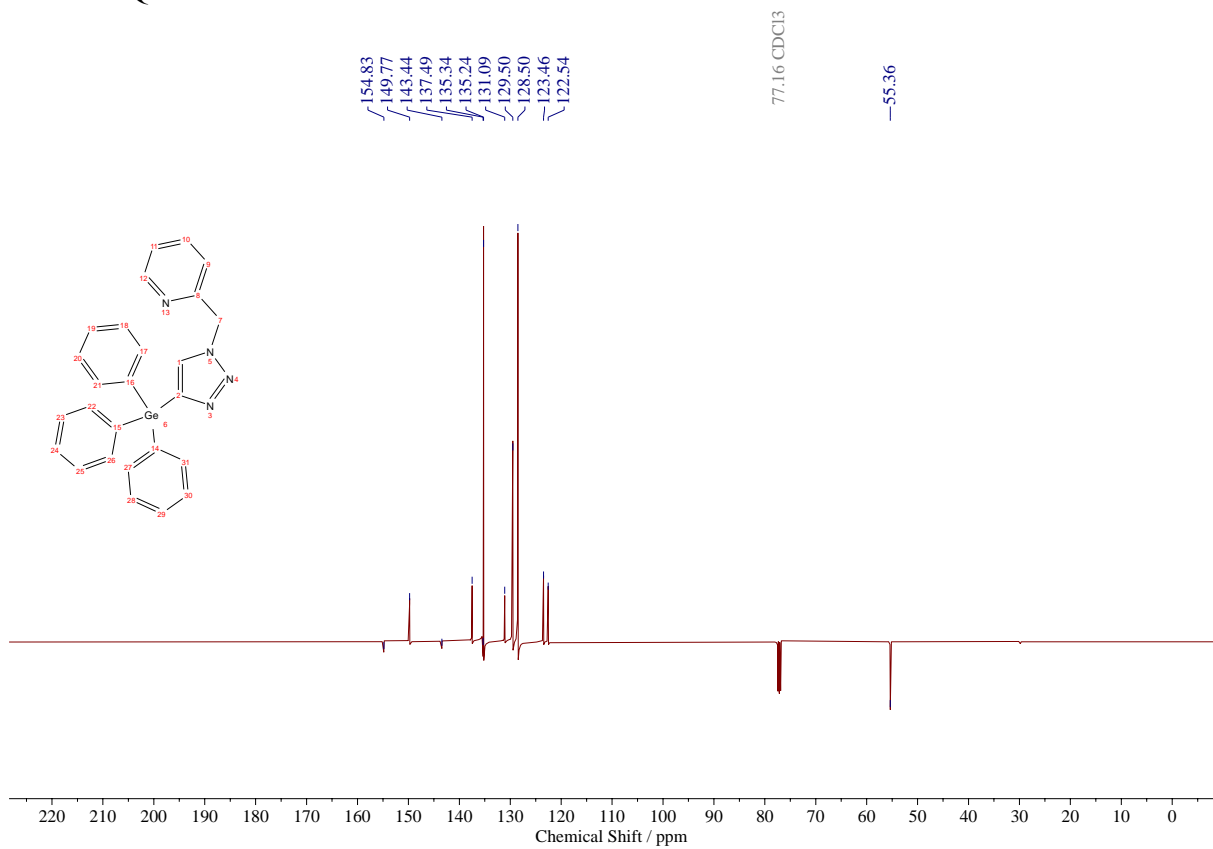

# 2 - <sup>1</sup>H

2401301746-5-4-jhm25.10.fid  
JHM-JMGe21-fa || 1H Observe

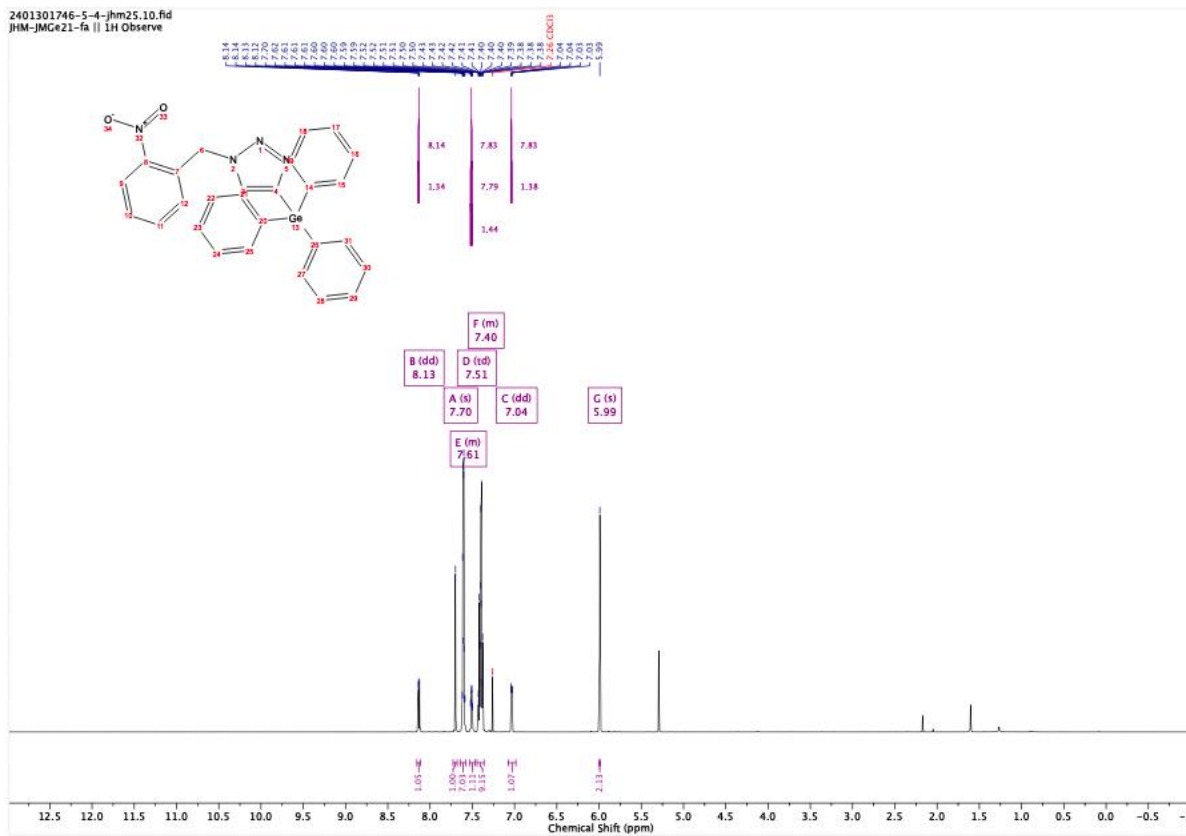

# <sup>13</sup>C DEPTQ

2401301746-5-4-jhm25.11.fid  
JHM-JMGe21-fa || 13C Observe with multiplicity editing - DEPTQ

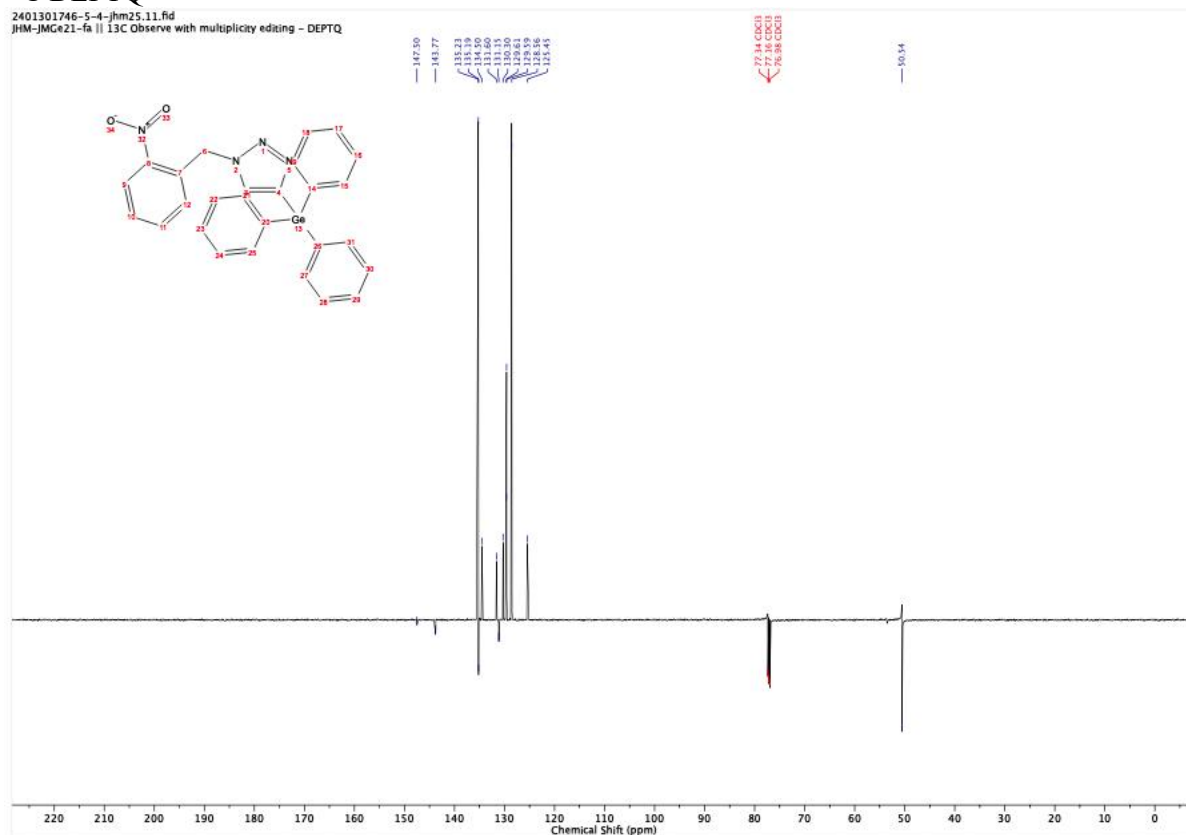

### 3-<sup>1</sup>H

2401311723-0-6-jhm25.10.fid  
JHM-JMGe22-fa || 1H Observe

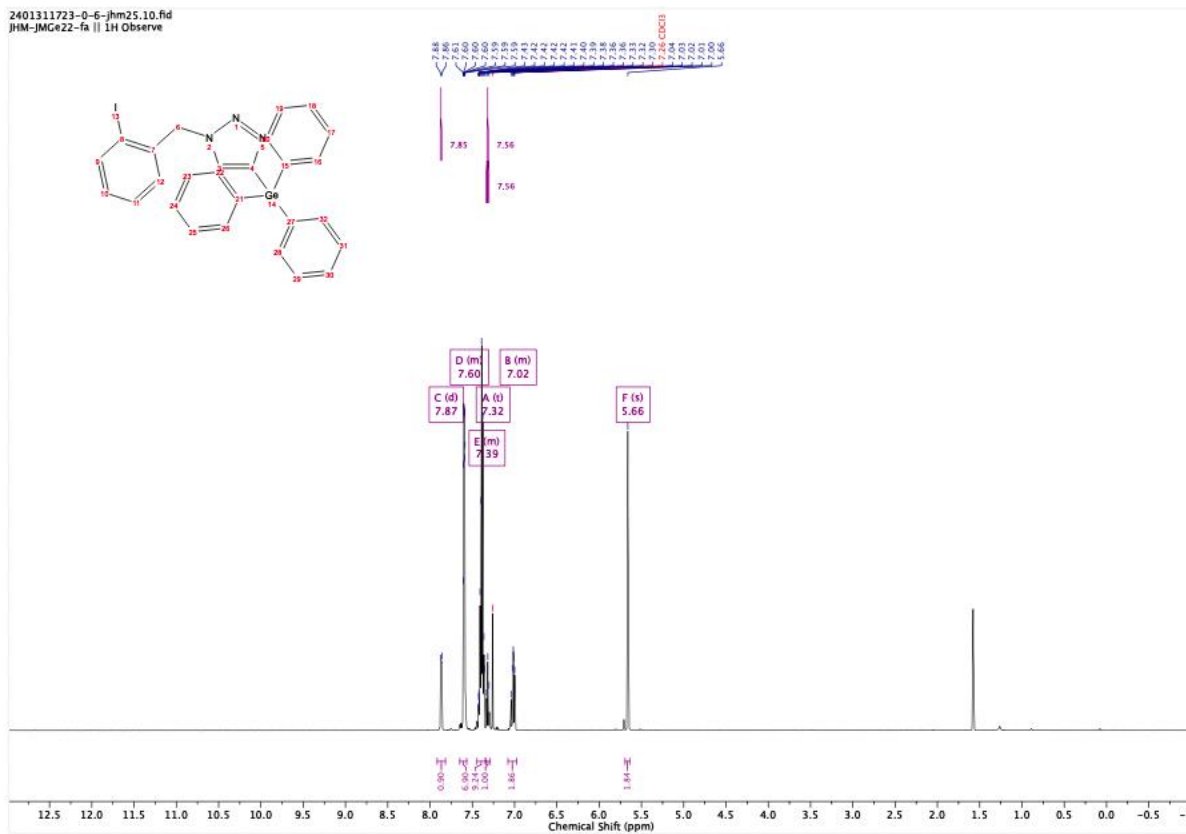

### <sup>13</sup>C DEPTQ

2401311723-0-6-jhm25.11.fid  
JHM-JMGe22-fa || <sup>13</sup>C Observe with multiplicity editing - DEPTQ

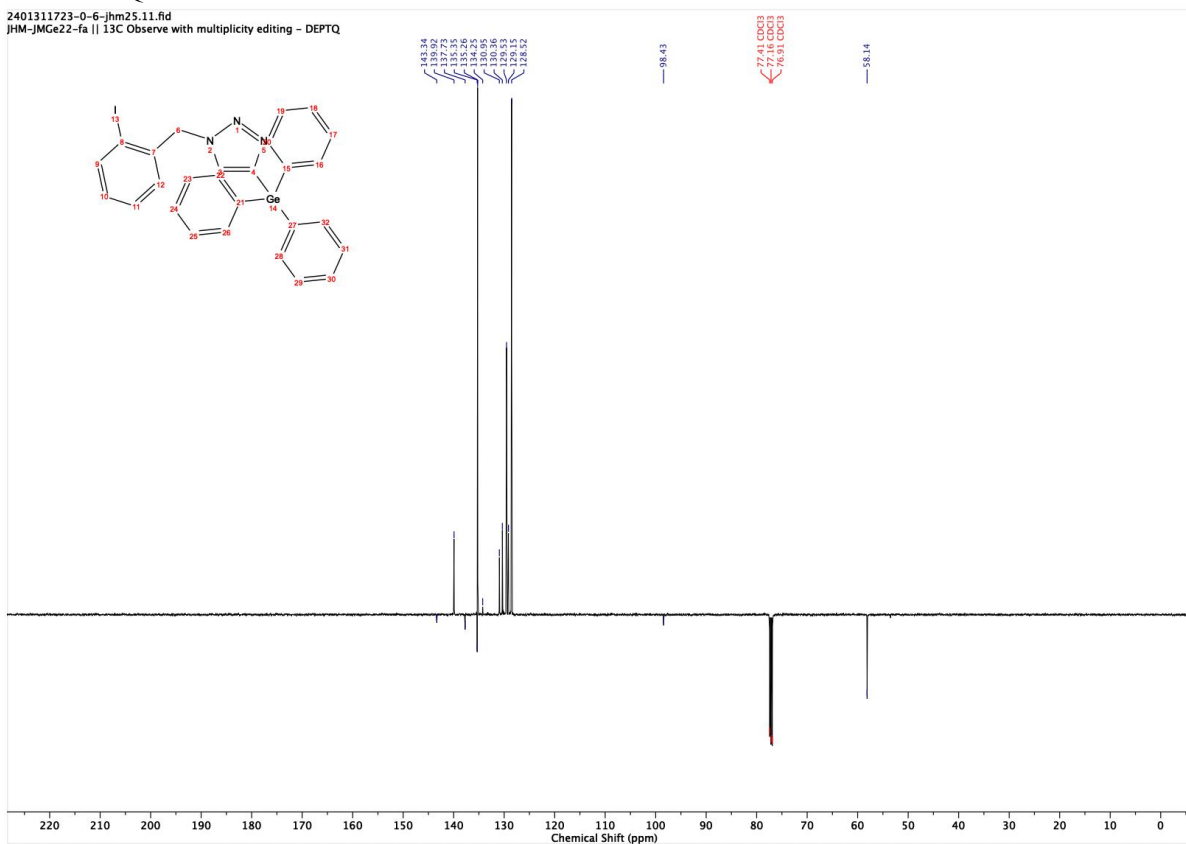

4 -  $^1\text{H}\{^{19}\text{F}\}$

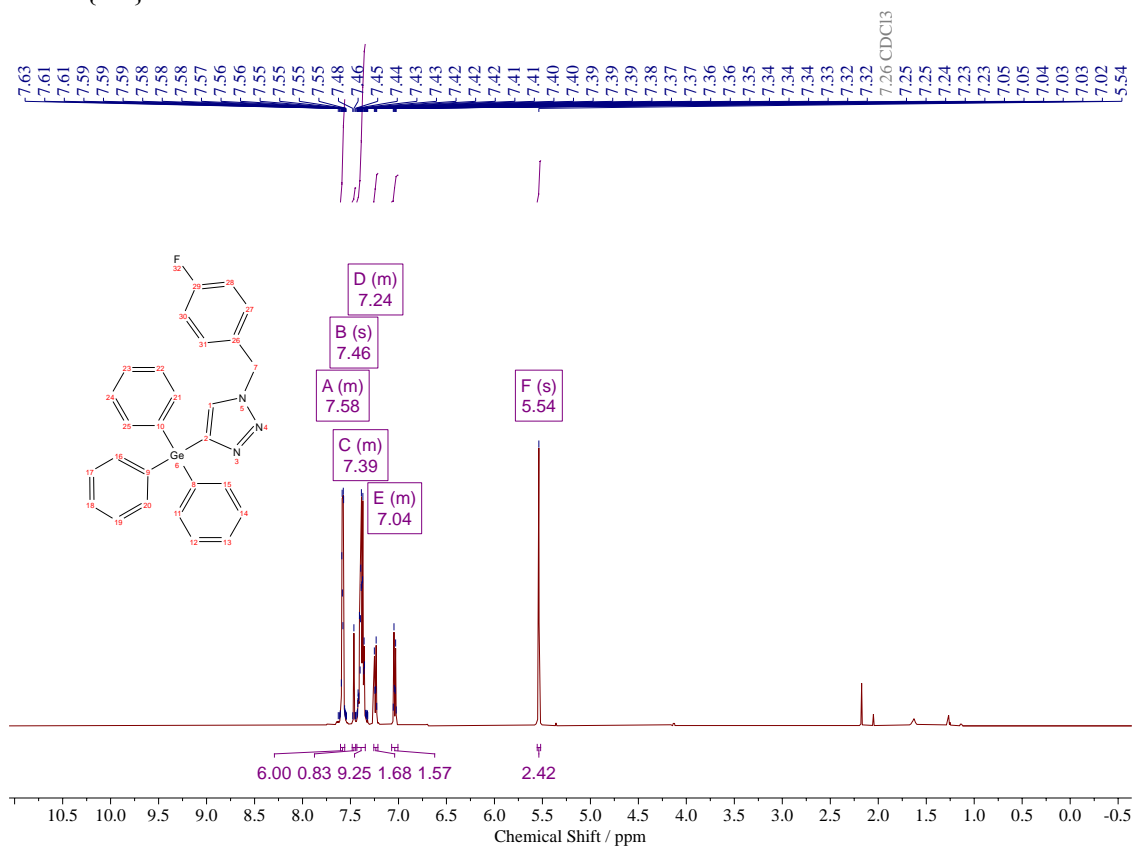

$^{13}\text{C}$  DEPTQ

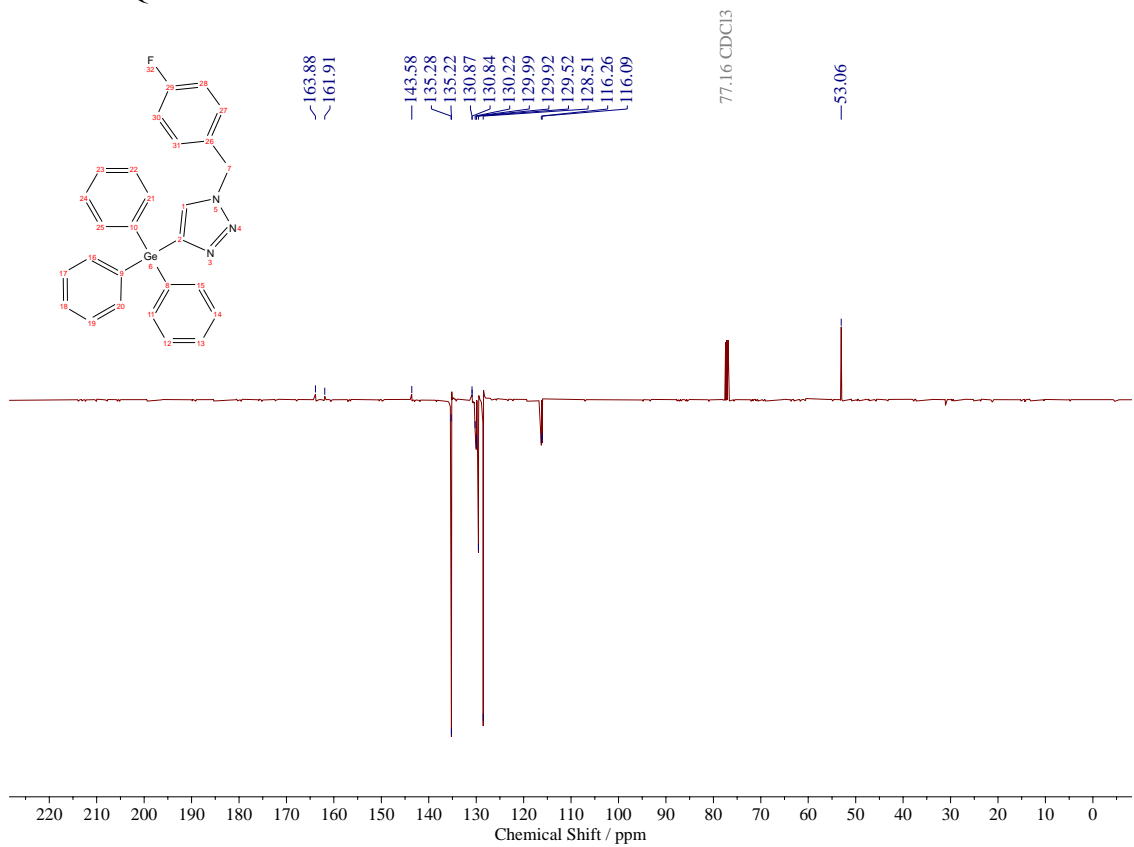



$^{19}\text{F}\{^1\text{H}\}$

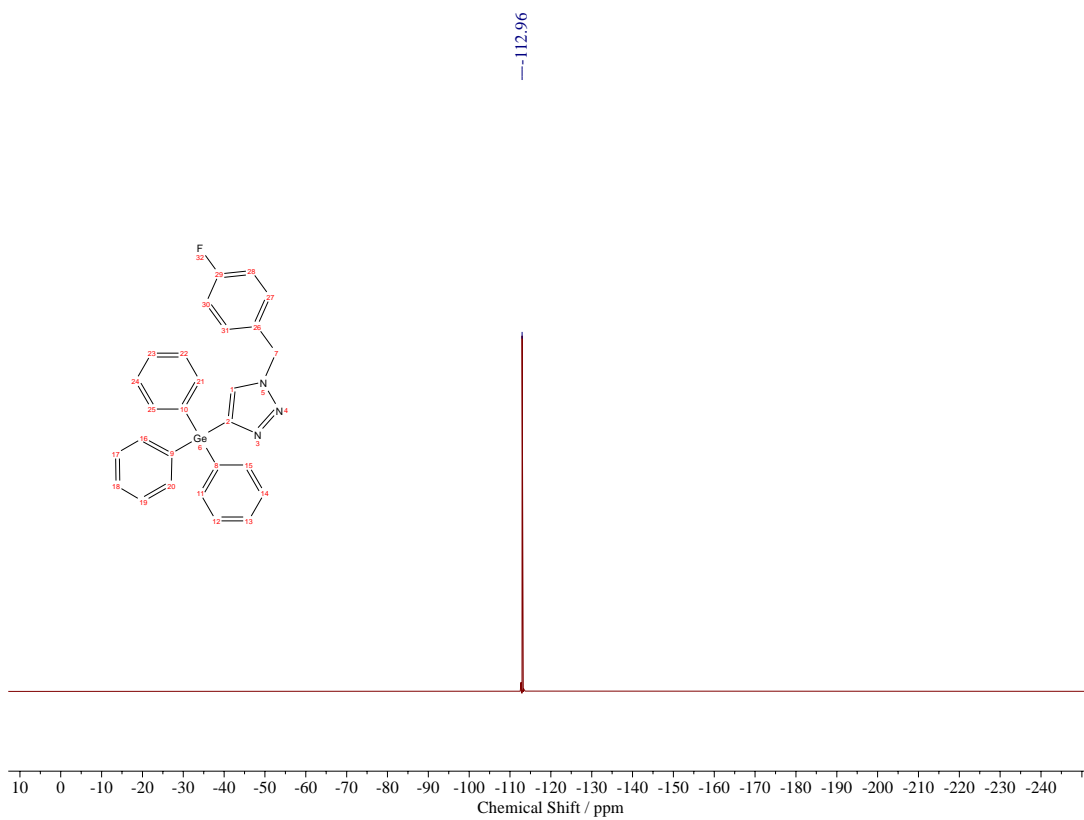

5-<sup>1</sup>H

2402021741-0-12-jhm25.10.fid  
jhm-jmGe25-FA || 1H Observe

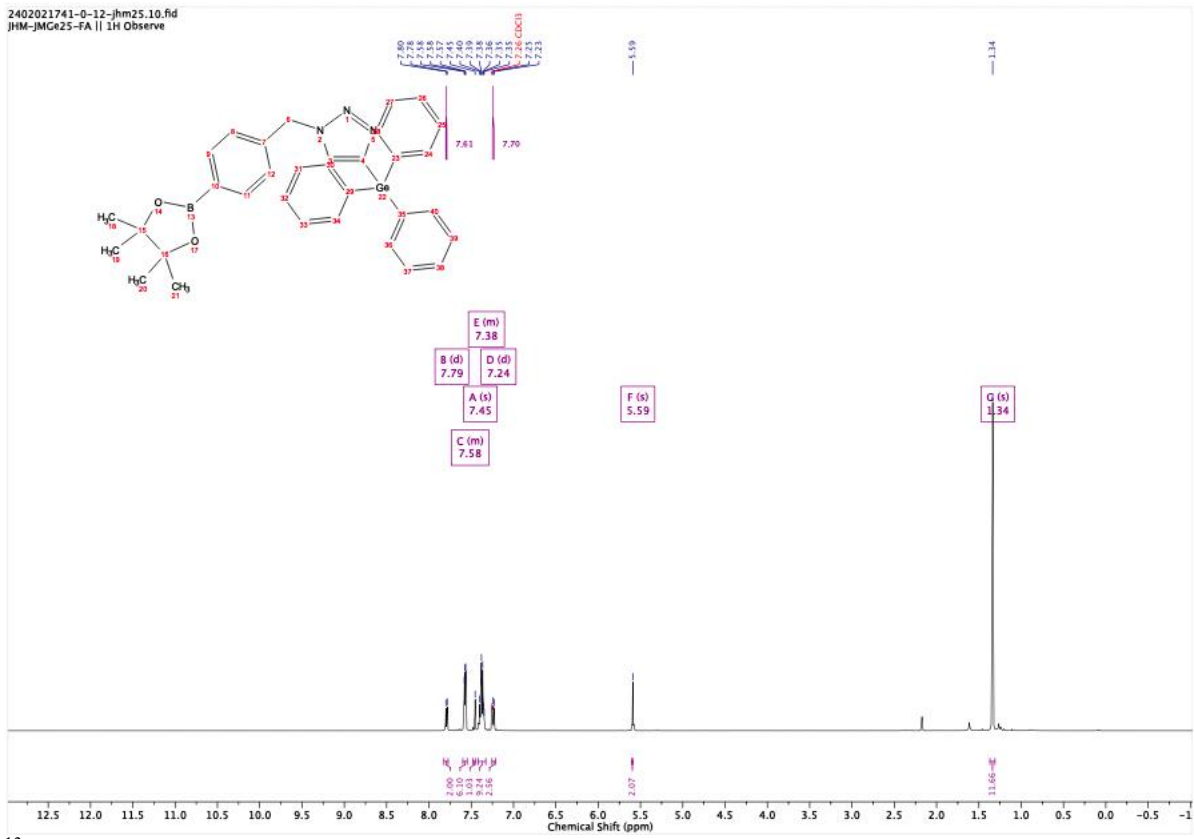

<sup>13</sup>C DEPTQ

2402021741-0-12-jhm25.11.fid  
jhm-jmGe25-FA || <sup>13</sup>C Observe with multiplicity editing - DEPTQ

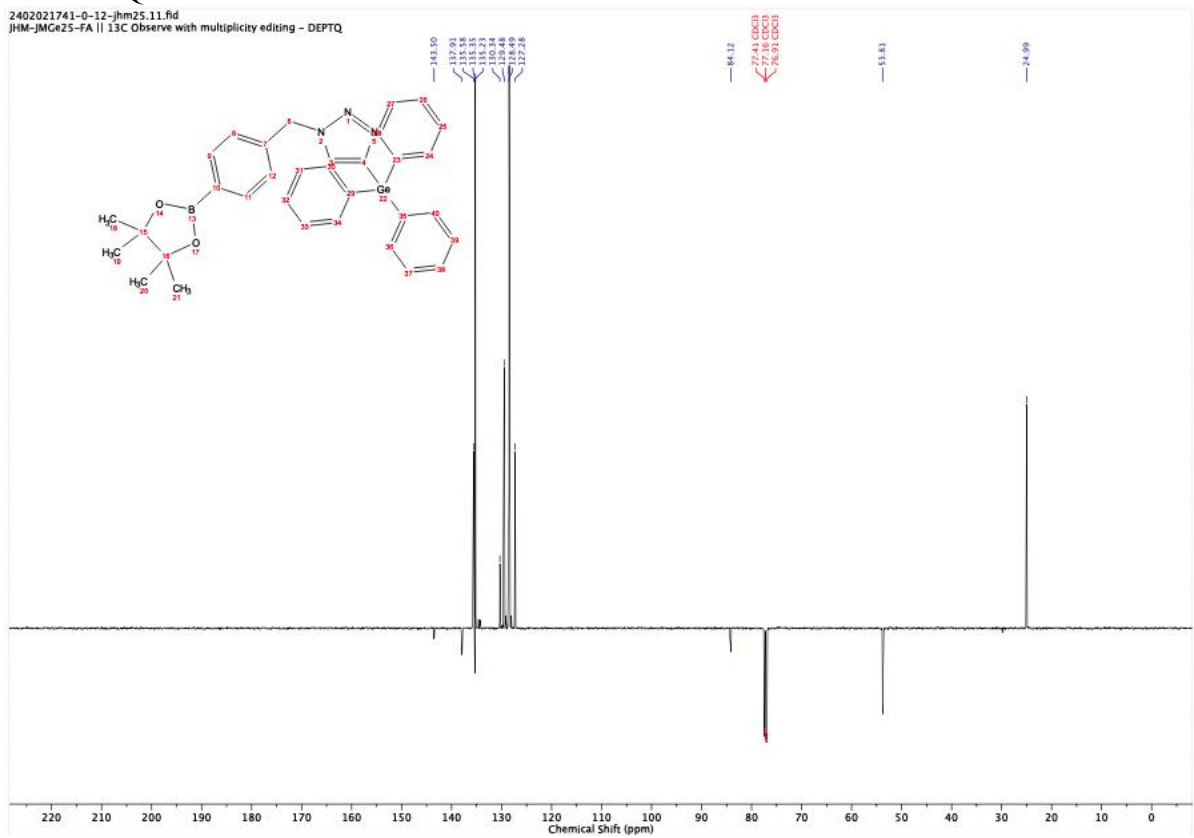

$^{11}\text{B}$

2402051114-3-19-jhm25.10.fid  
JHM-JMG625-fa || 11B Observe - SW=250ppm (Et2O,BF3/CDCl3 - 0ppm)

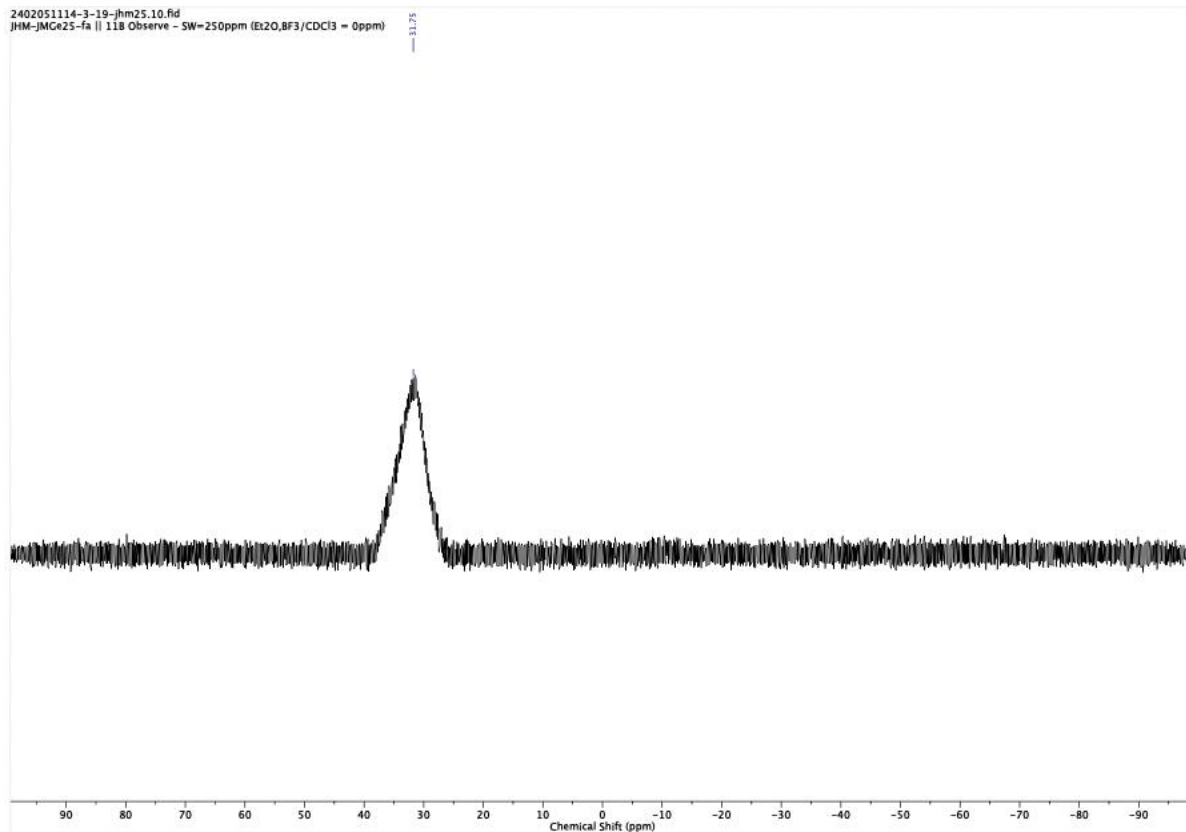

6 -  $^1\text{H}\{^{19}\text{F}\}$

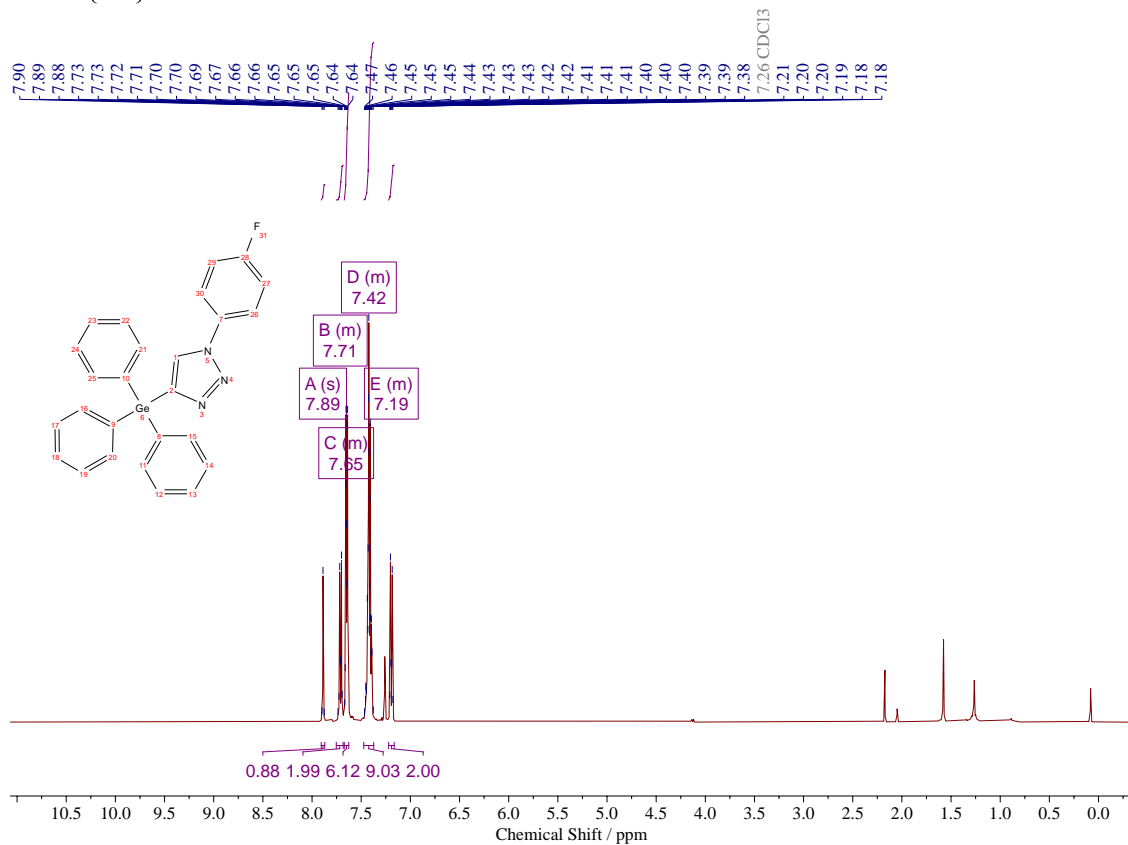

$^{13}\text{C}$  DEPTQ

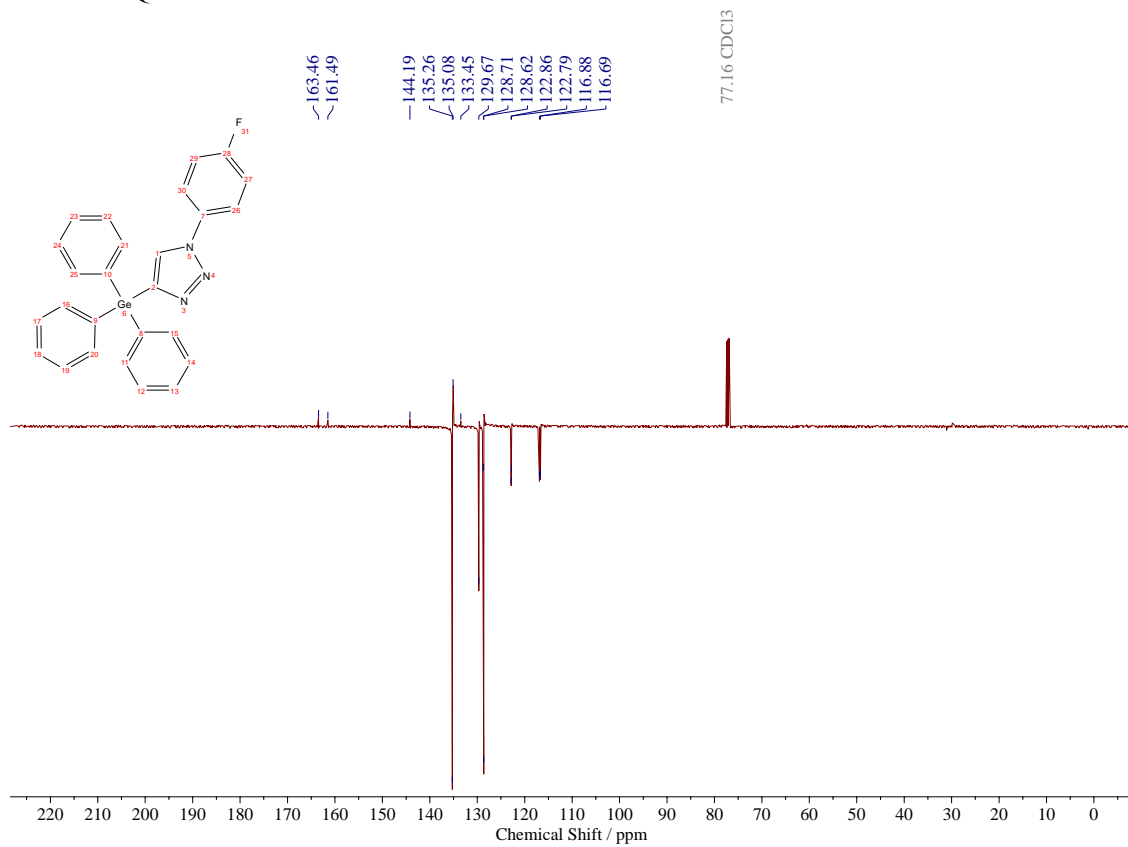

$^{19}\text{F}\{^1\text{H}\}$

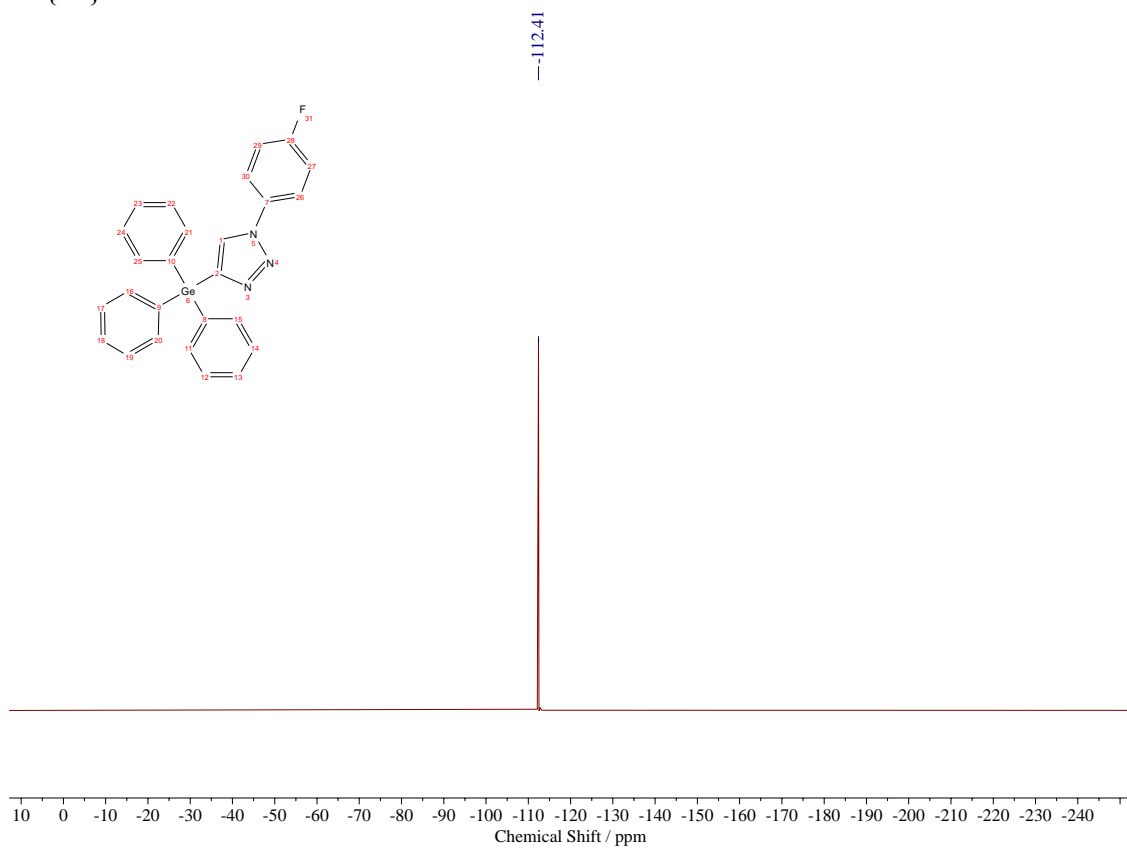

7-<sup>1</sup>H

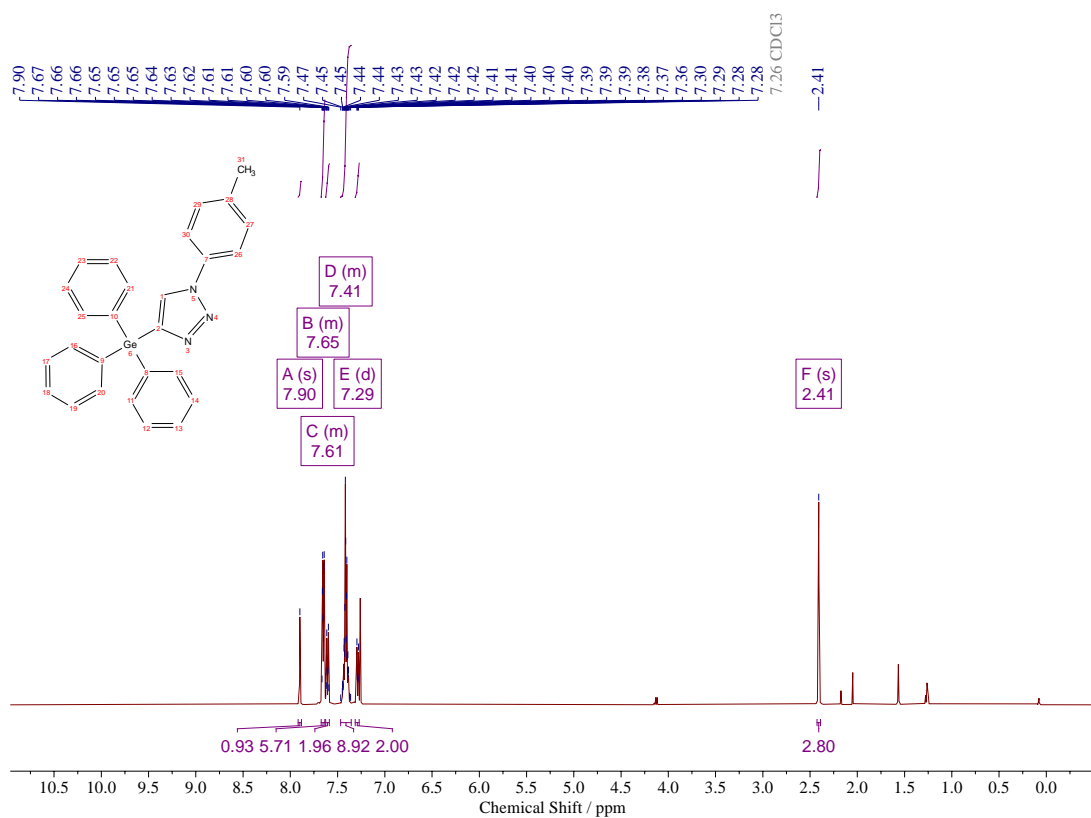

<sup>13</sup>C DEPTQ

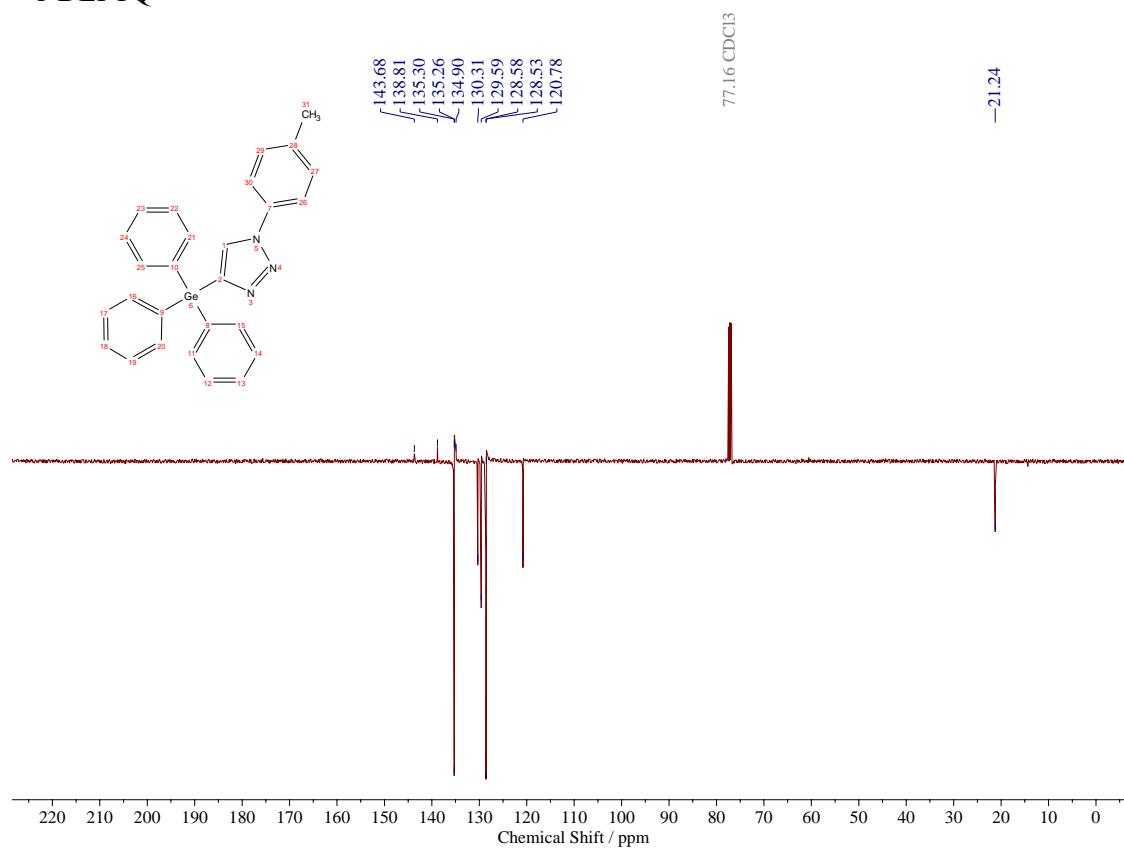



9-<sup>1</sup>H

2401301744-2-21-jhm25.10.fid  
JHM-JMGe11-fa-1h || 1H Observe

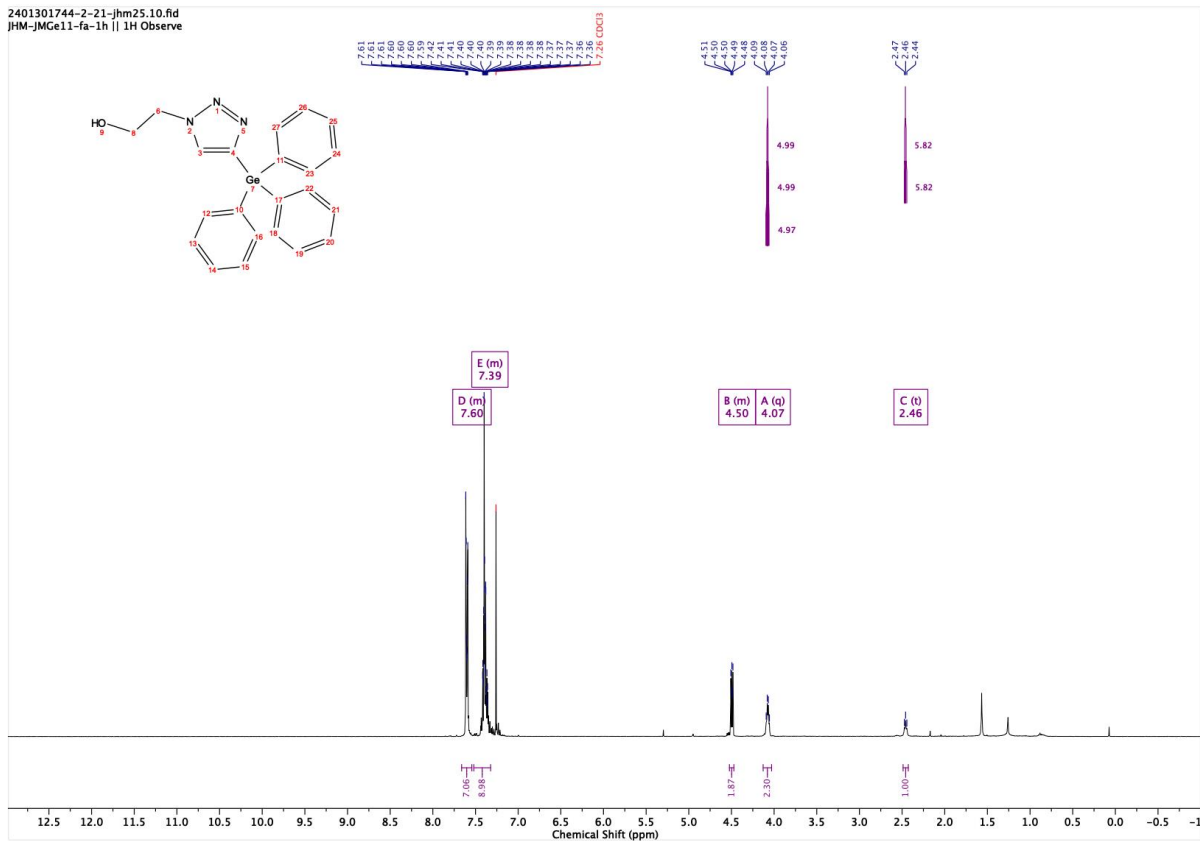

<sup>13</sup>C DEPTQ

2401261724-5-4-jhm25.11.fid  
JHM-JMGe11-FA || <sup>13</sup>C Observe with multiplicity editing - DEPTQ

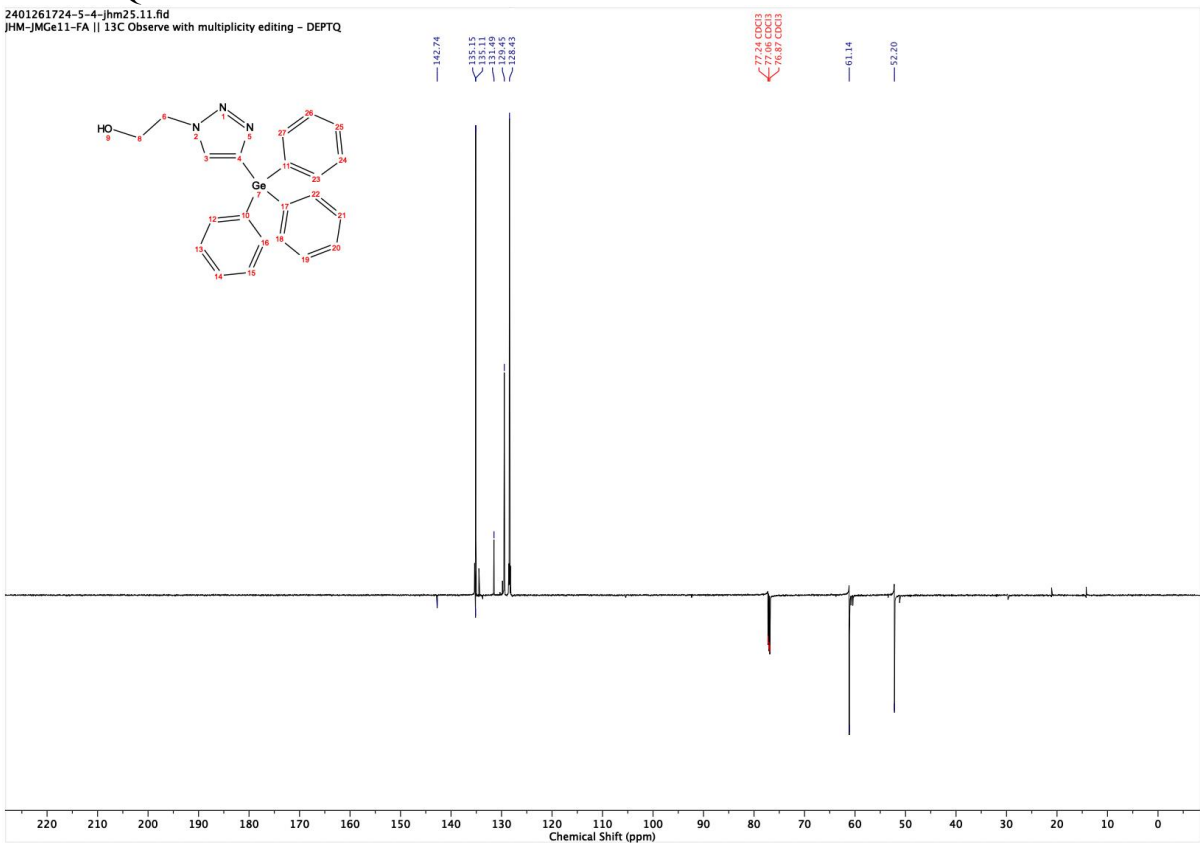



10 – <sup>1</sup>H

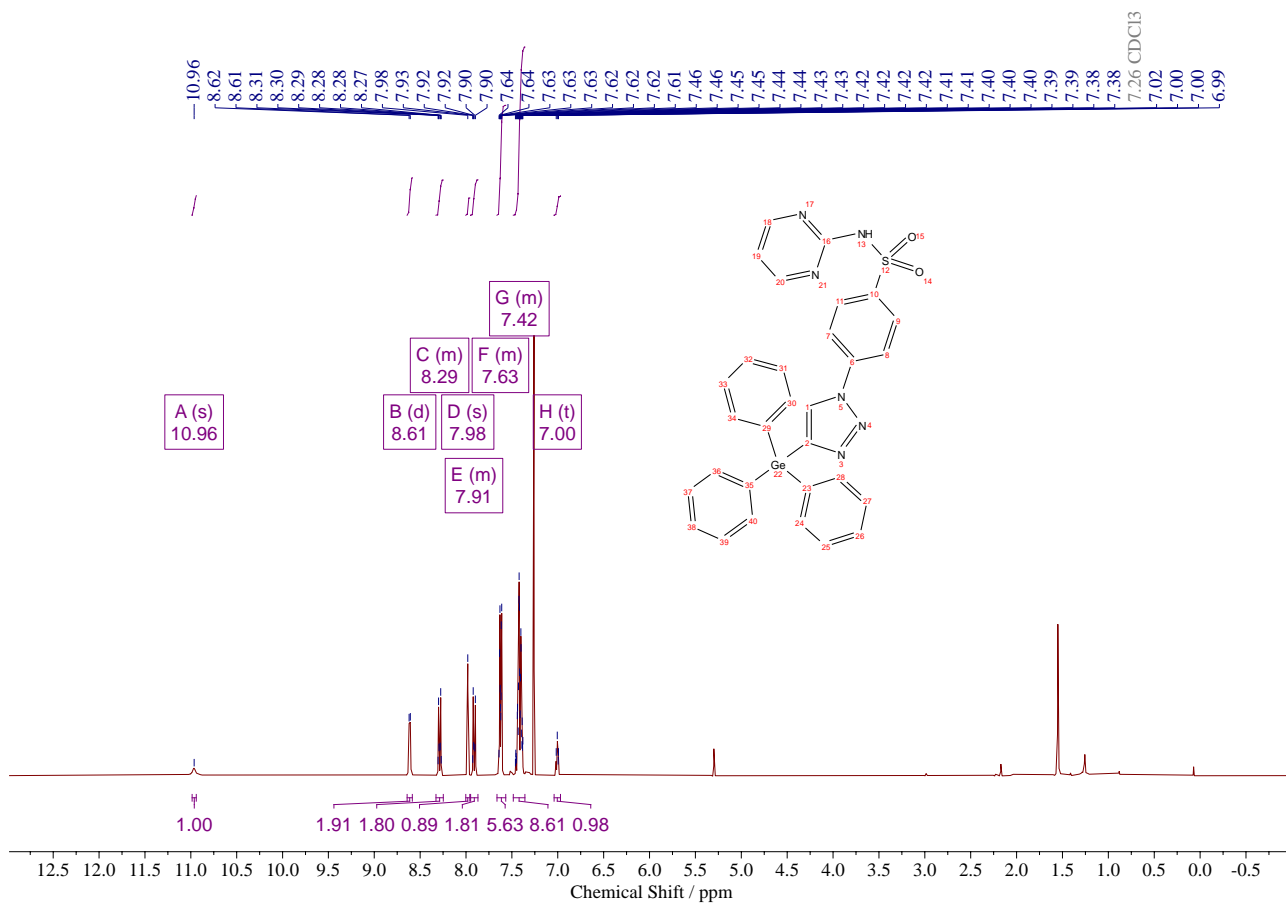

<sup>13</sup>C DEPTQ

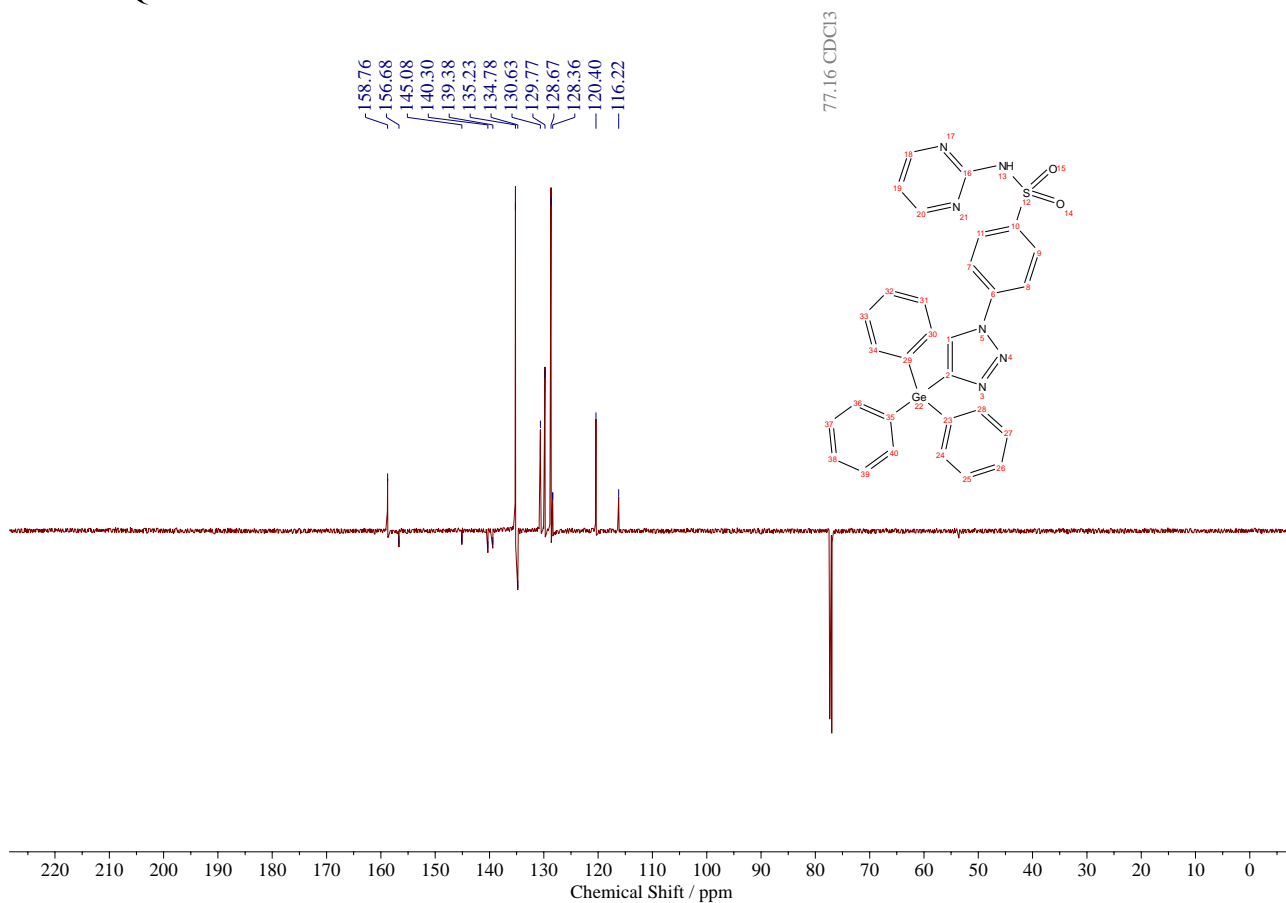

# $^1\text{H}$

2401261648-0-25-jhm25.10.fid  
JHM-JMGe05-FA ||  $^1\text{H}$  Observe

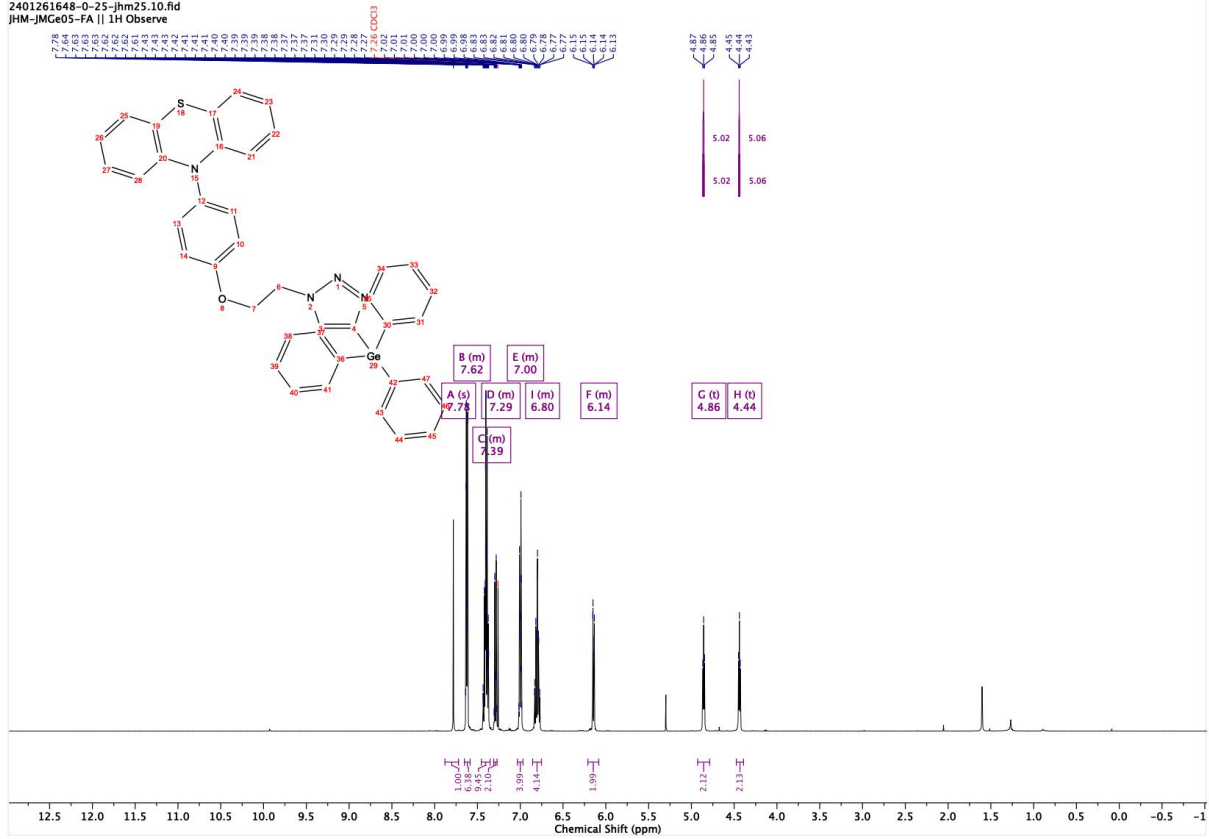

# $^{13}\text{C}$ DEPTQ

2401261648-0-25-jhm25.11.fid  
JHM-JMGe05-FA ||  $^{13}\text{C}$  Observe with multiplicity editing - DEPTQ

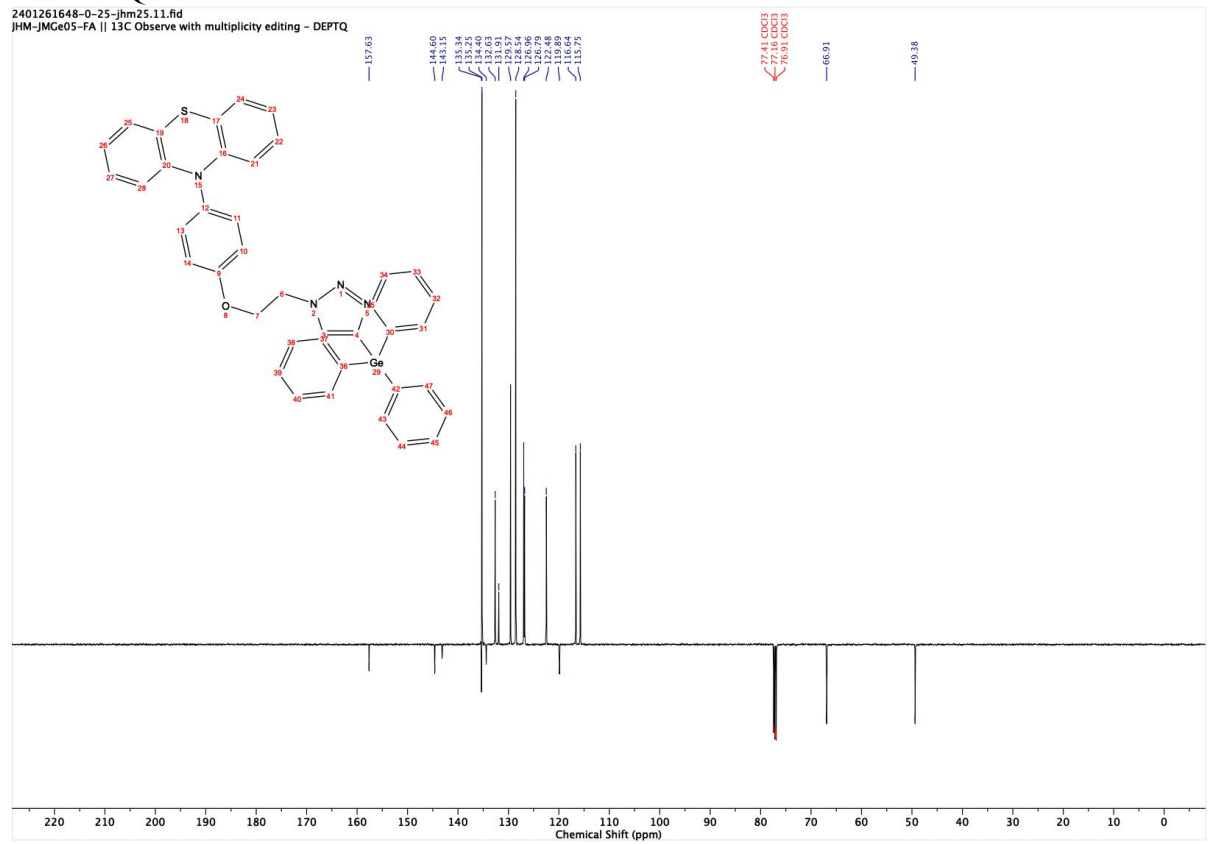

# 12 - <sup>1</sup>H

2401261648-0-27-jhm25.10.fid  
jhm-jmce07-fa || 1H Observe

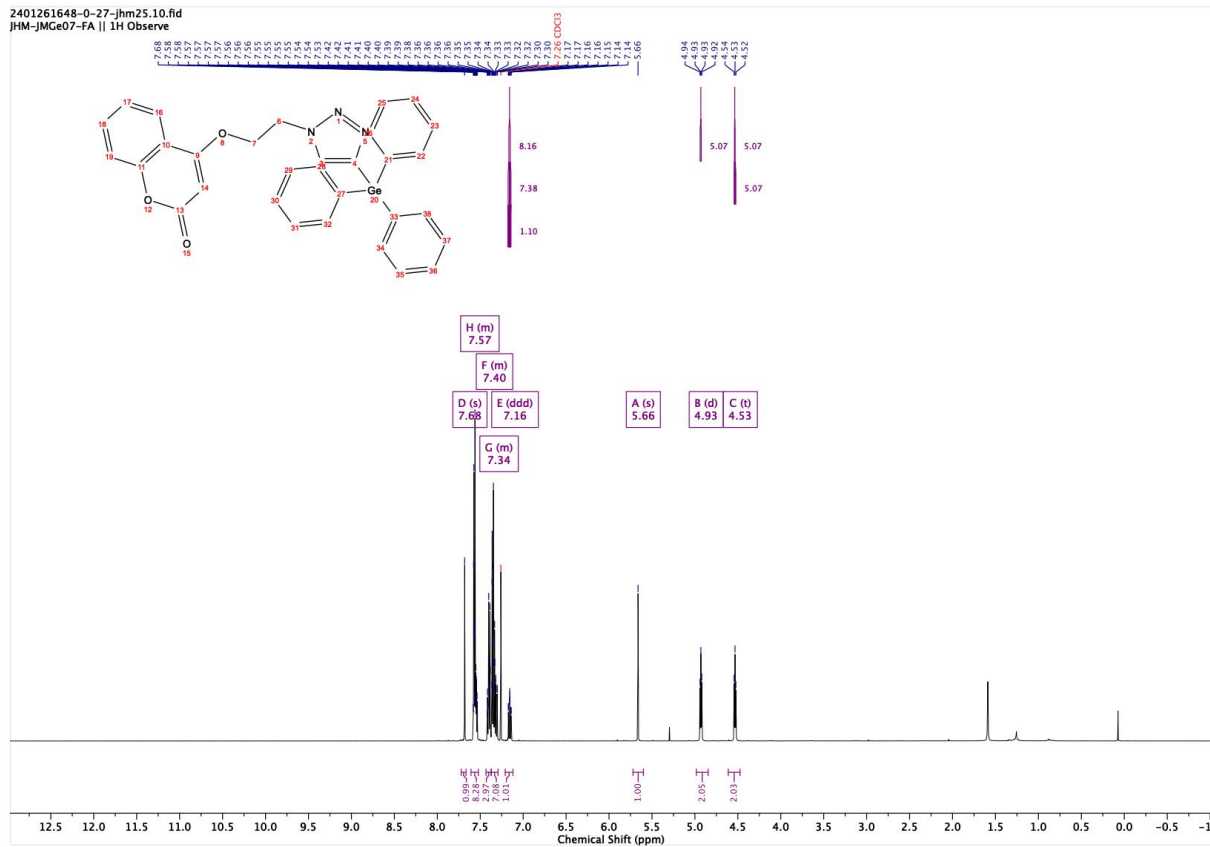

# <sup>13</sup>C DEPTQ

2401261648-0-27-jhm25.11.fid  
jhm-jmce07-fa || <sup>13</sup>C Observe with multiplicity editing - DEPTQ

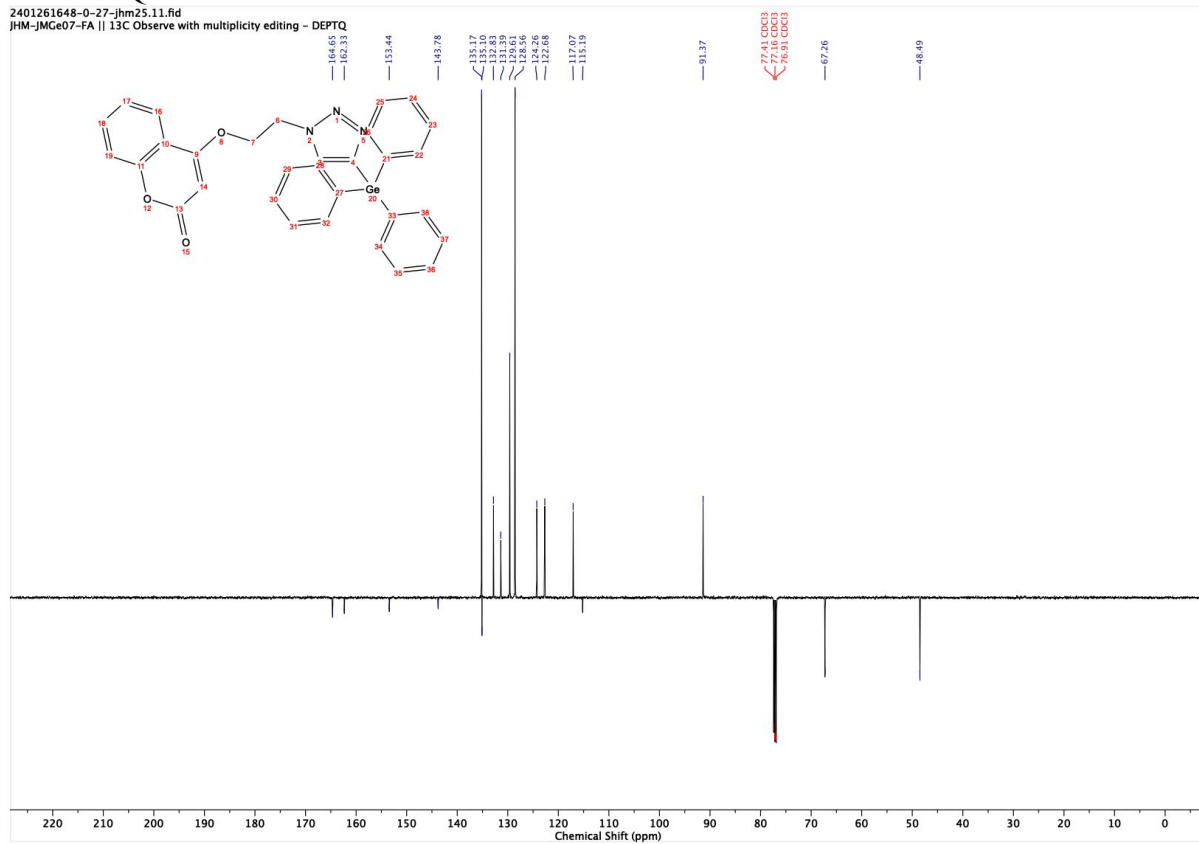

# 13 - 1H

2401261648-0-26-jhm25.10.fid

JHM-JMGe06-FA || 1H Observe

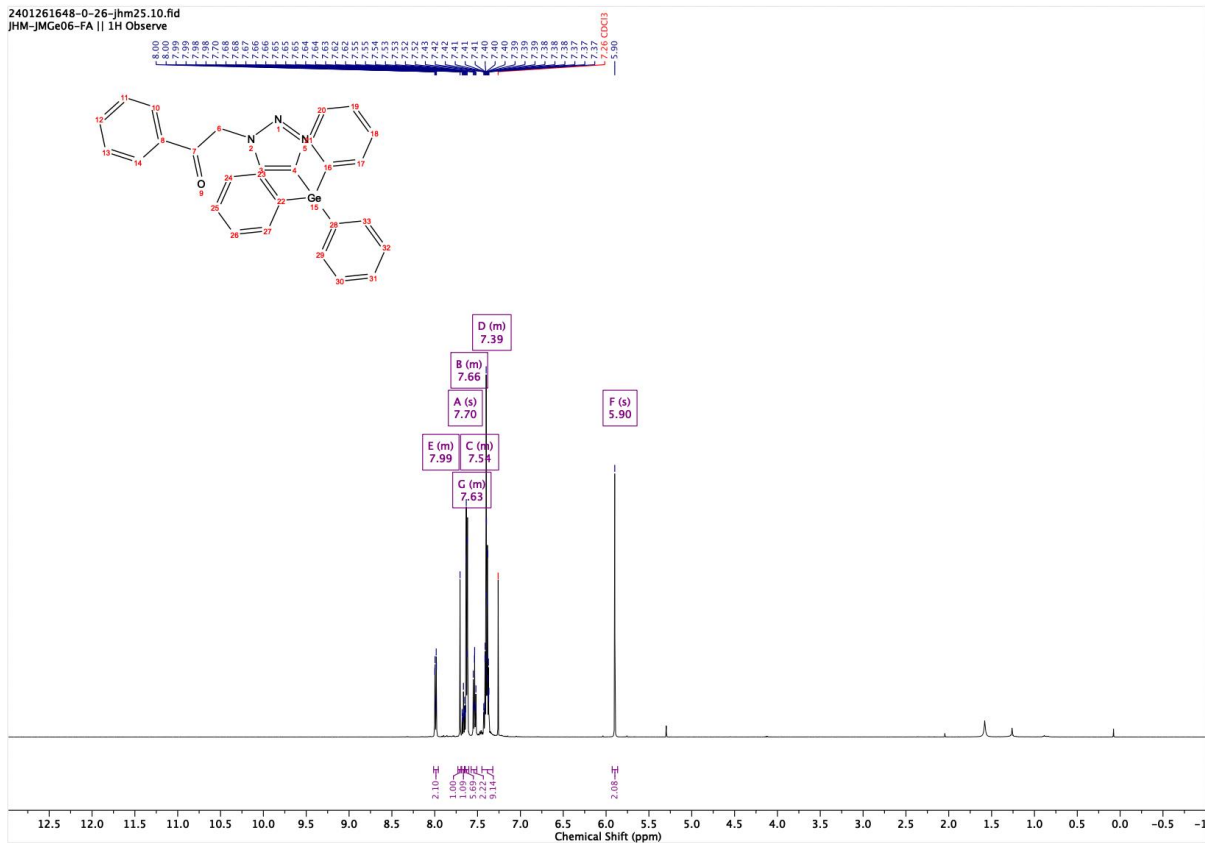

# 13C DEPTQ

2401261648-0-26-jhm25.11.fid

JHM-JMGe06-FA || 13C Observe with multiplicity editing - DEPTQ

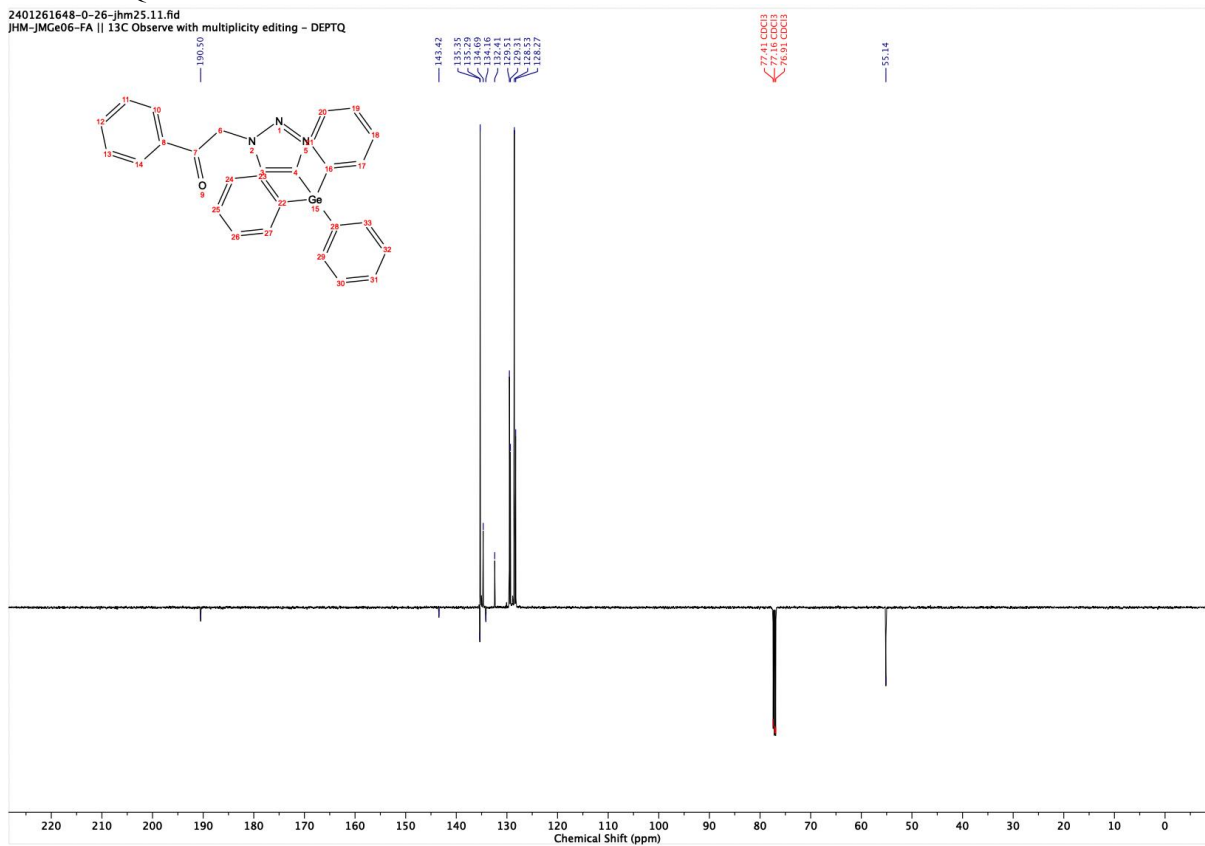

14 – <sup>1</sup>H

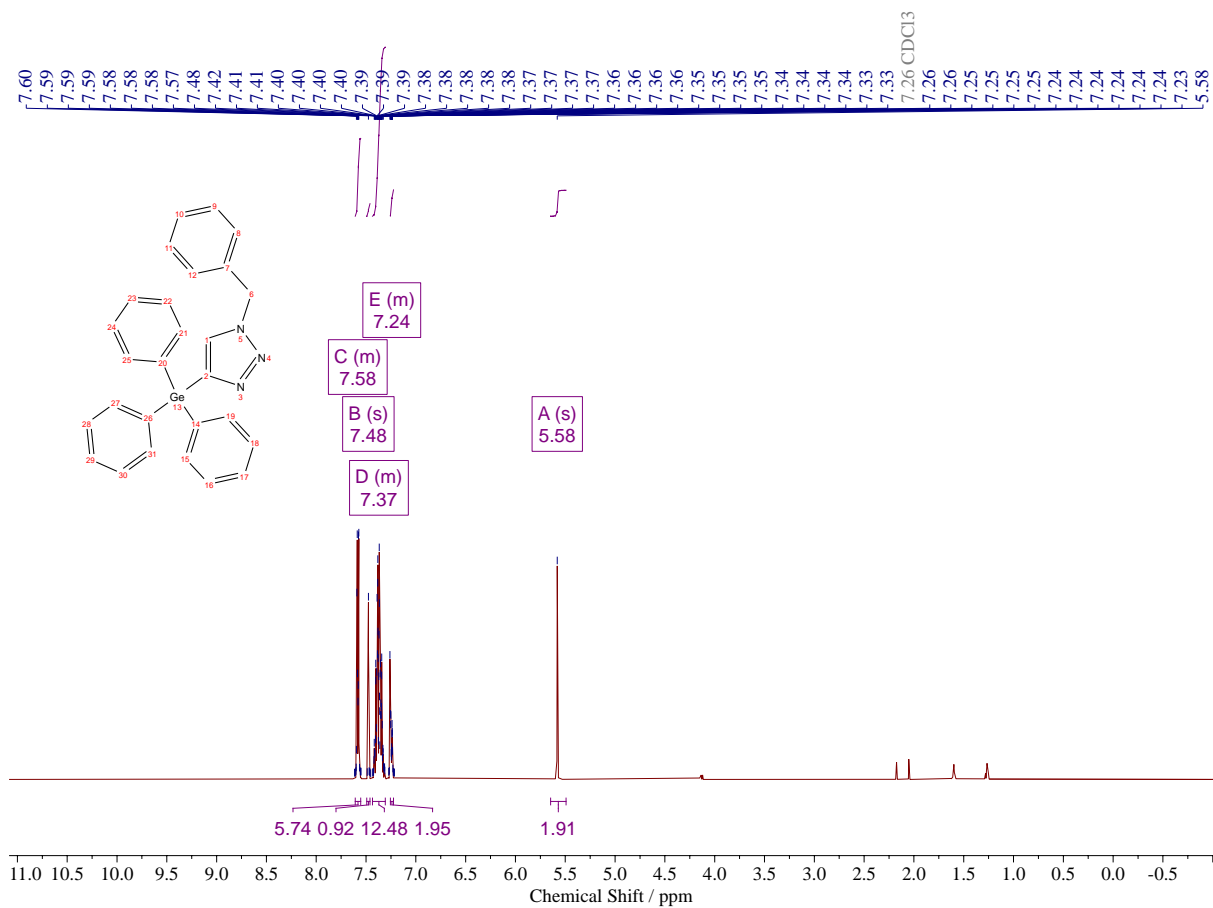

<sup>13</sup>C DEPTQ

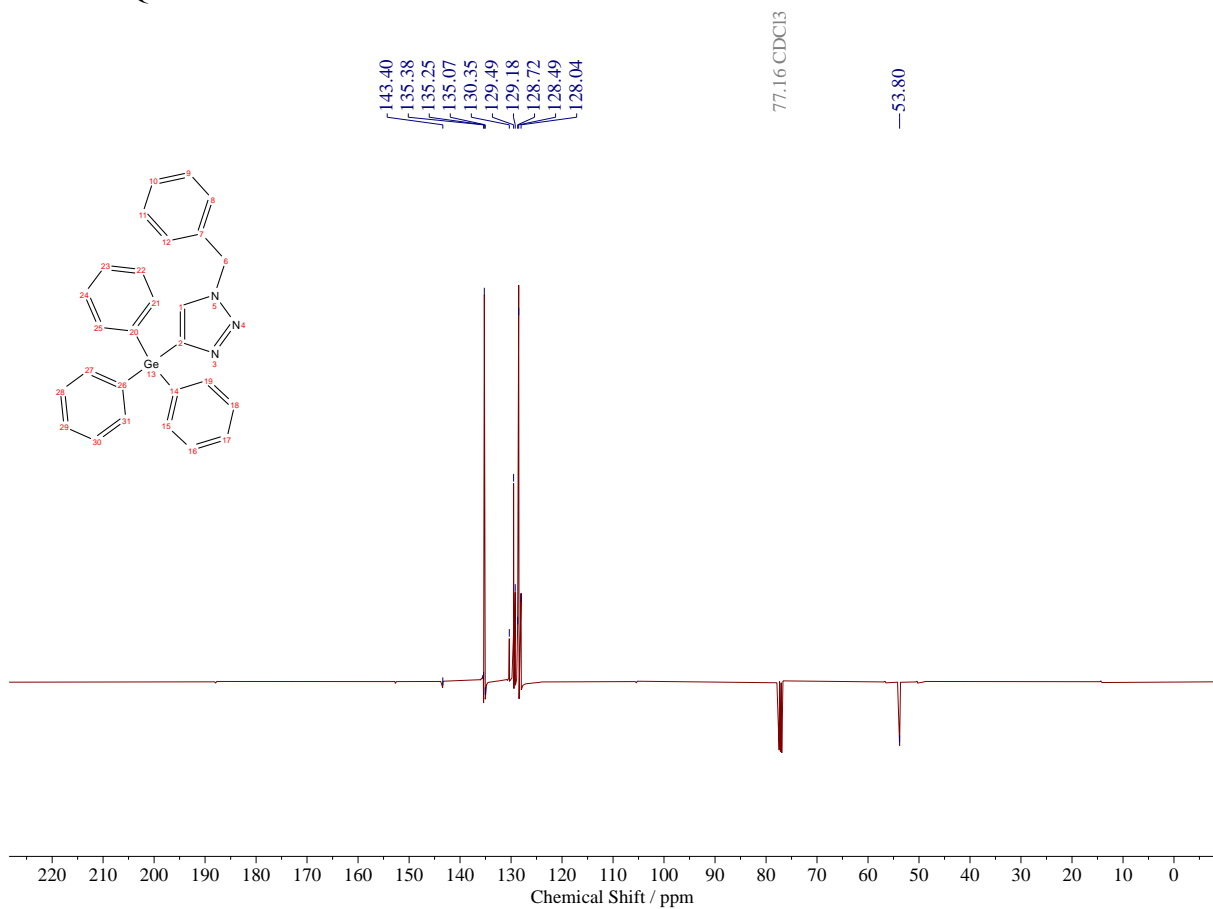



16 - <sup>1</sup>H

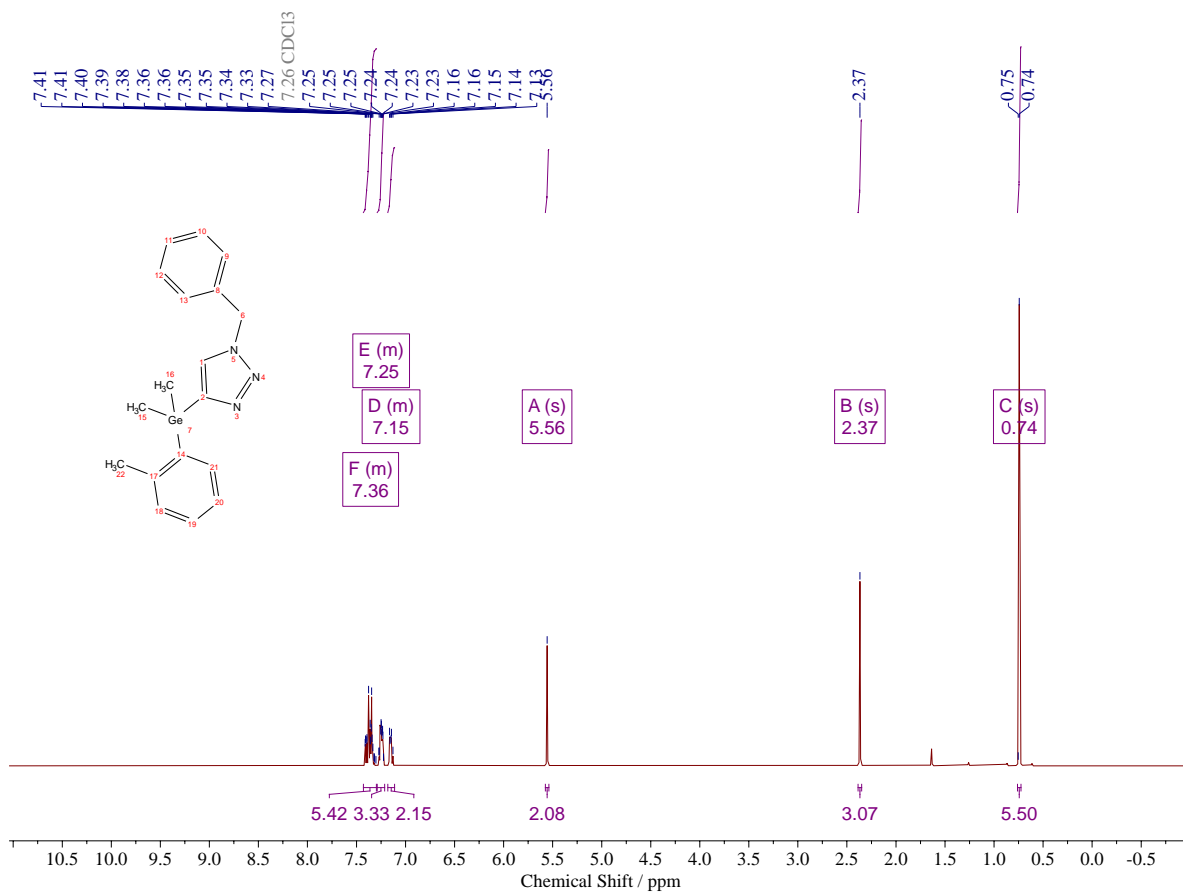

<sup>13</sup>C DEPTQ

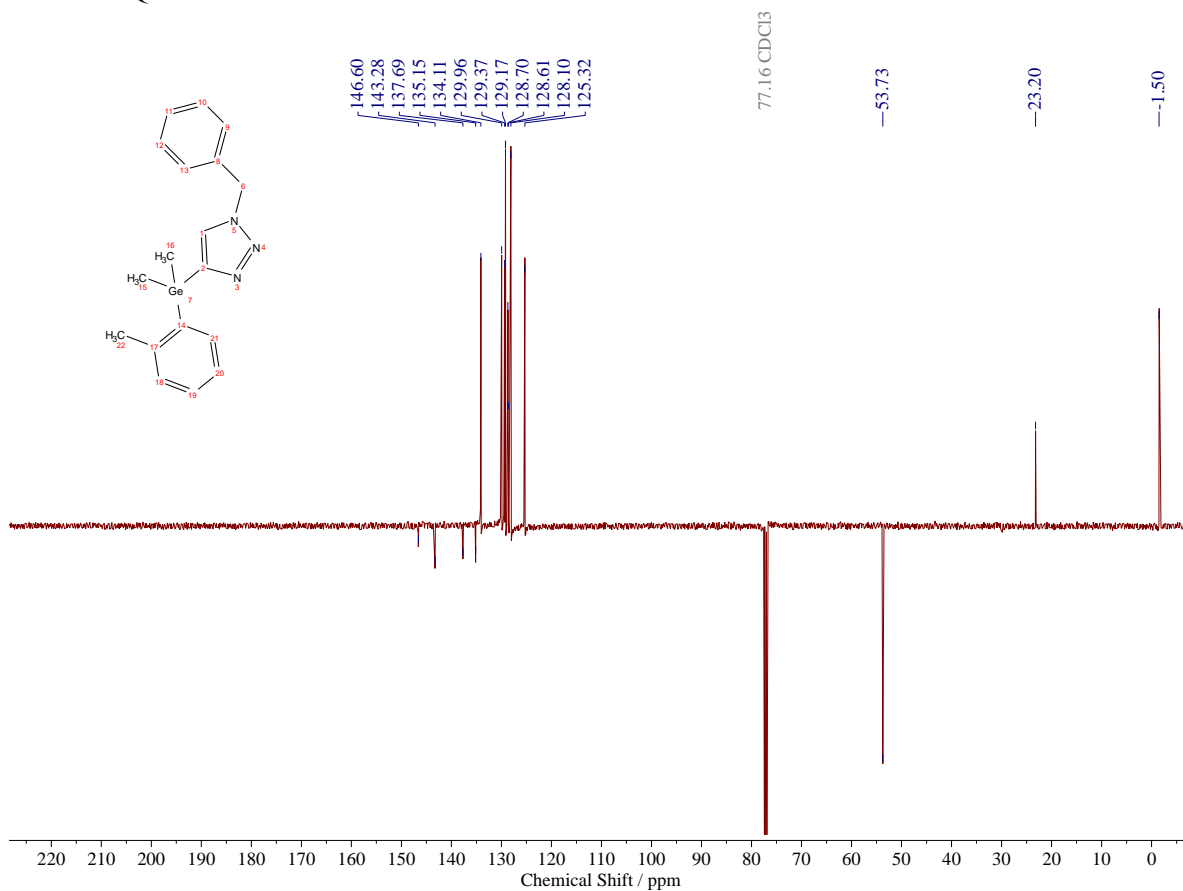

17 - <sup>1</sup>H

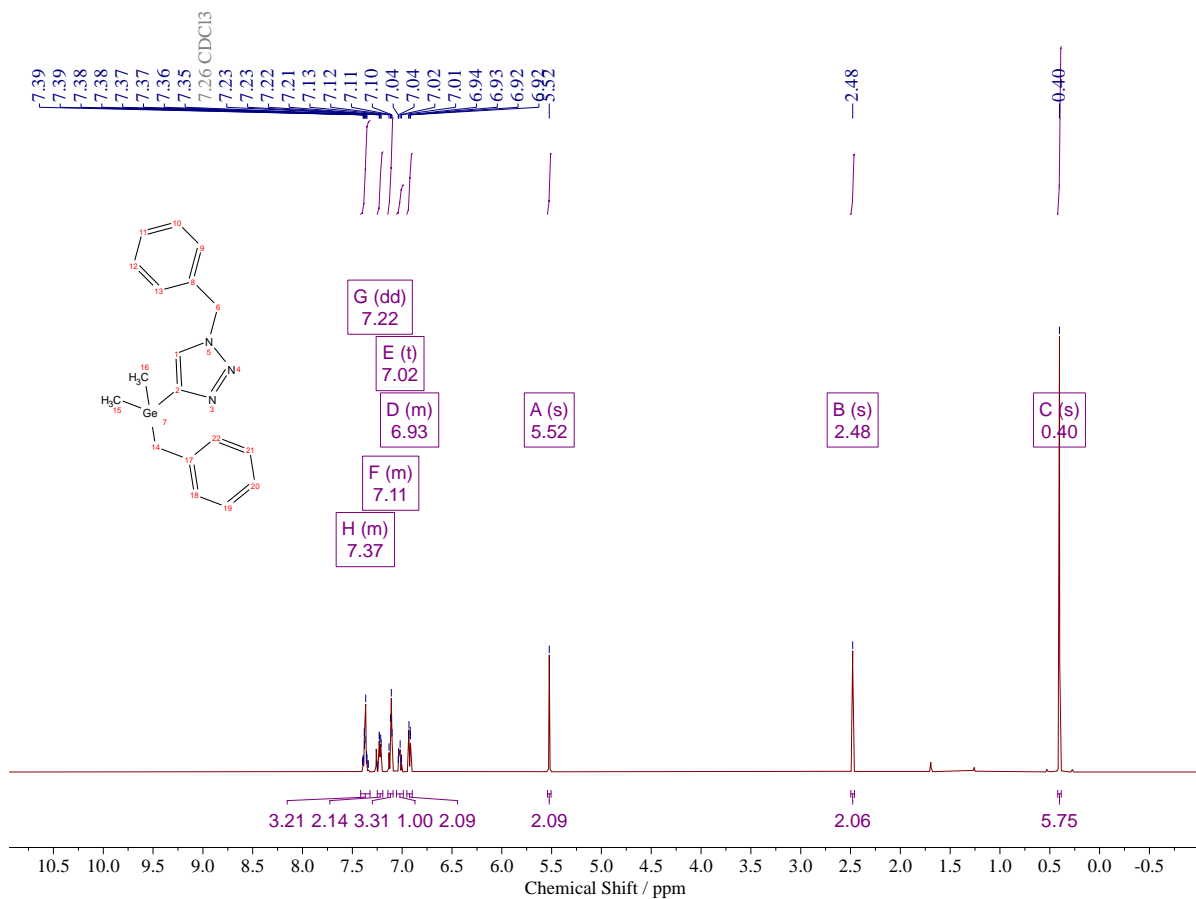

<sup>13</sup>C DEPTQ

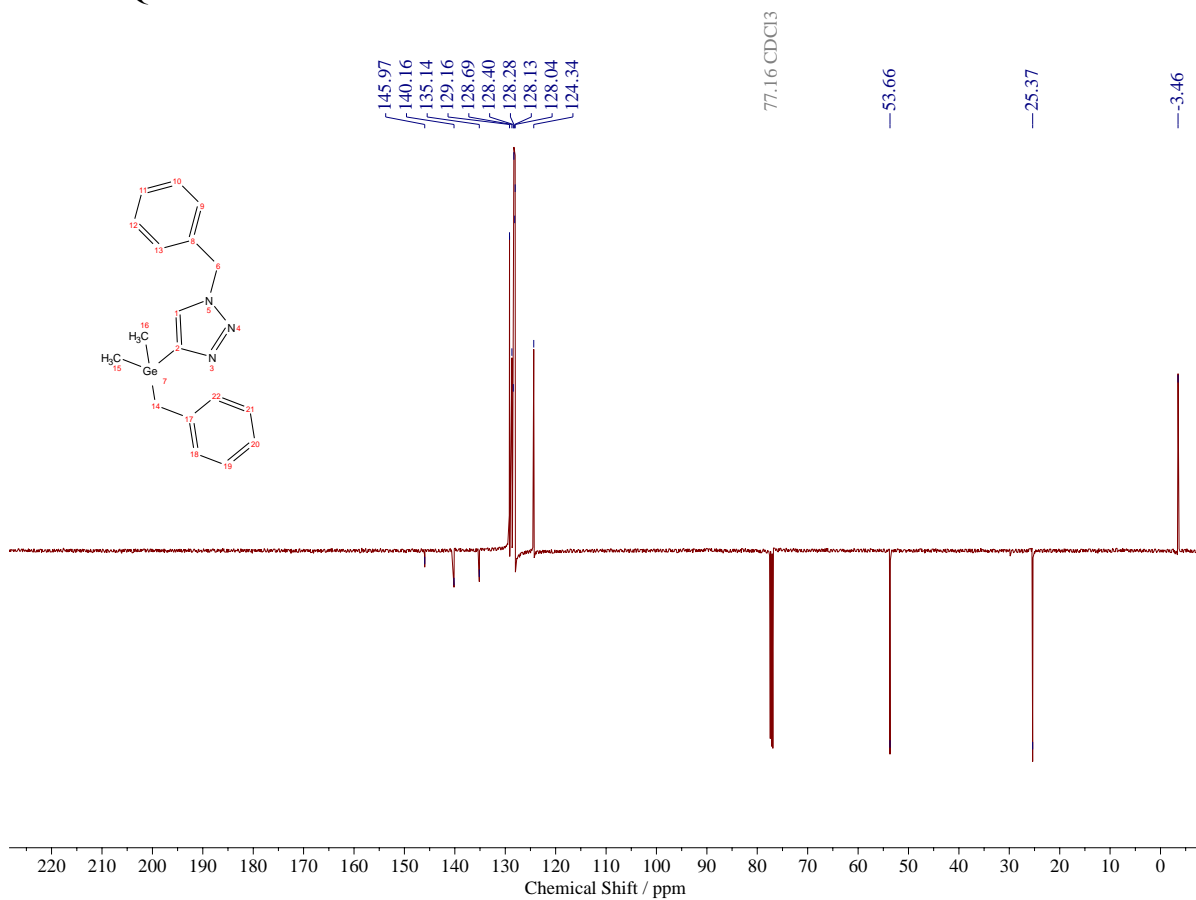



# 18 - <sup>1</sup>H

2402101455-0-33-jhm25.10.fid  
JHM-JMGe37-fa || 1H Observe

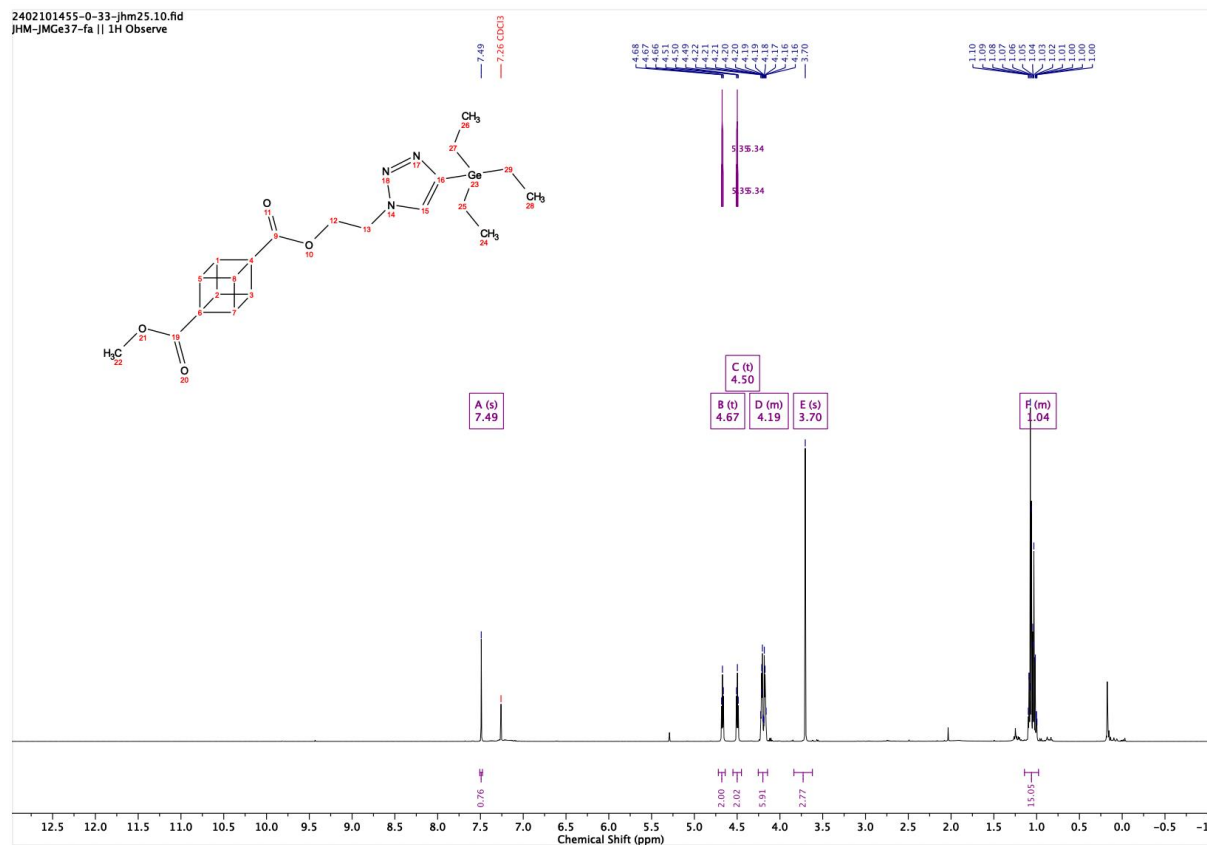

# <sup>13</sup>C DEPTQ

2402101455-0-33-jhm25.11.fid  
JHM-JMGe37-fa || <sup>13</sup>C Observe with multiplicity editing - DEPTQ

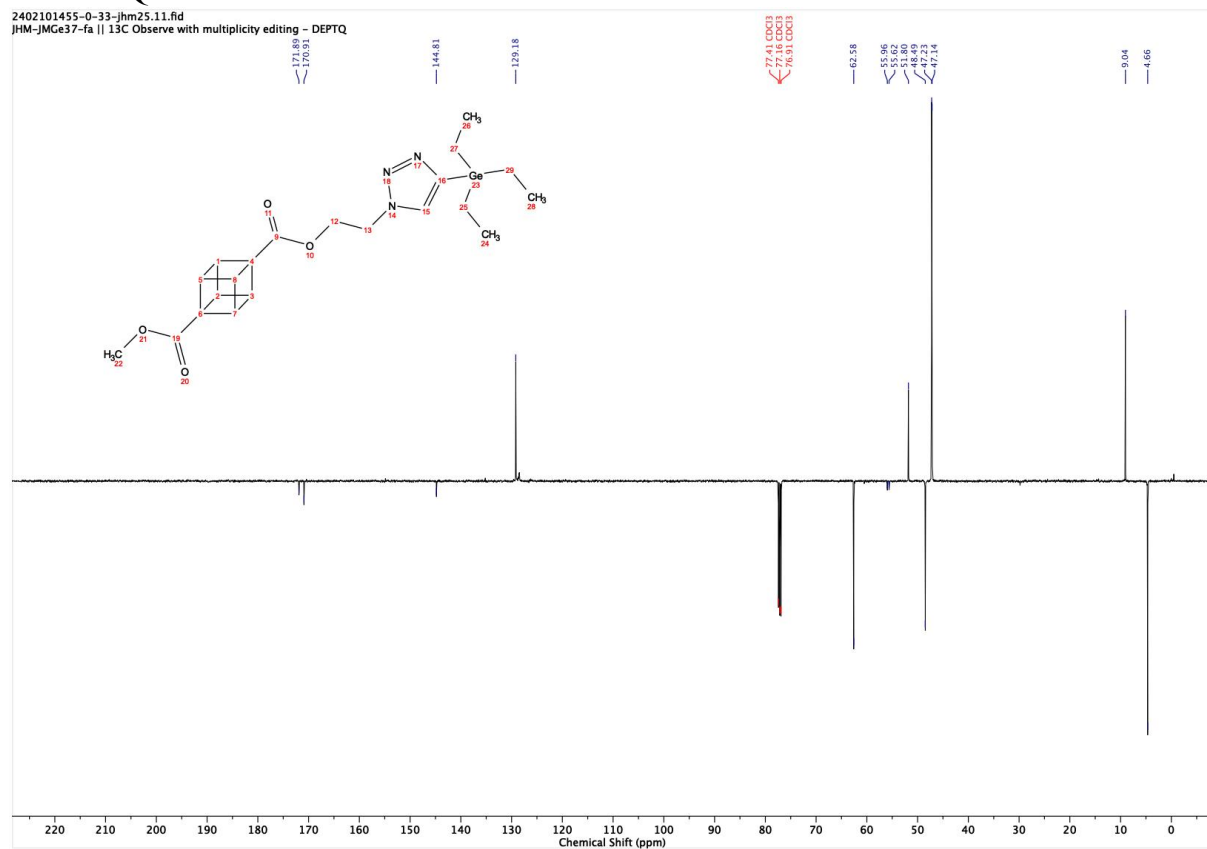

19 – <sup>1</sup>H

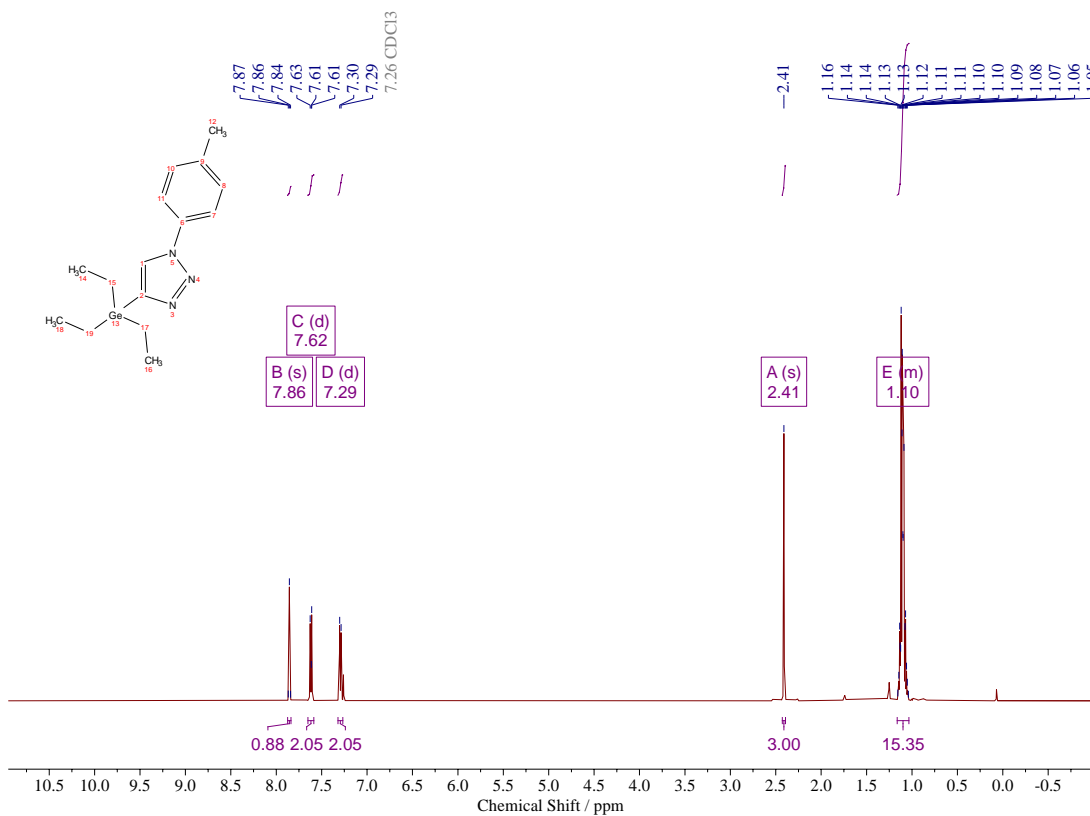

<sup>13</sup>C DEPTQ

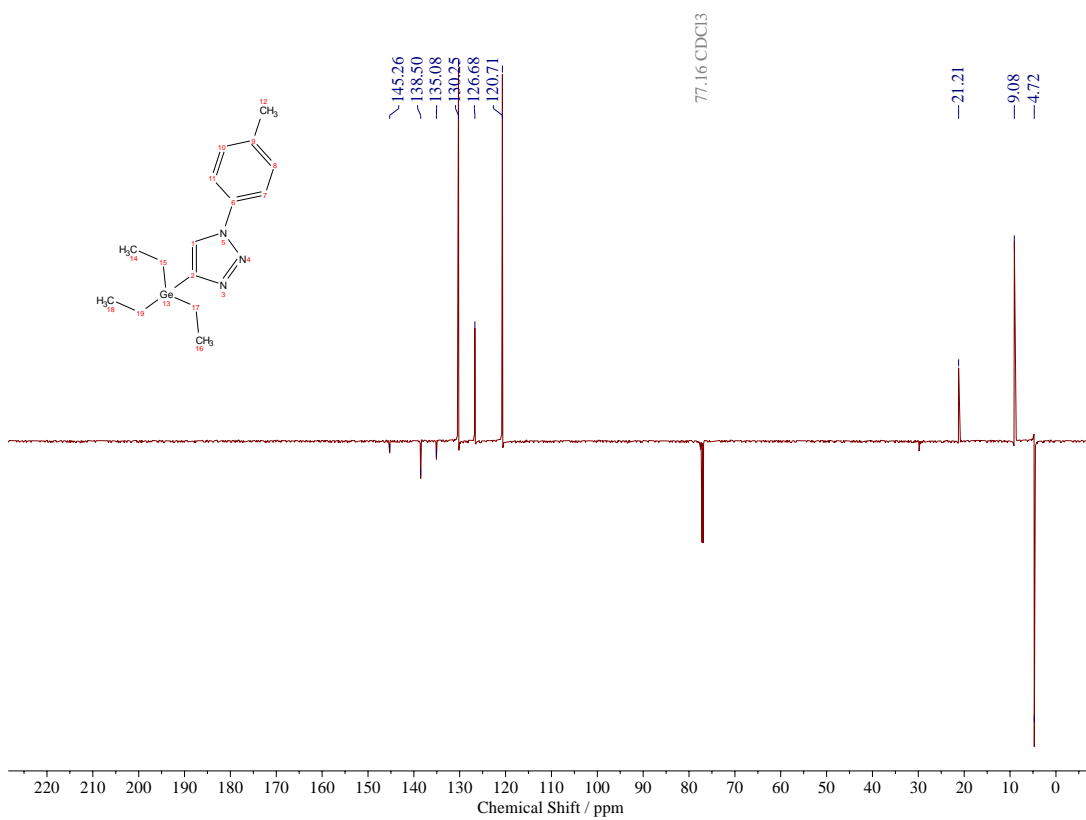

20 – <sup>1</sup>H

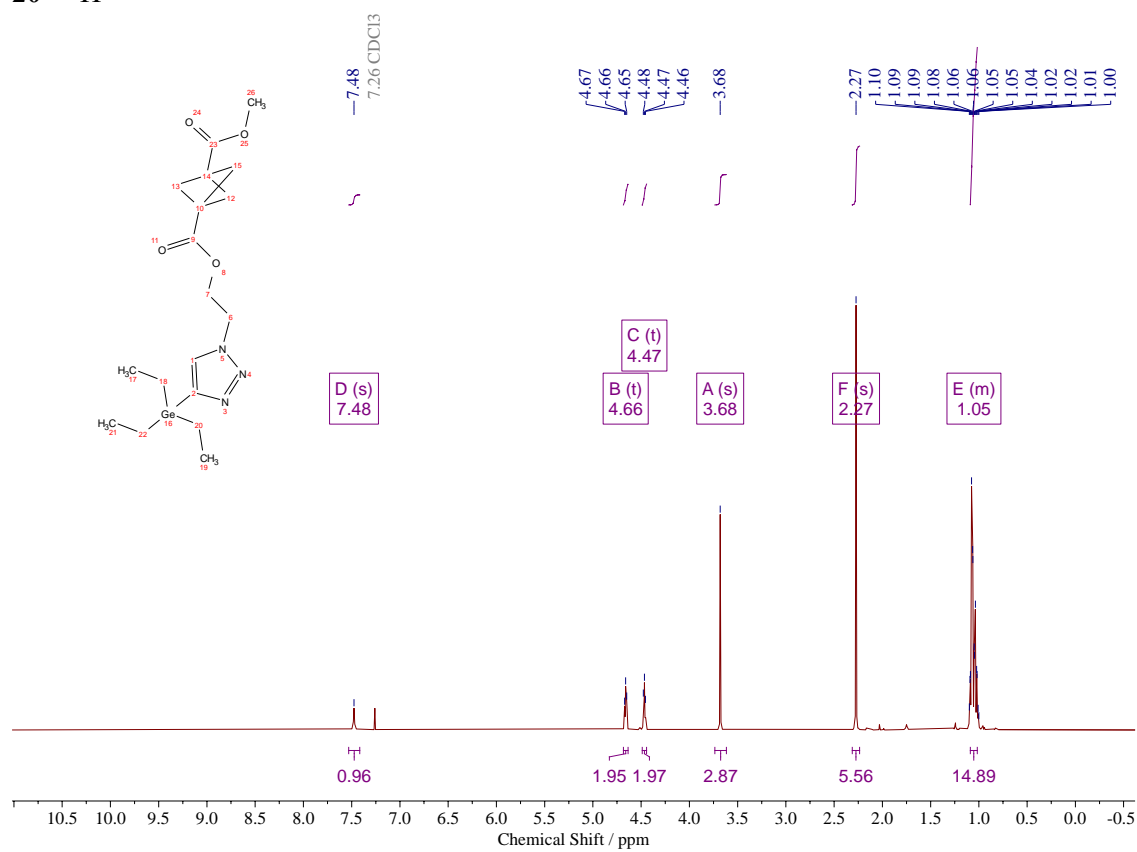

<sup>13</sup>C DEPTQ

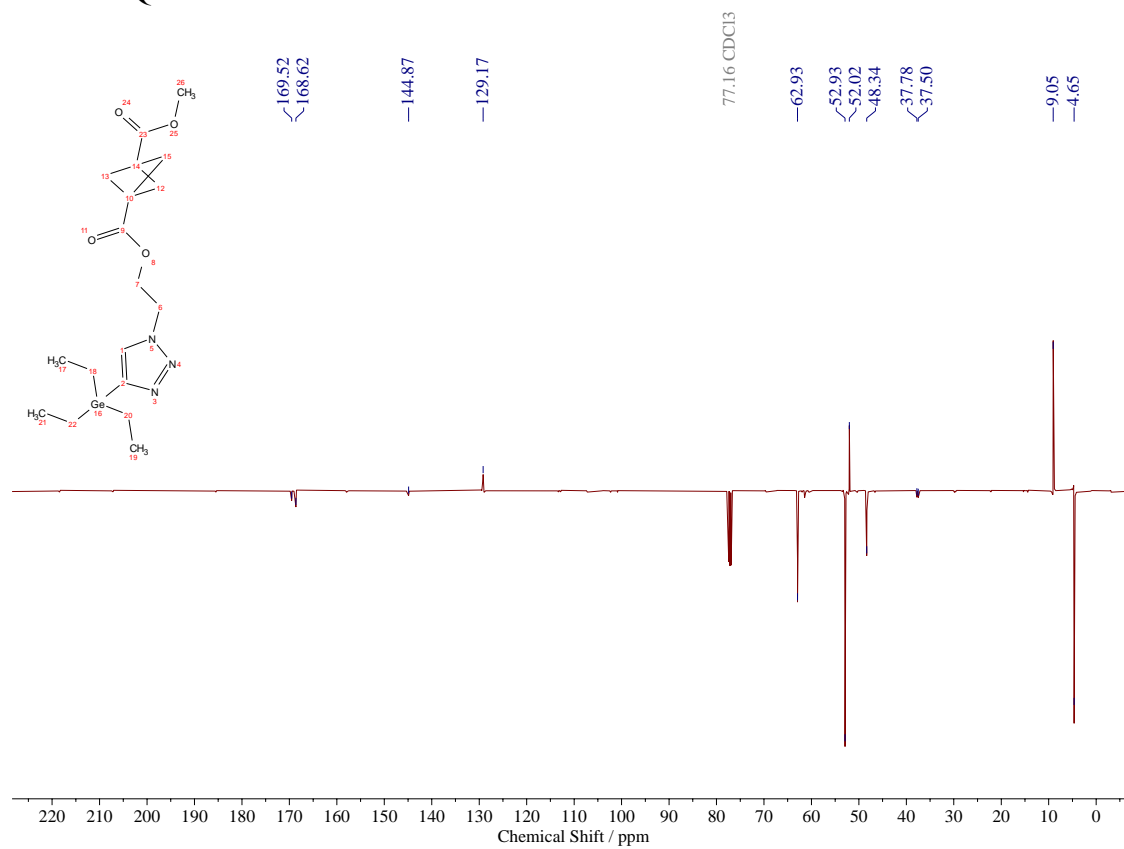

# 21 - <sup>1</sup>H

2402081734-3-21-jhm25.10.fid  
JHM-JMGe36-FA || 1H Observe

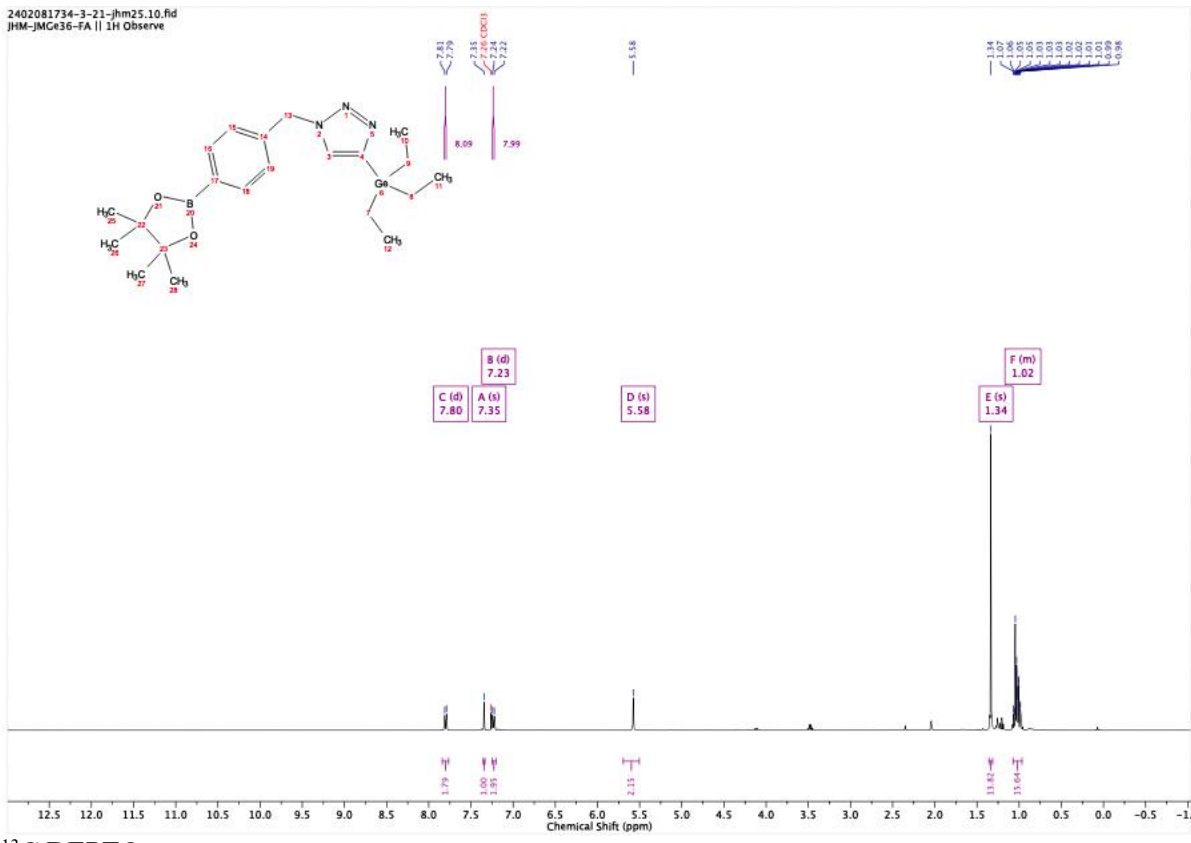

# <sup>13</sup>C DEPTQ

2402081734-3-21-jhm25.11.fid  
JHM-JMGe36-FA || <sup>13</sup>C Observe with multiplicity editing - DEPTQ

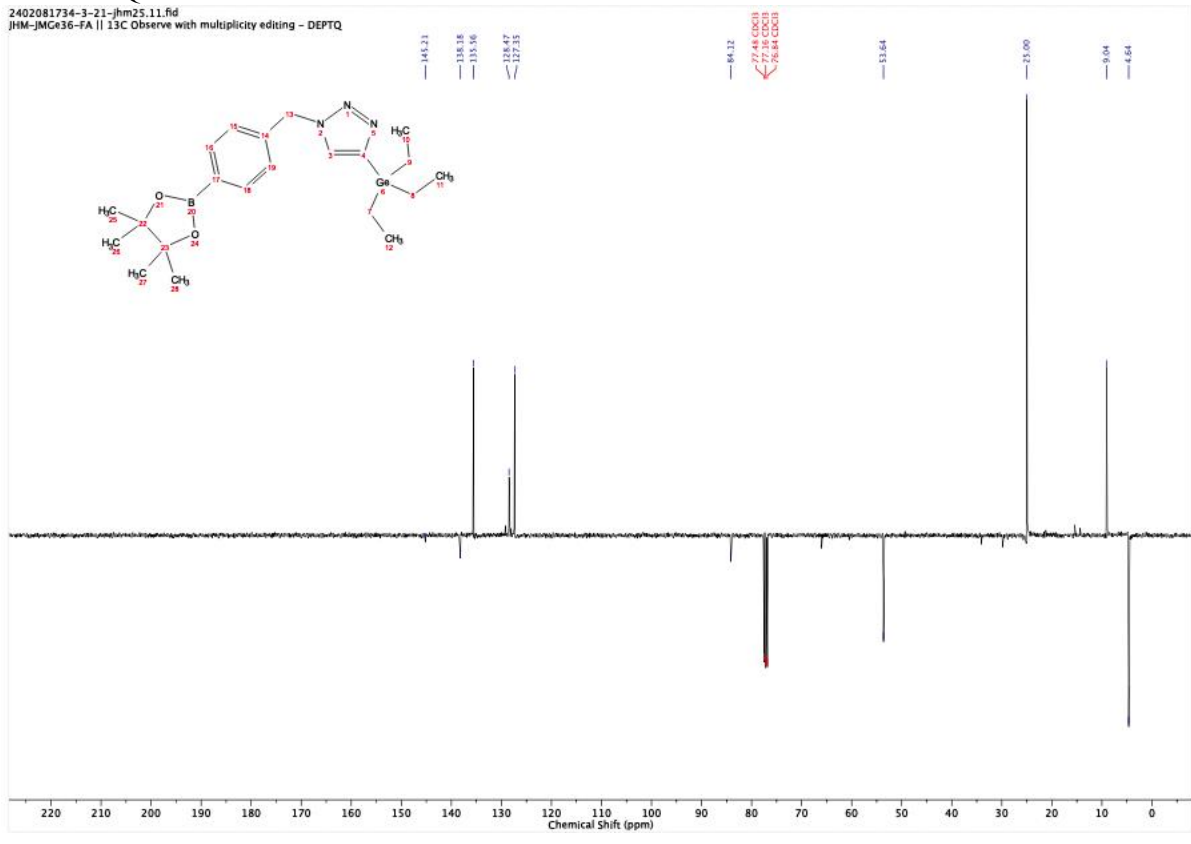

$^{11}\text{B}$

2402081734-3-21-jhm25.15.hd  
JHM-JMG636-FA || 11B Observe - SW=250ppm (Et2O,BF3/CDCl3 = 0ppm)

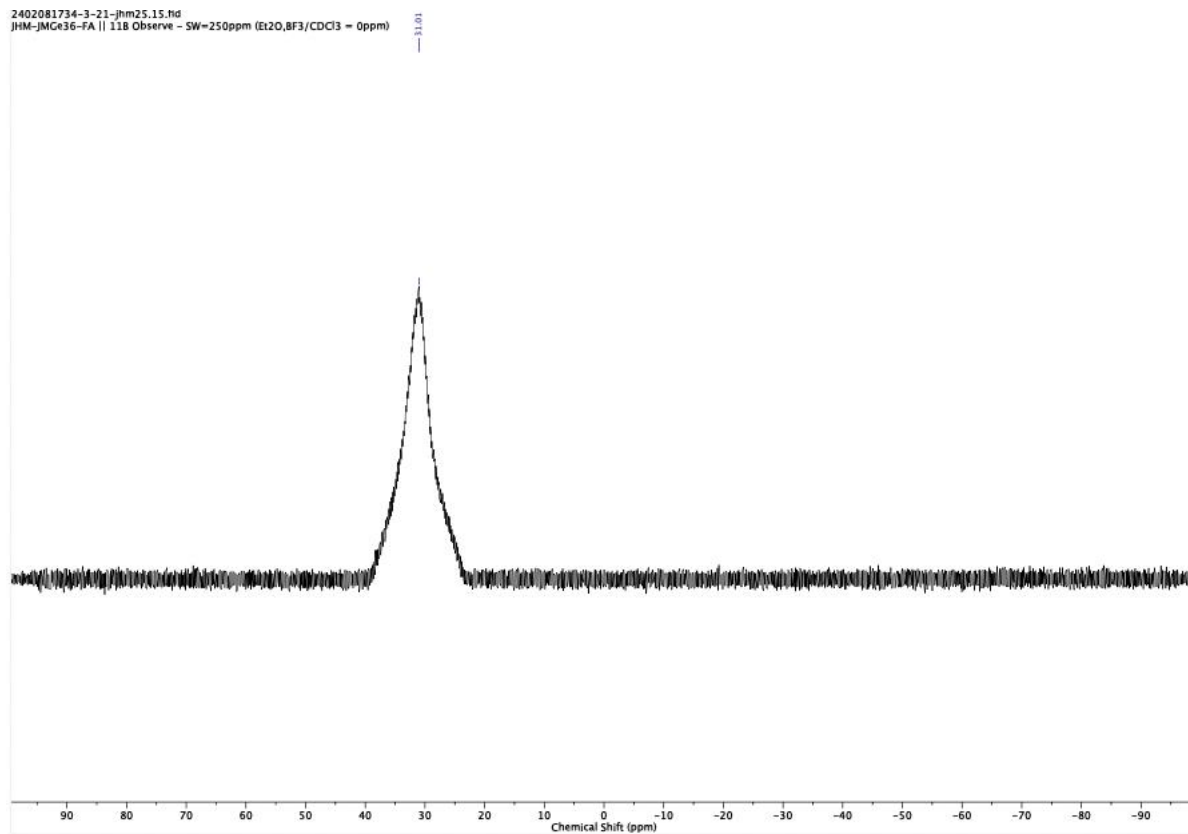

# 22 - <sup>1</sup>H

2402011805-3-16-jhm25.10.fid  
JHM-JMGe13-fa || 1H Observe

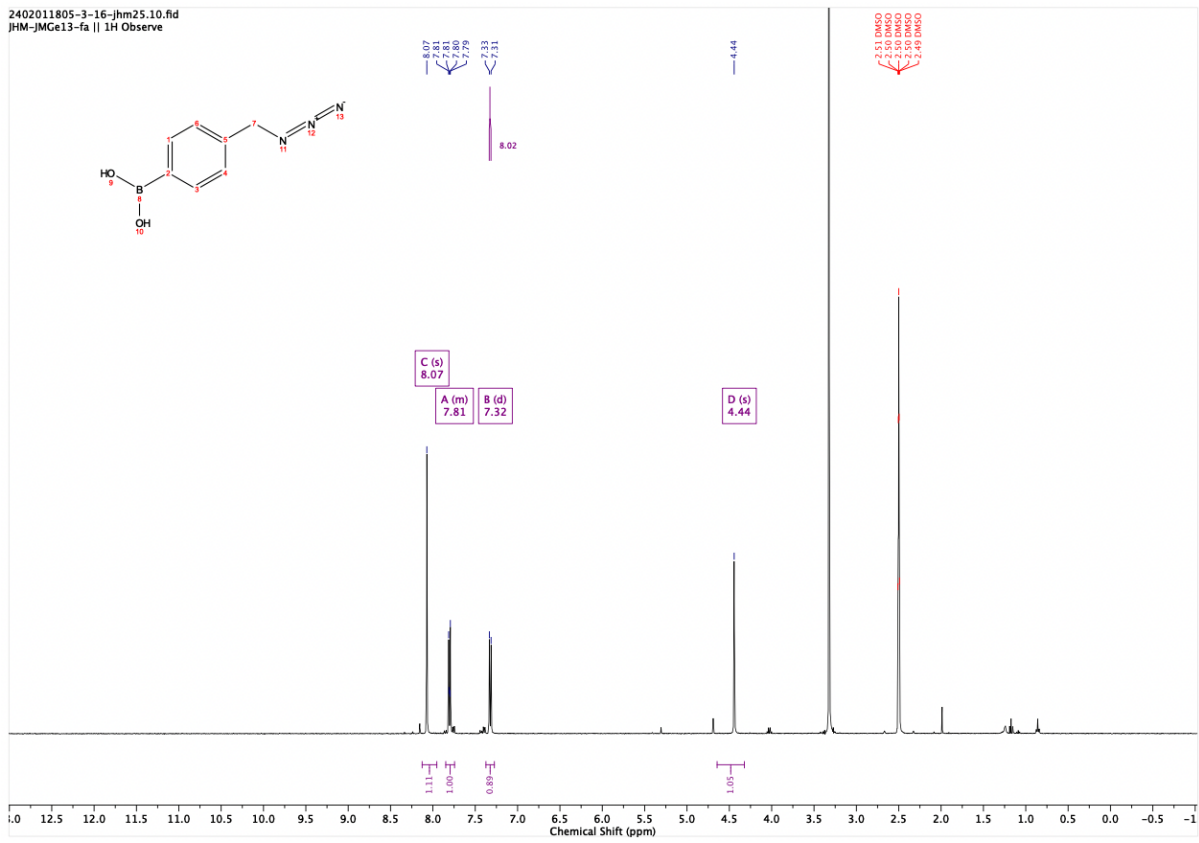

# <sup>13</sup>C DEPTQ

2402011805-3-16-jhm25.11.fid  
JHM-JMGe13-fa || 13C Observe with multiplicity editing - DEPTQ

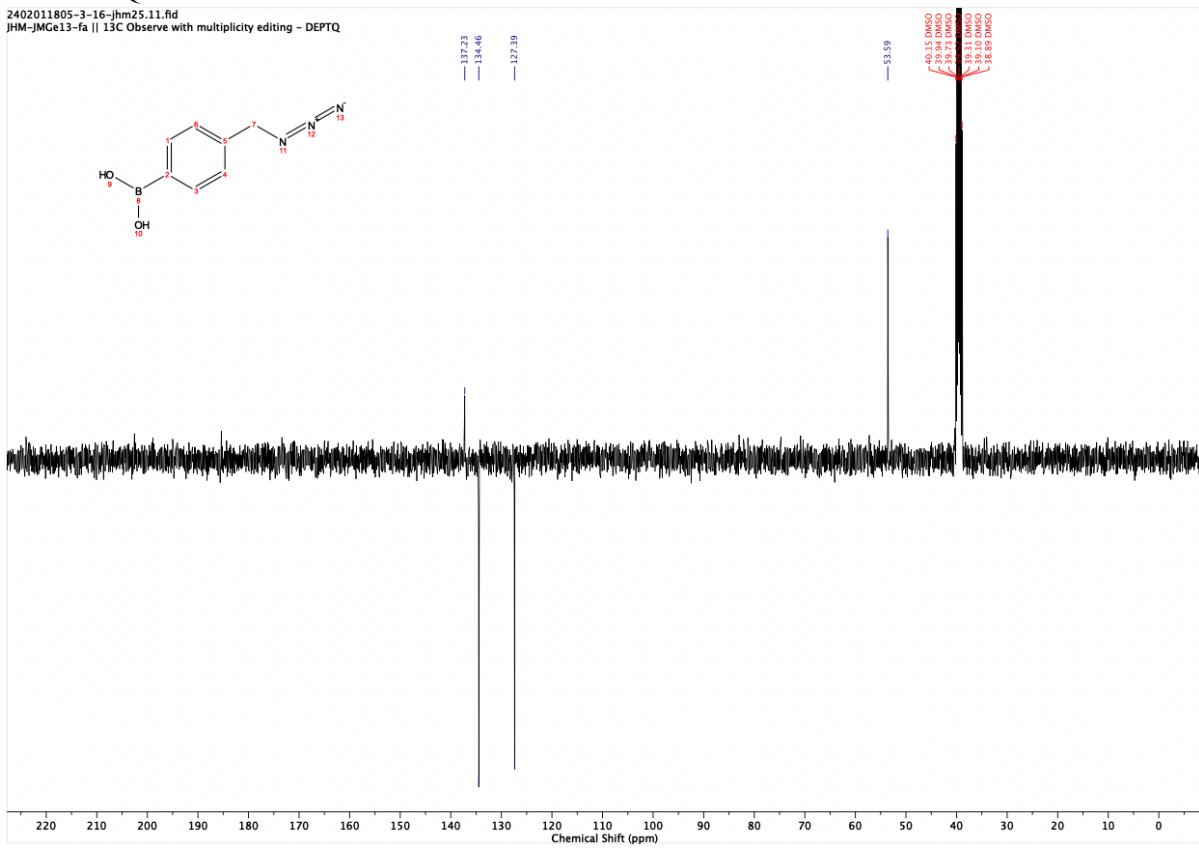



$^{11}\text{B}$

2401191701-3-1-jhm25.15.fid  
JMGe02-FA || 118 Observe - SW=250ppm (Et2O, BF3/CDCl3 = 0ppm)

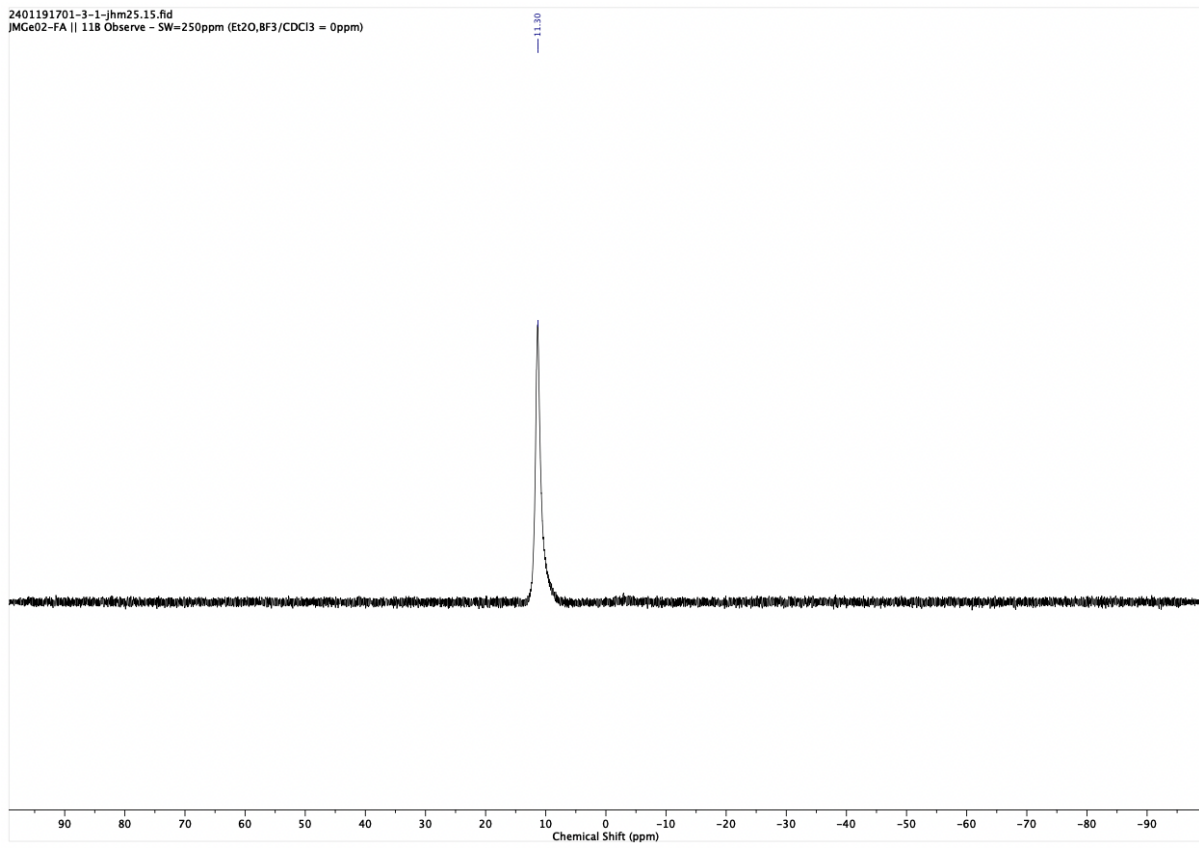



24 - <sup>1</sup>H

02211725-0-20-jhm25.10.fid  
M-JMGe44-fa || 1H Observe

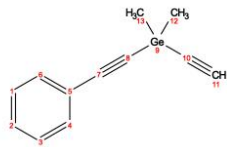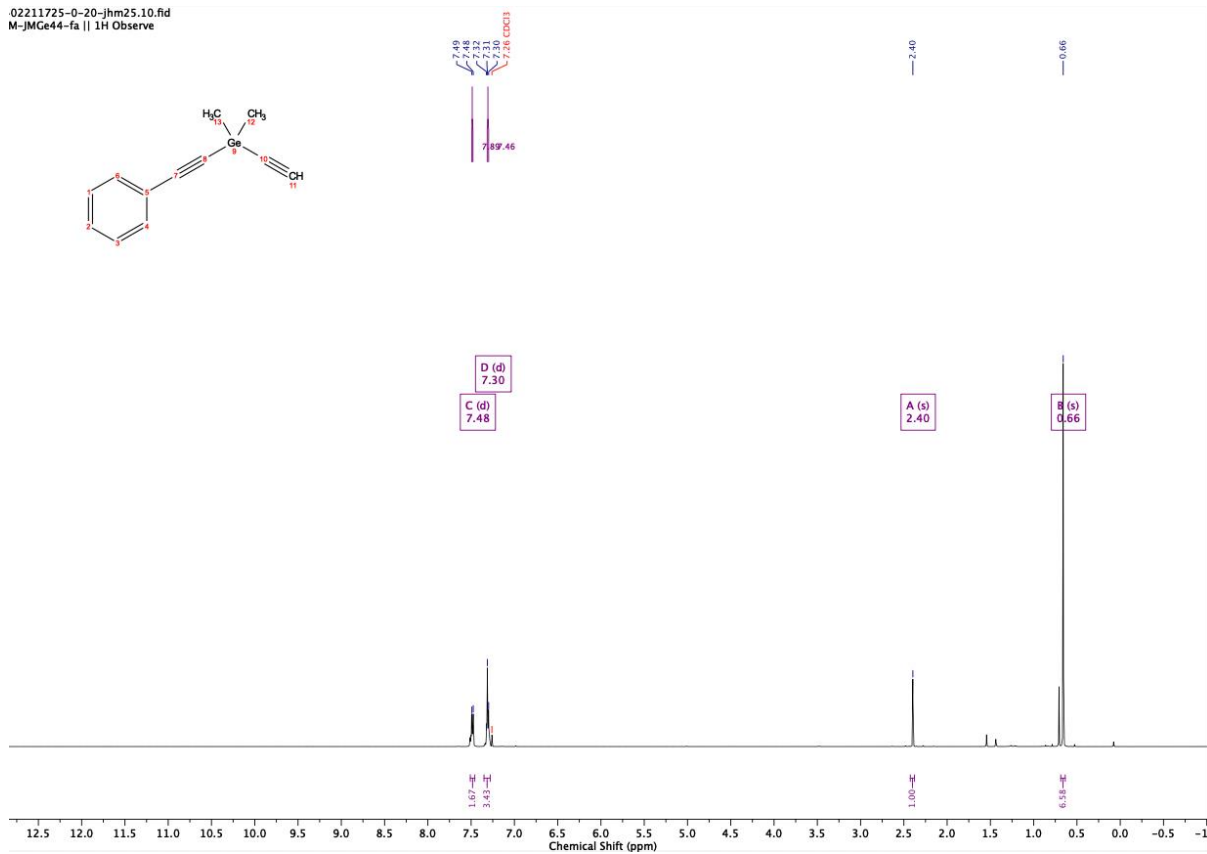

<sup>13</sup>C DEPTQ

2402211725-0-20-jhm25.11.fid  
JHM-JMGe44-fa || 13C Observe with multiplicity editing - DEPTQ

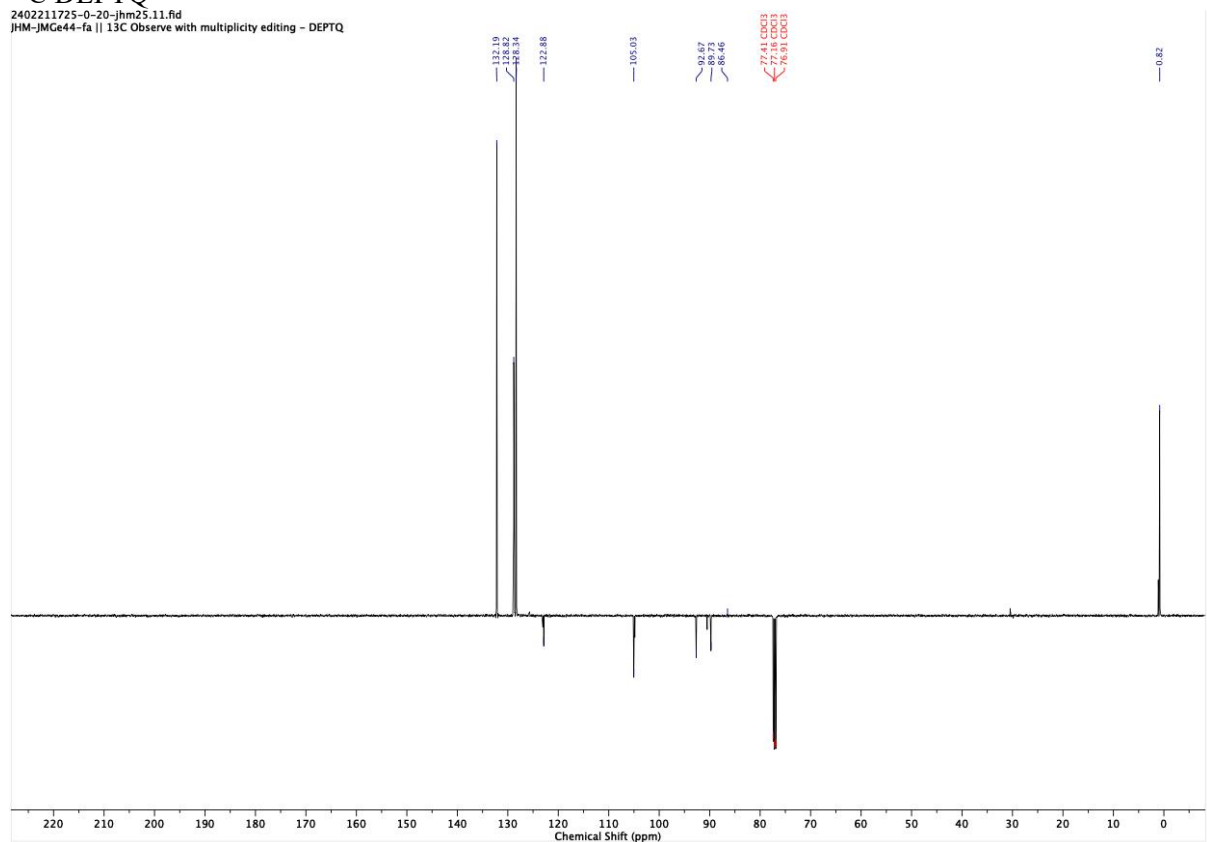

25 – <sup>1</sup>H

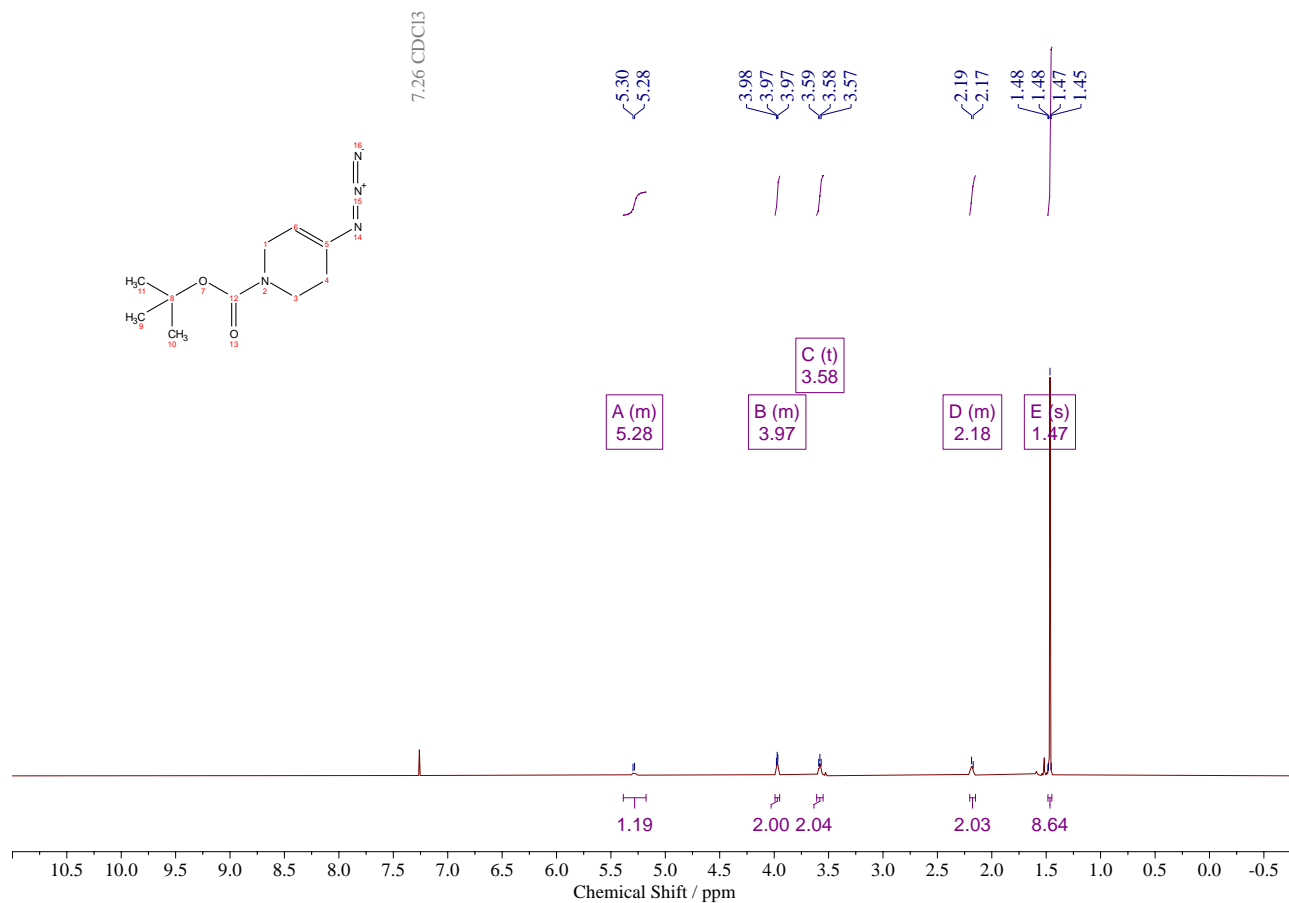

<sup>13</sup>C DEPTQ

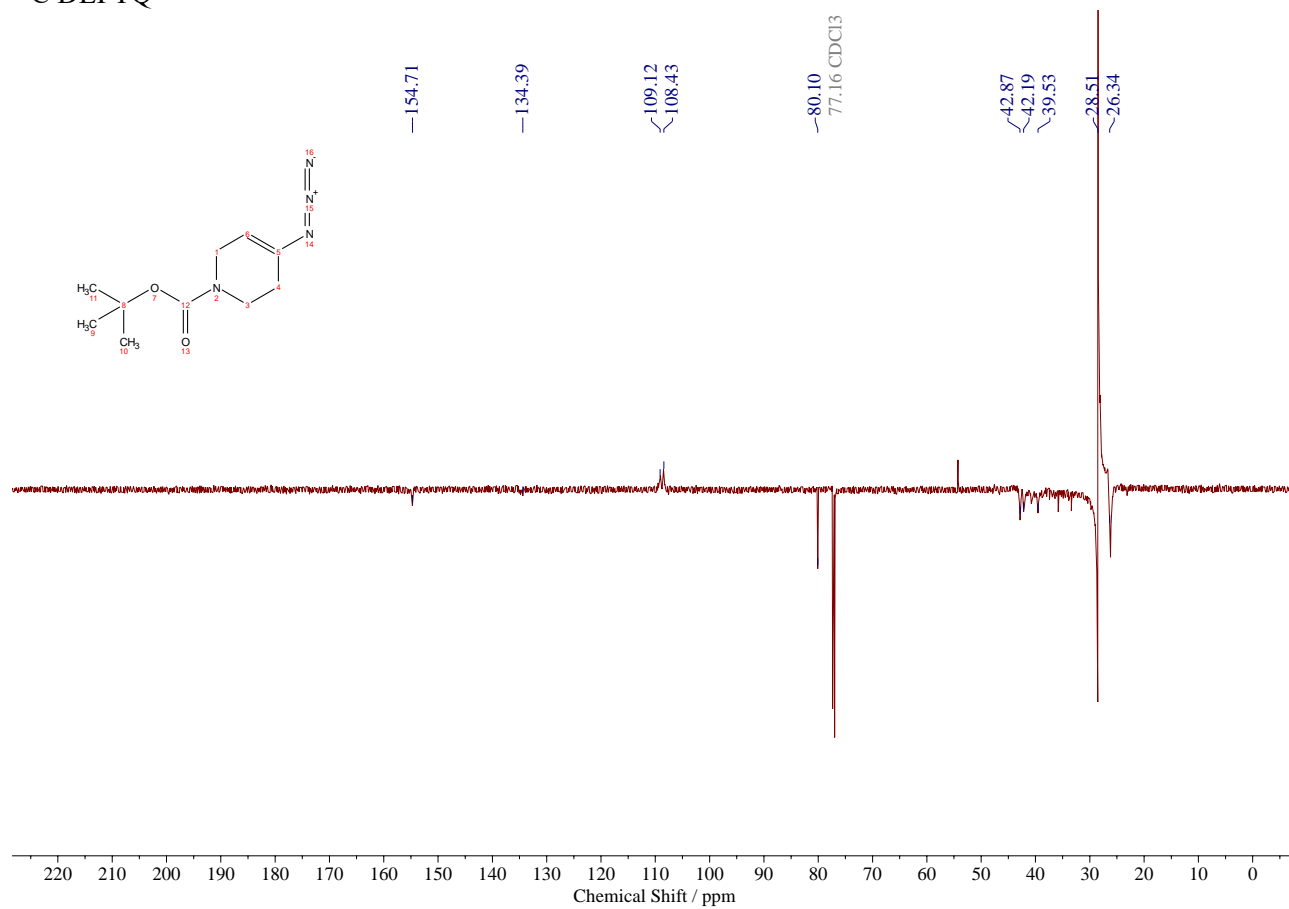

26 – <sup>1</sup>H

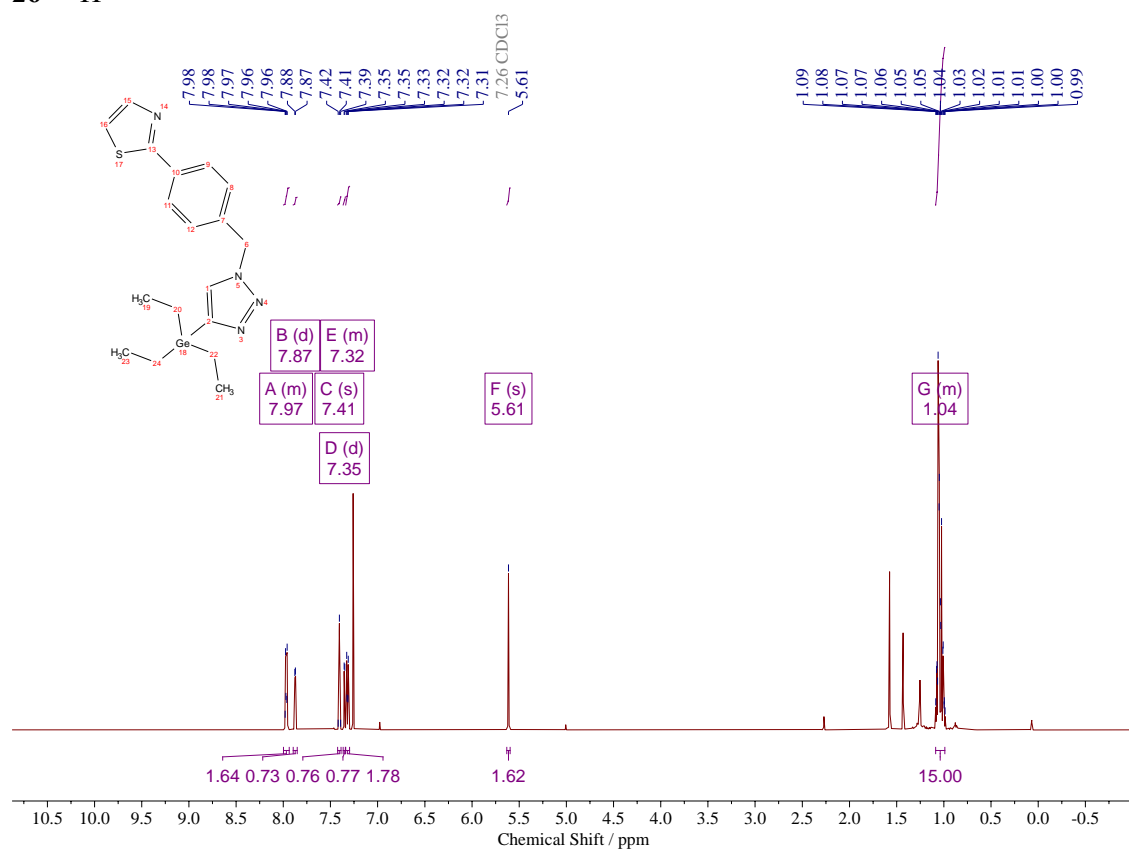

<sup>13</sup>C DEPTQ

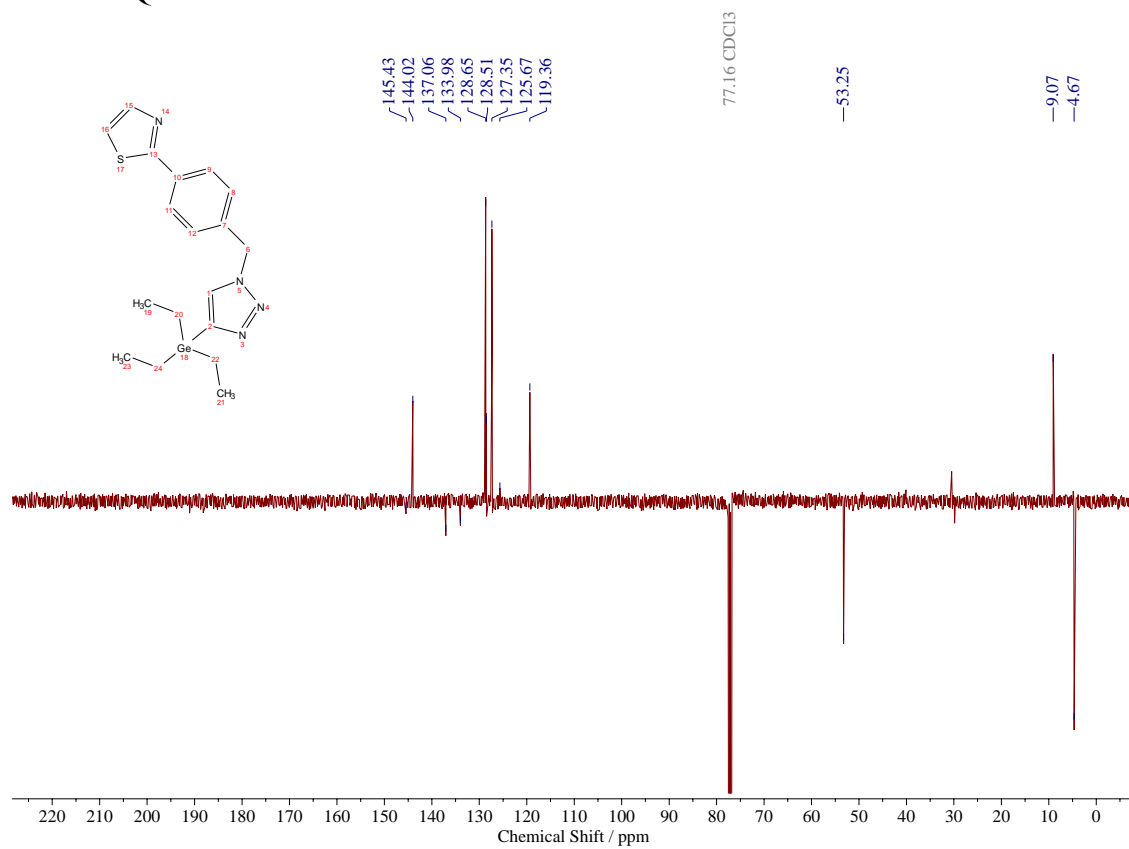

# 27 - <sup>1</sup>H

2402231805-1-11-jhm25.10.fid  
JHM-JMGe26-fa || 1H Observe

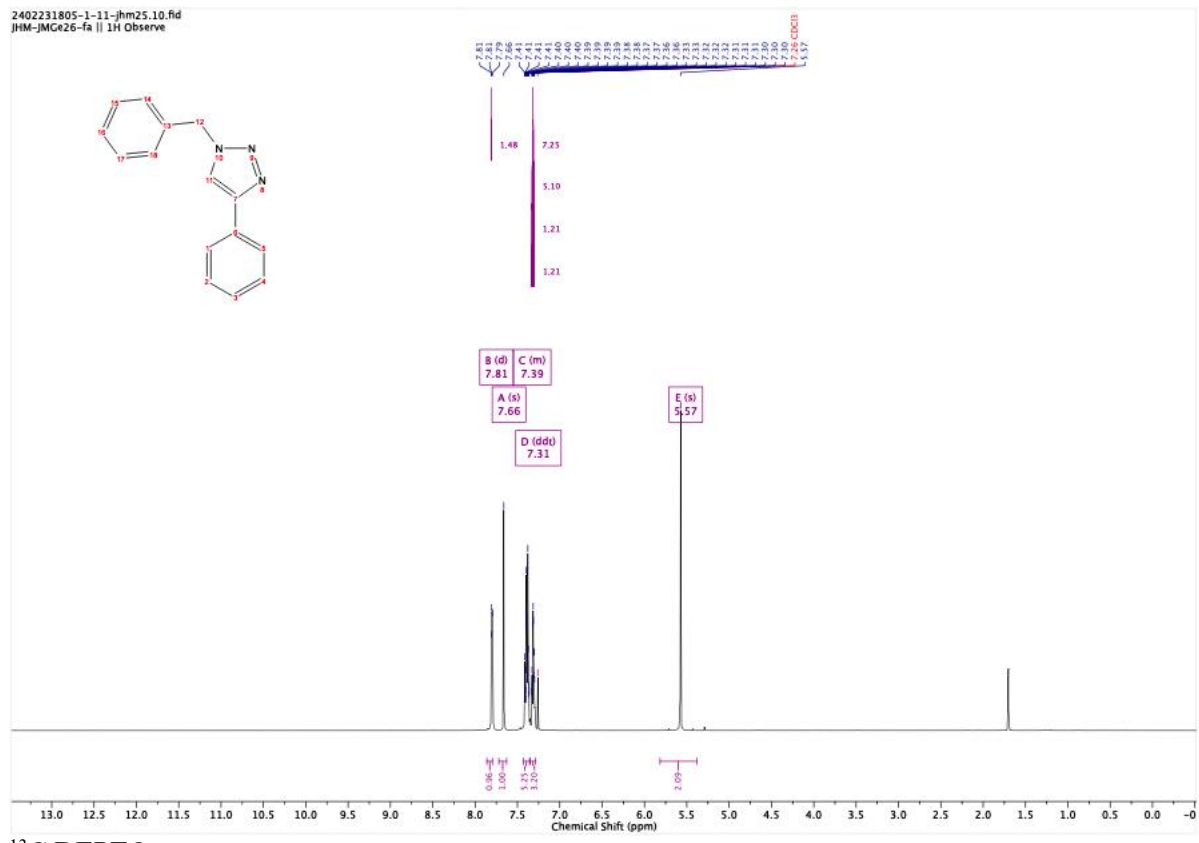

# <sup>13</sup>C DEPTQ

2402231805-1-11-jhm25.11.fid  
JHM-JMGe26-fa || 13C Observe with multiplicity editing - DEPTQ

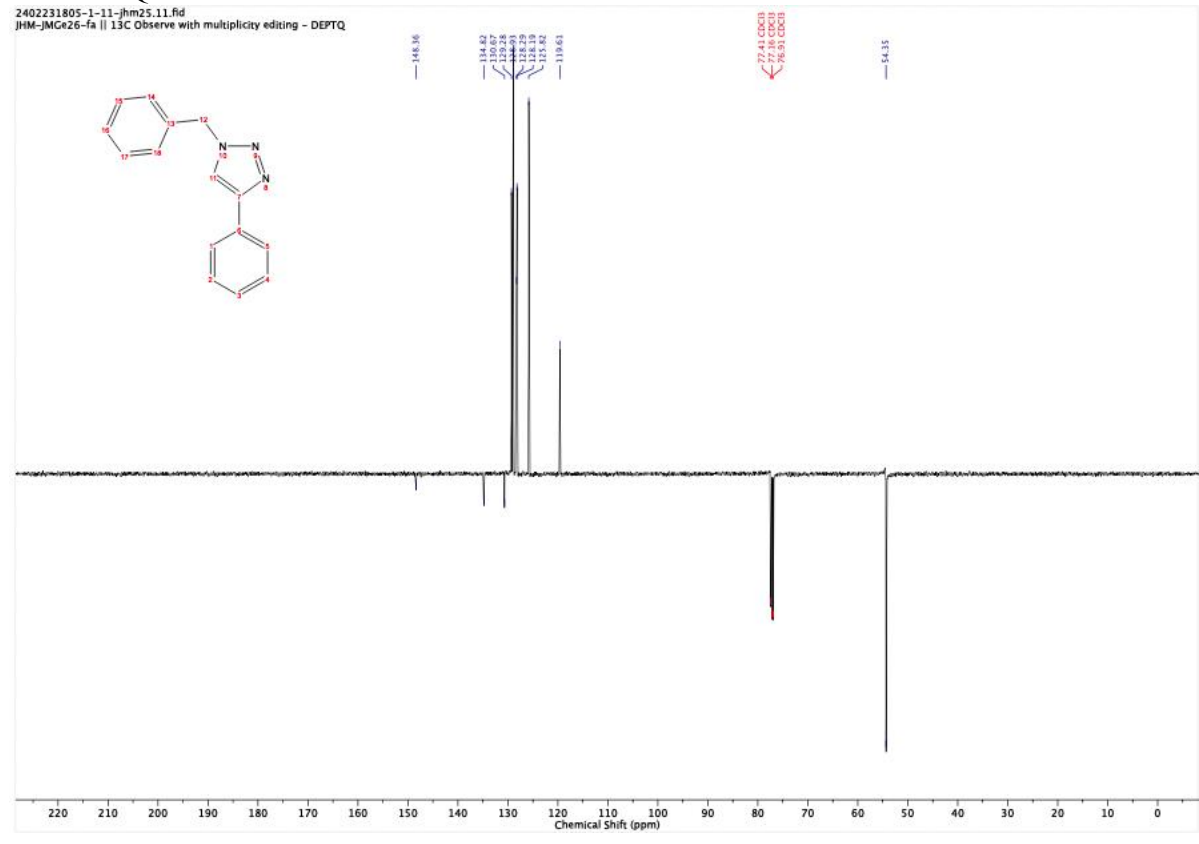

28 - <sup>1</sup>H

2402241256-0-16-jhm25.10.fid  
JHM-JMGe48-fa || 1H Observe

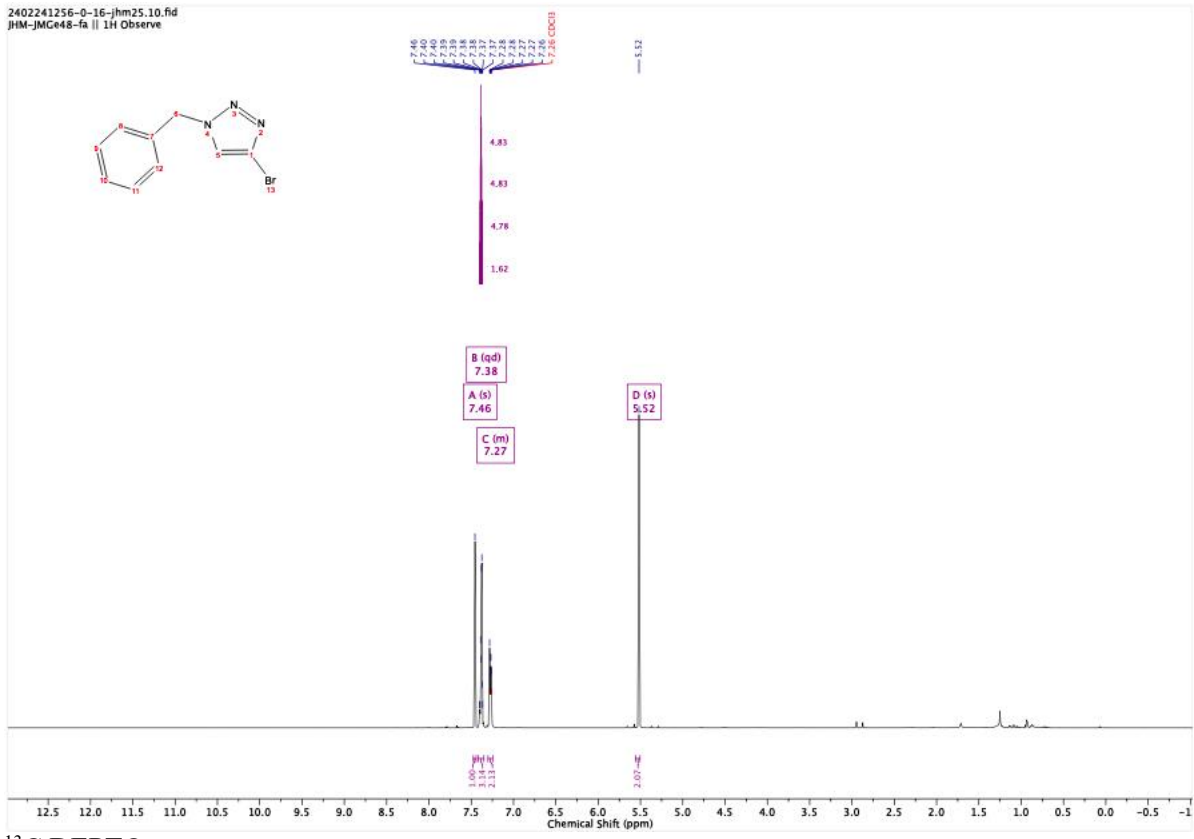

<sup>13</sup>C DEPTQ

2402241256-0-16-jhm25.11.fid  
JHM-JMGe48-fa || 13C Observe with multiplicity editing - DEPTQ

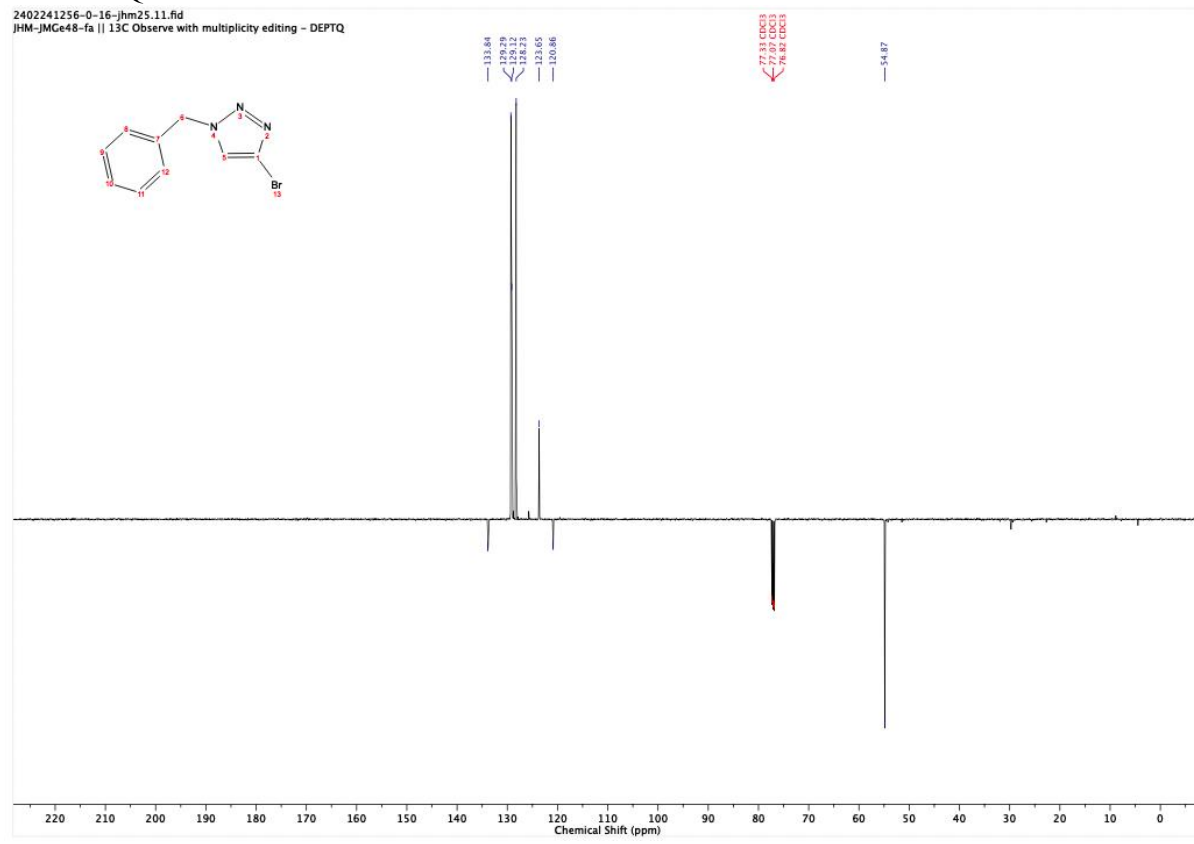

# 29 - <sup>1</sup>H

2403051812-3-16-jhm25.10.fid  
JHM-JMGe59-fa || 1H Observe

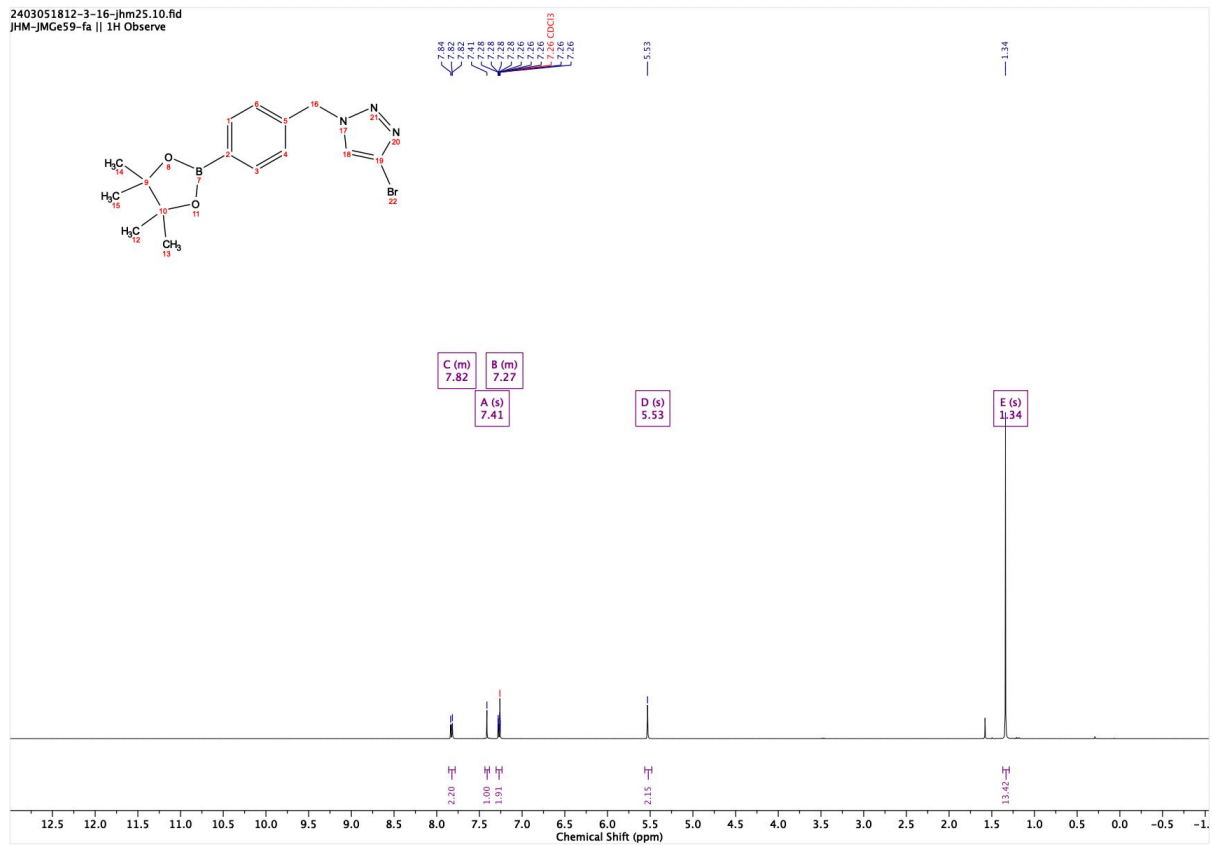

# <sup>13</sup>C DEPTQ

2403051812-3-16-jhm25.11.fid  
JHM-JMGe59-fa || 13C Observe with multiplicity editing - DEPTQ

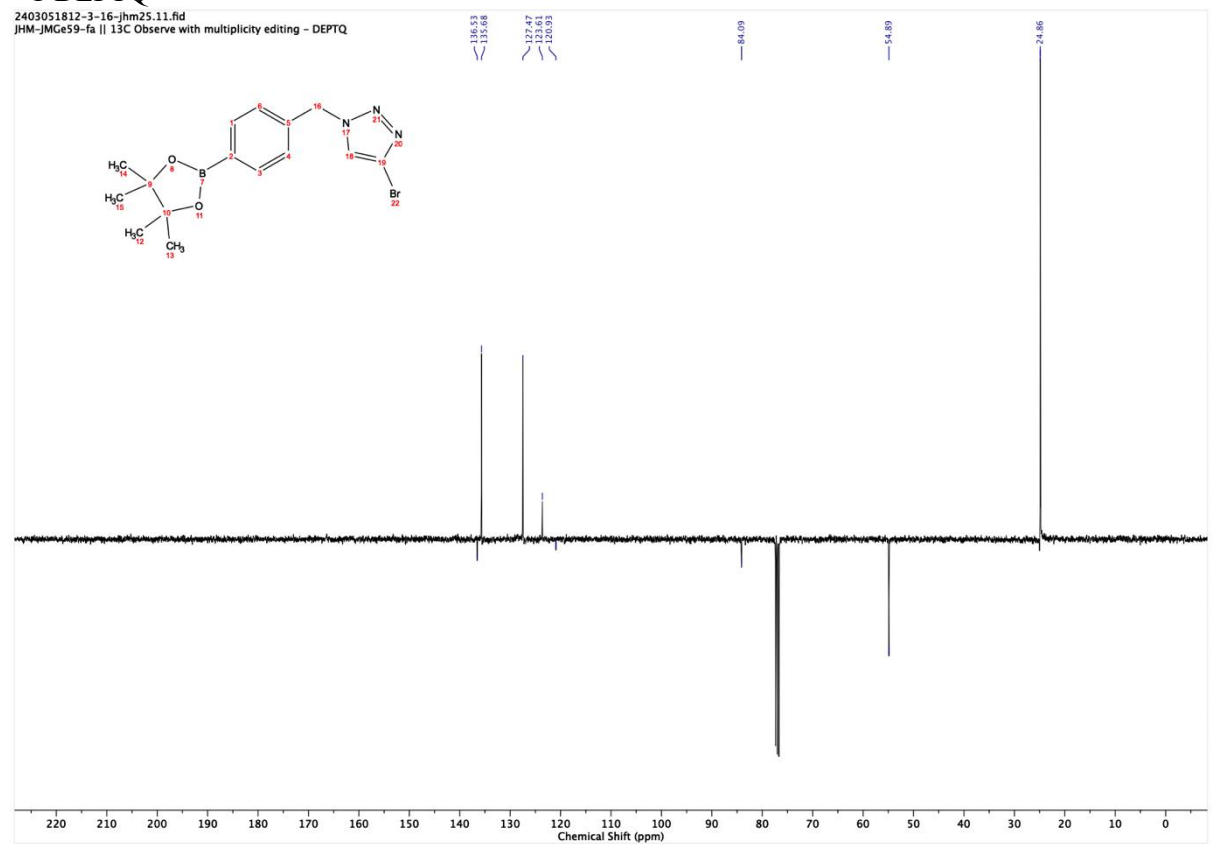

$^{11}\text{B}$

2403051812-3-16-jhm25.15.fid  
jhm-jmC659-fa || 11B Observe - SW=250ppm (Et2O,BF3/CDCl3 = 0ppm)

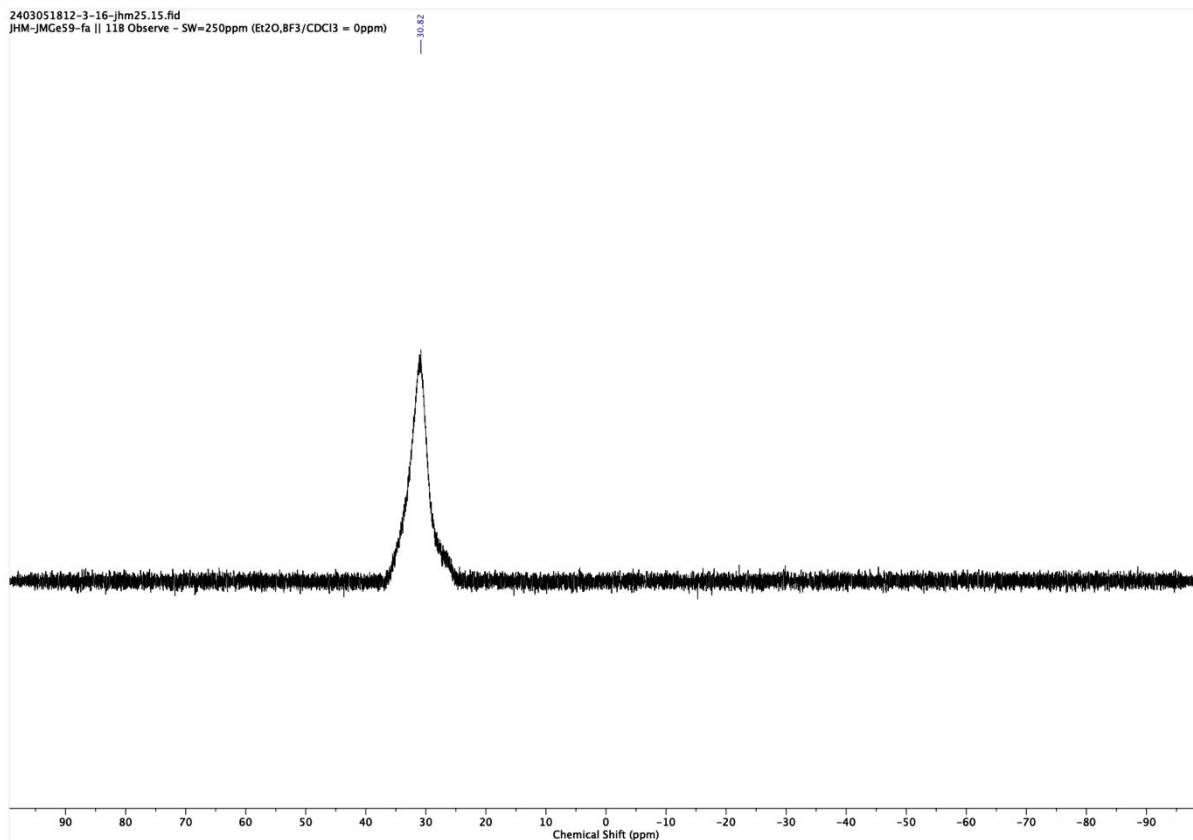

# 30 - <sup>1</sup>H

2402291725-0-8-jhm25.10.fid  
jhm-jmGe57-fa || 1H Observe

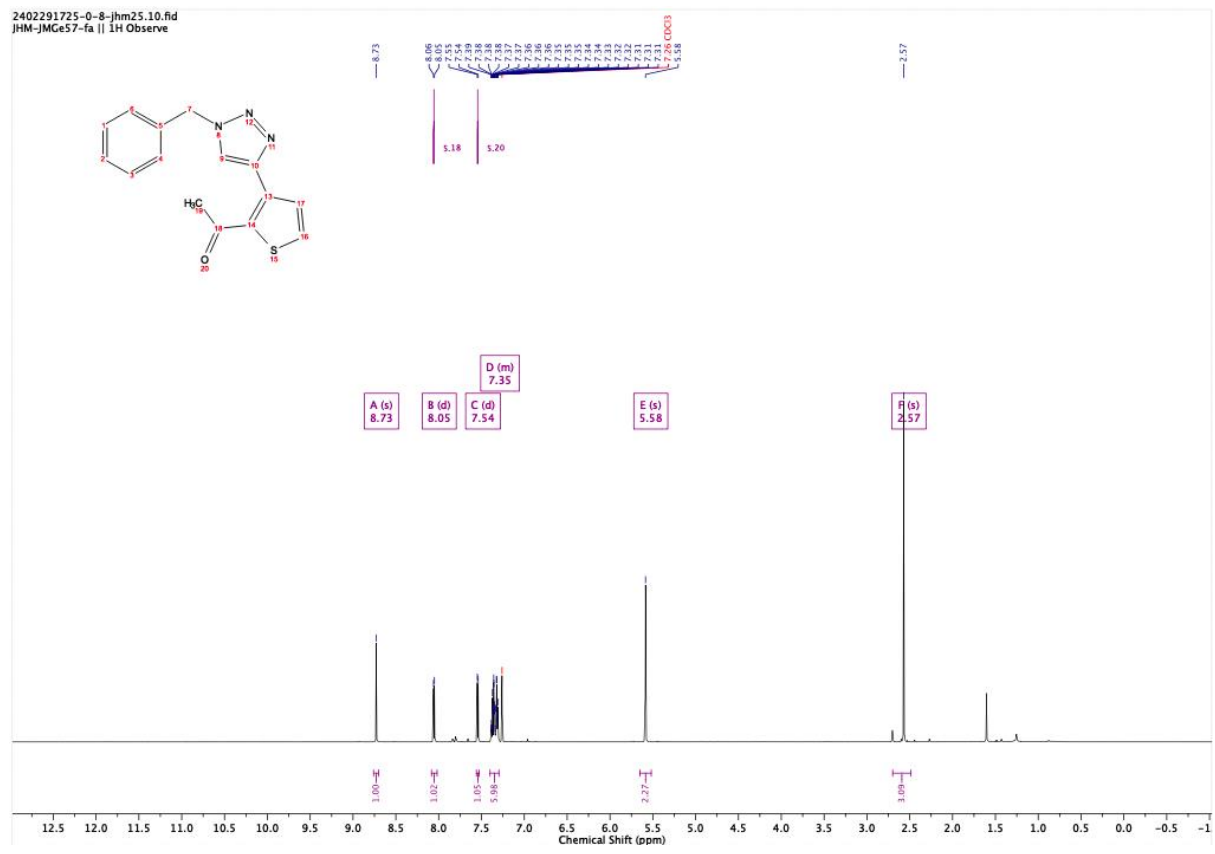

# <sup>13</sup>C DEPTQ

2402291725-0-8-jhm25.11.fid  
jhm-jmGe57-fa || <sup>13</sup>C Observe with multiplicity editing - DEPTQ

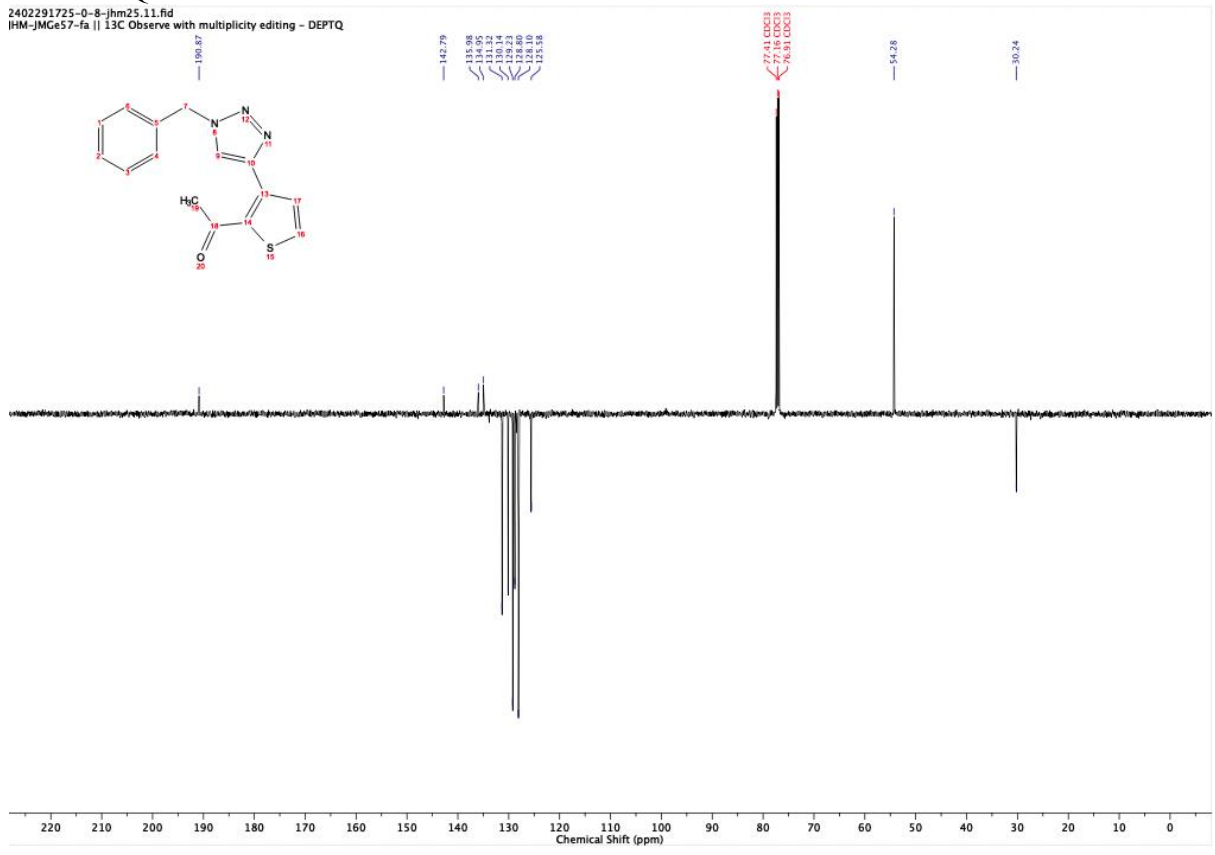



# 31 - 1H

2402231805-3-26-jhm25.10.fid  
jhm-jmGe42-fa || 1H Observe

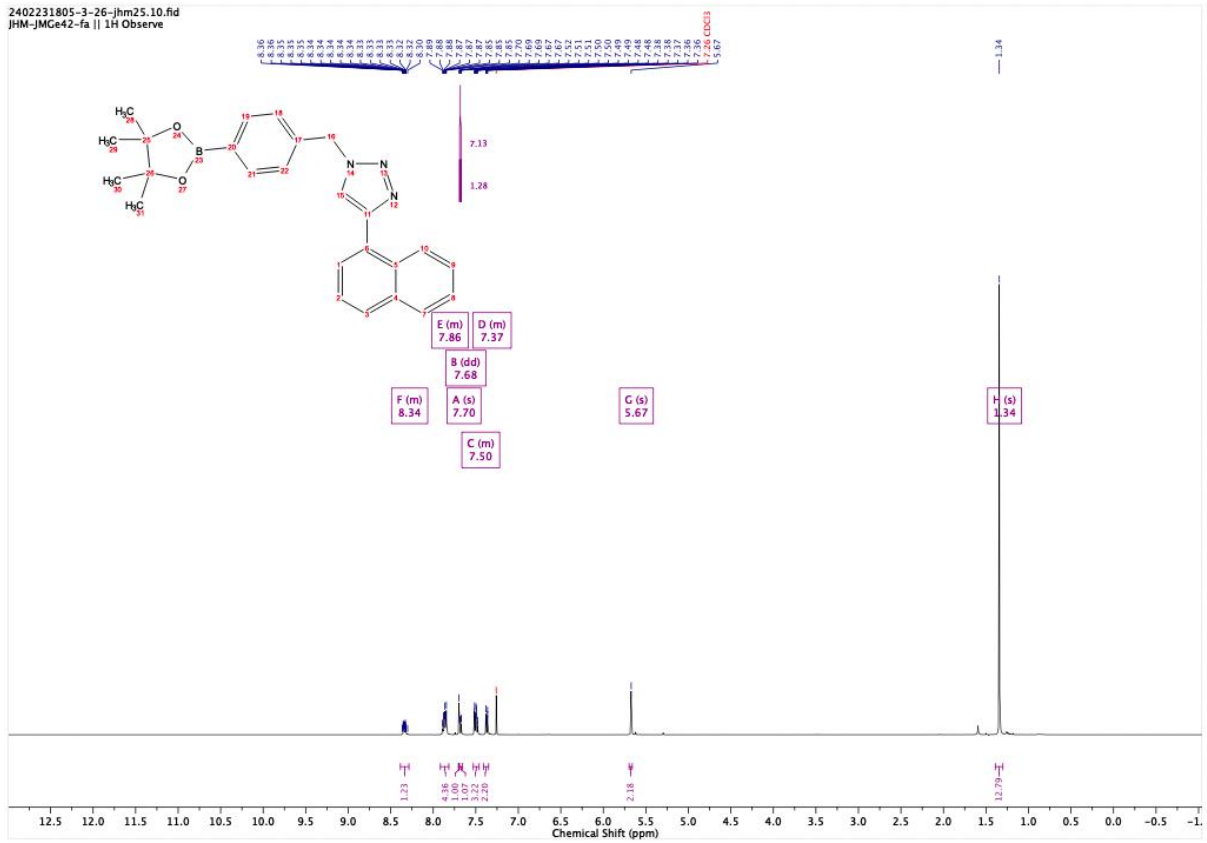

# 13C DEPTQ

2402231805-3-26-jhm25.11.fid  
jhm-jmGe42-fa || 13C Observe with multiplicity editing - DEPTQ

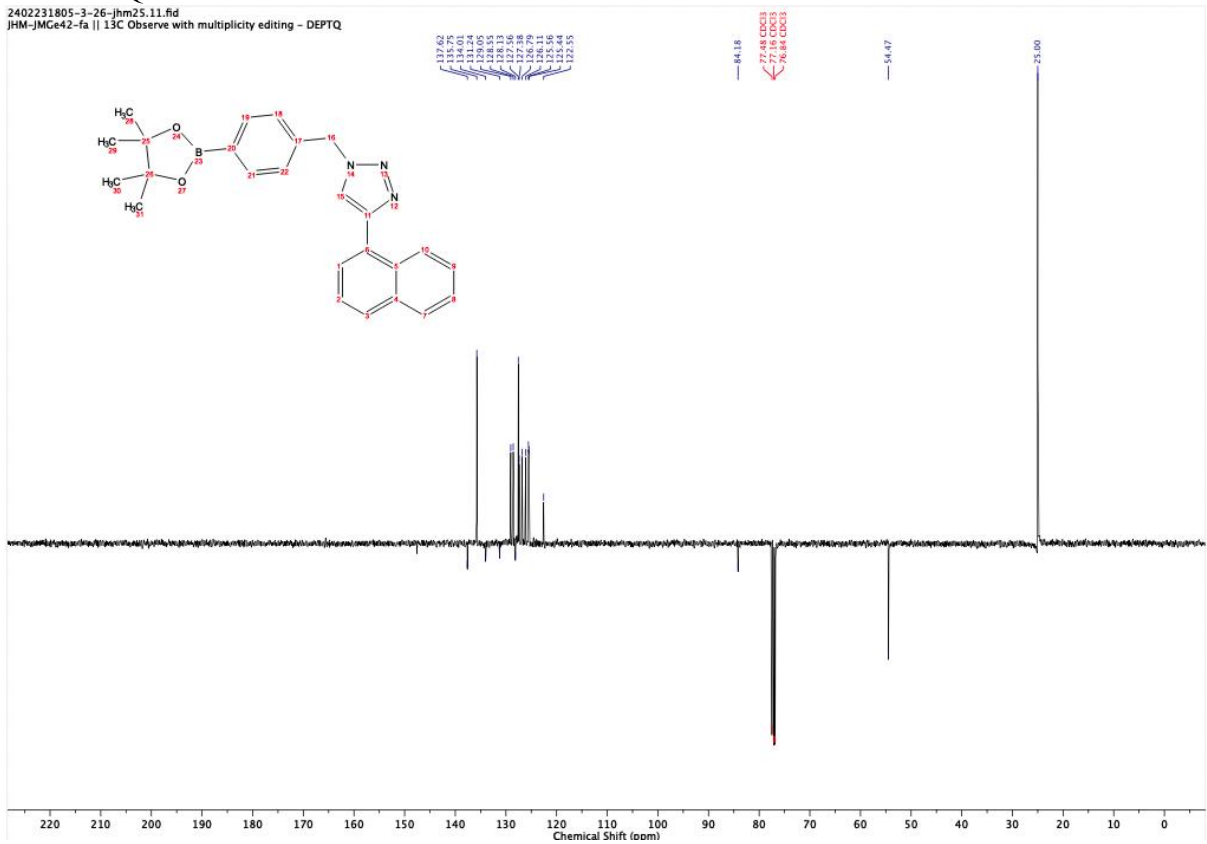

$^{11}\text{B}$

2402231805-3-26-jhm25.15.fid  
JHM-jMGe42-fa || 11B Observe - SW=250ppm (Et2O,BF3/CDCI3 = 0ppm)

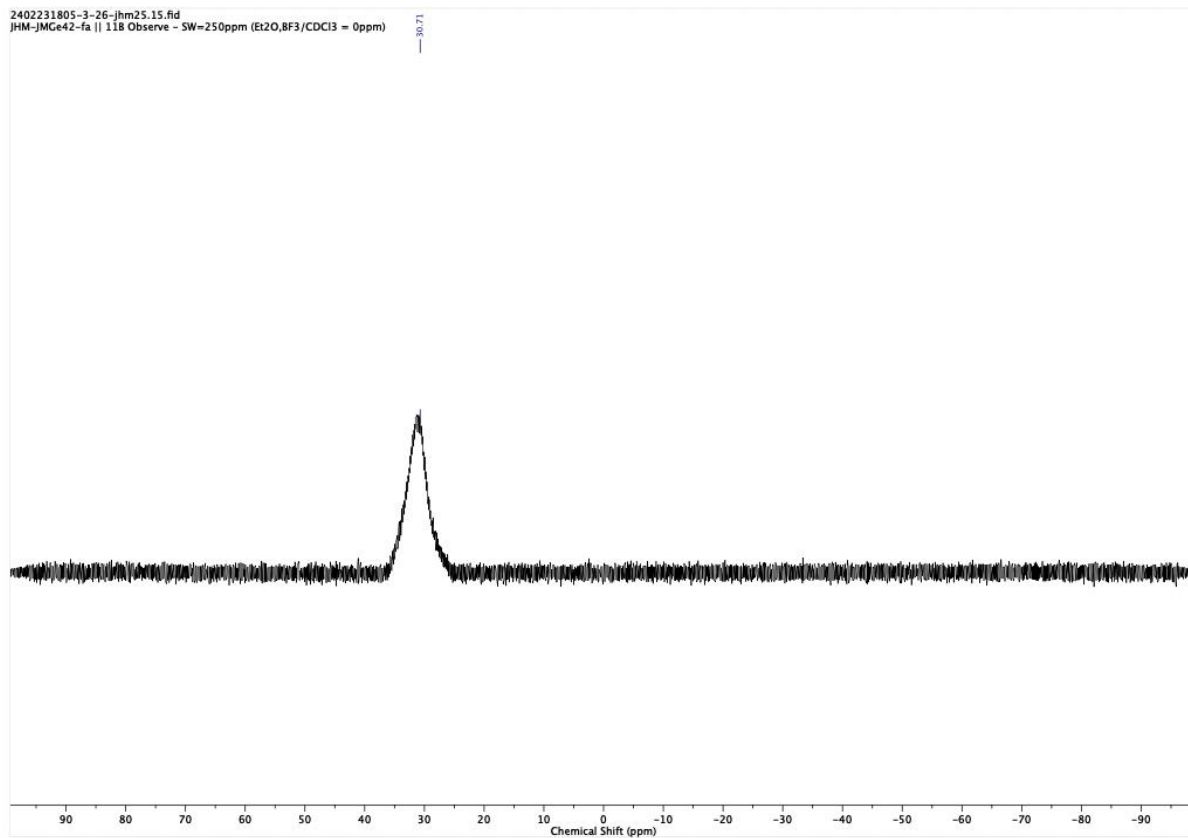

32 - <sup>1</sup>H

2402211725-0-17-jhm25.10.fid  
JHM-JMGe41-fa || 1H Observe

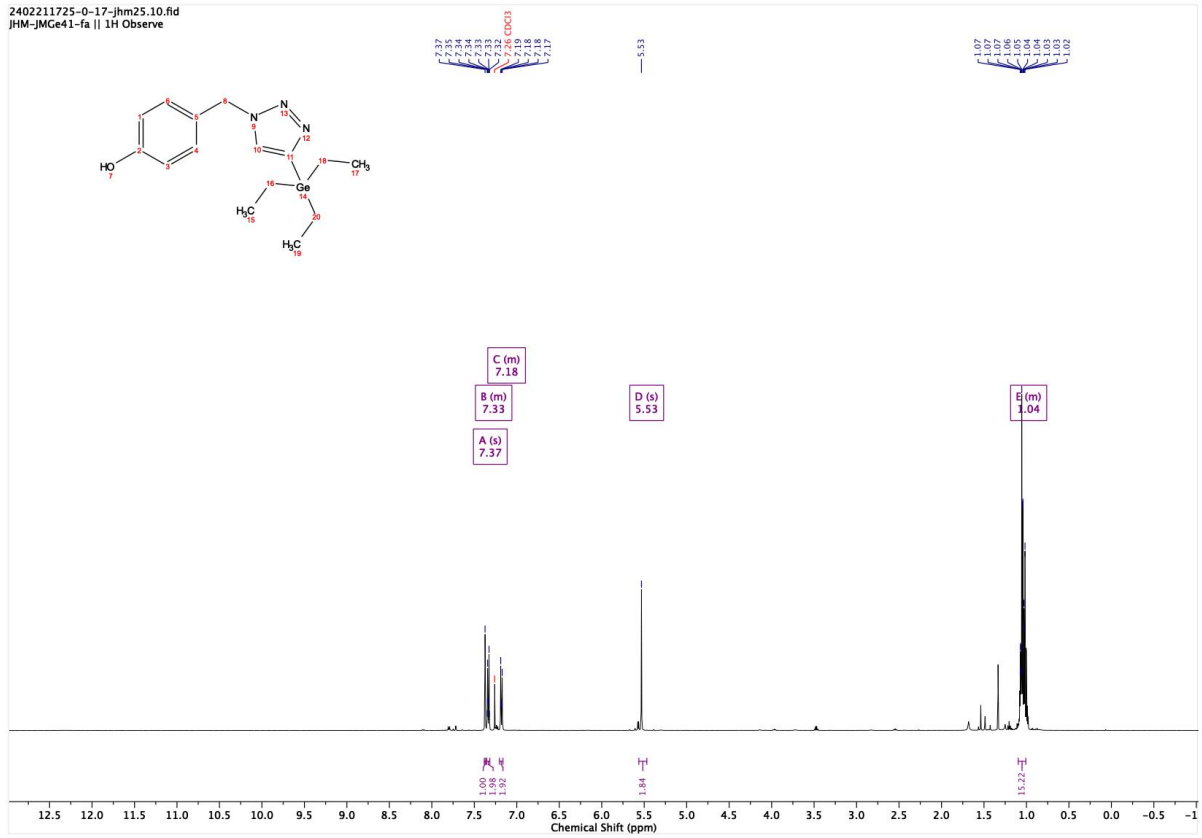

<sup>13</sup>C DEPTQ

2402211725-0-17-jhm25.11.fid  
JHM-JMGe41-fa || <sup>13</sup>C Observe with multiplicity editing - DEPTQ

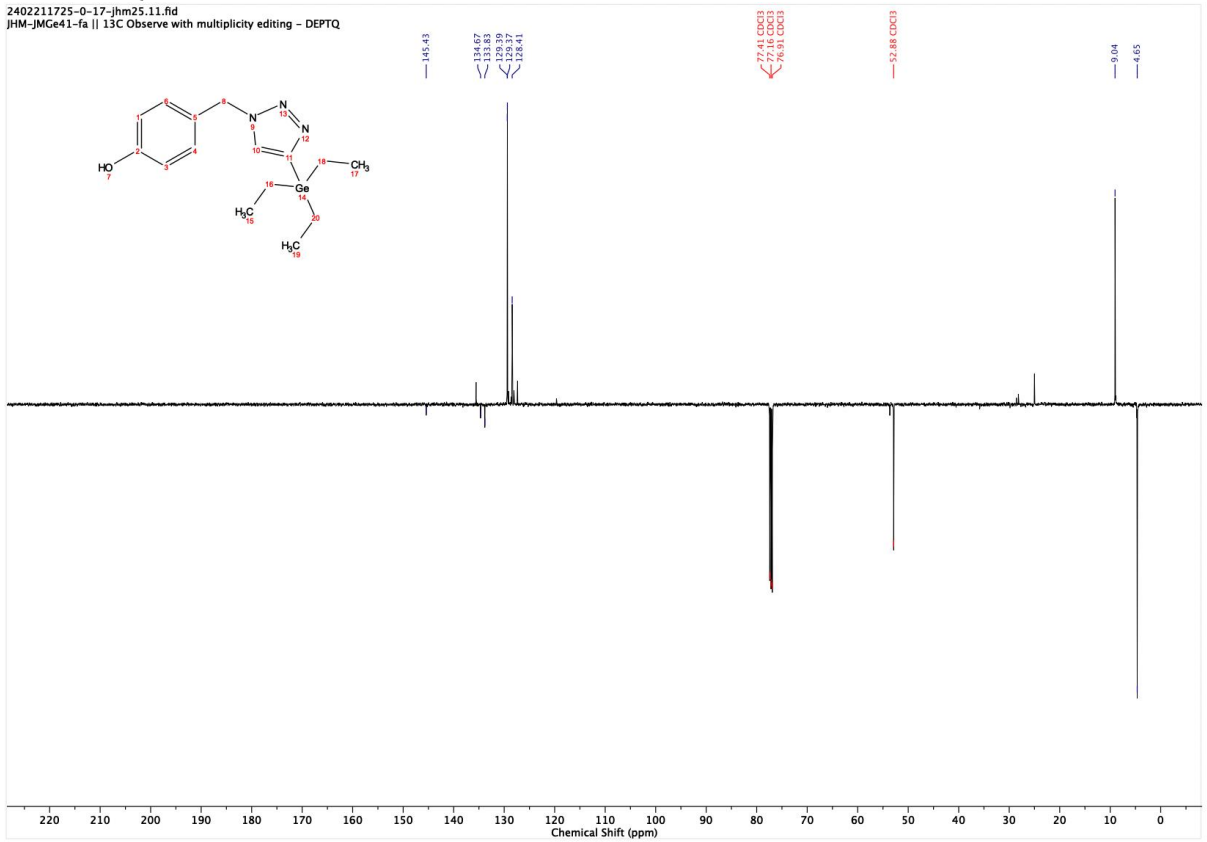

33 - <sup>1</sup>H

2402231653-0-47-jhm25.10.fid  
JHM-JMGe46-fa || 1H Observe

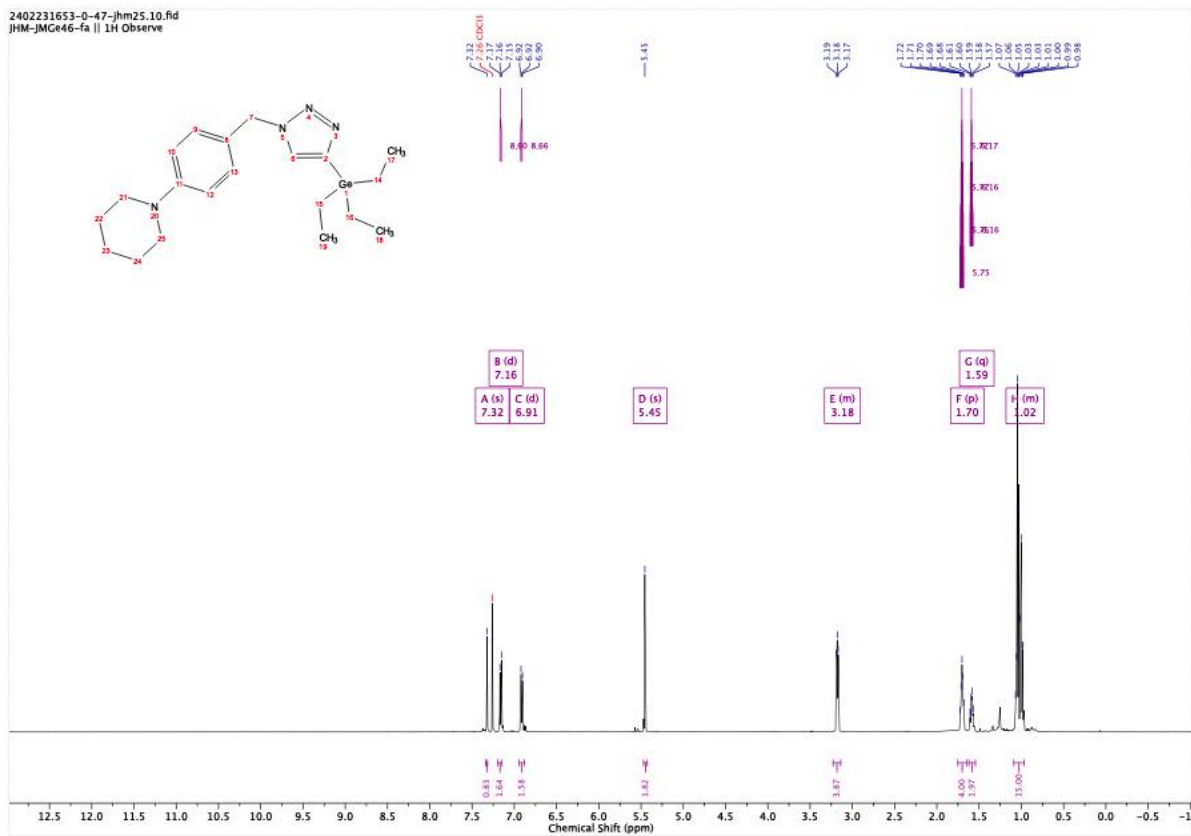

<sup>13</sup>C DEPTQ

2402231653-0-47-jhm25.11.fid  
JHM-JMGe46-fa || 13C Observe with multiplicity editing - DEPTQ

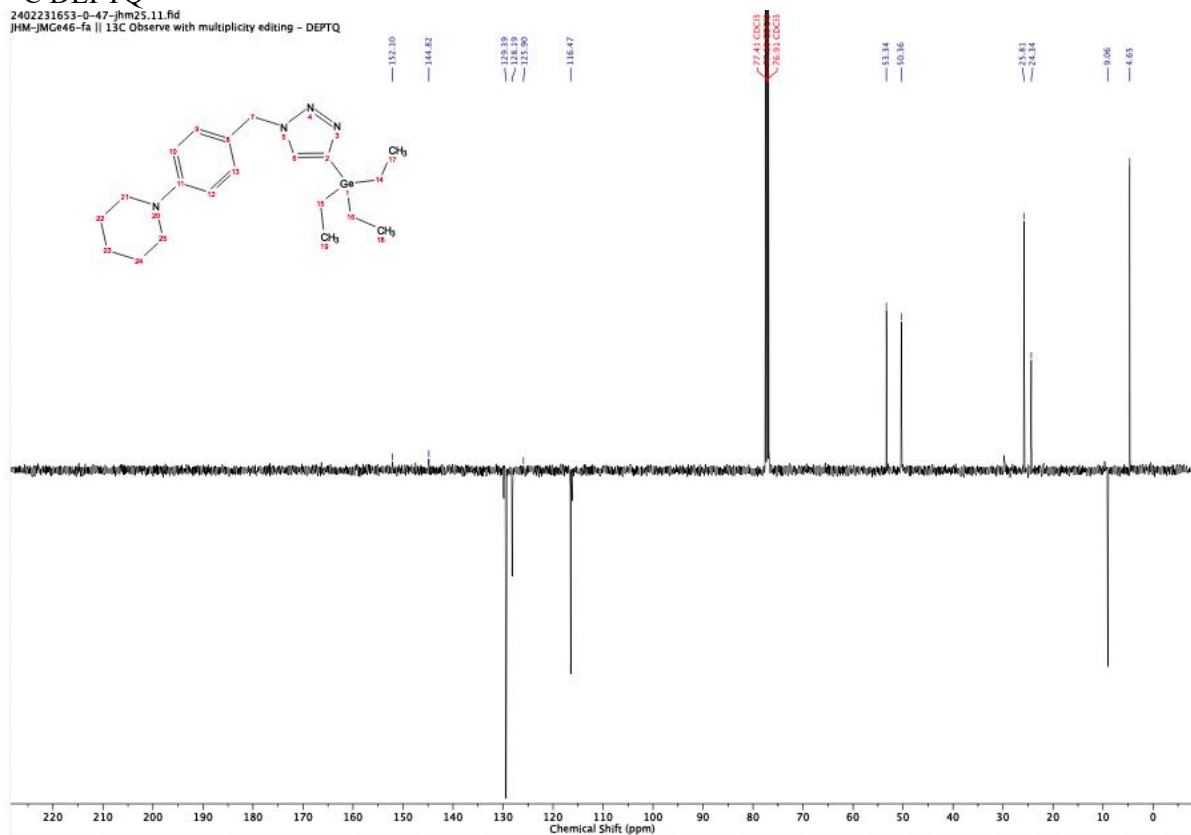

34 - <sup>1</sup>H

E73123.1.fid  
Person mfb17200  
FP805-1-1P

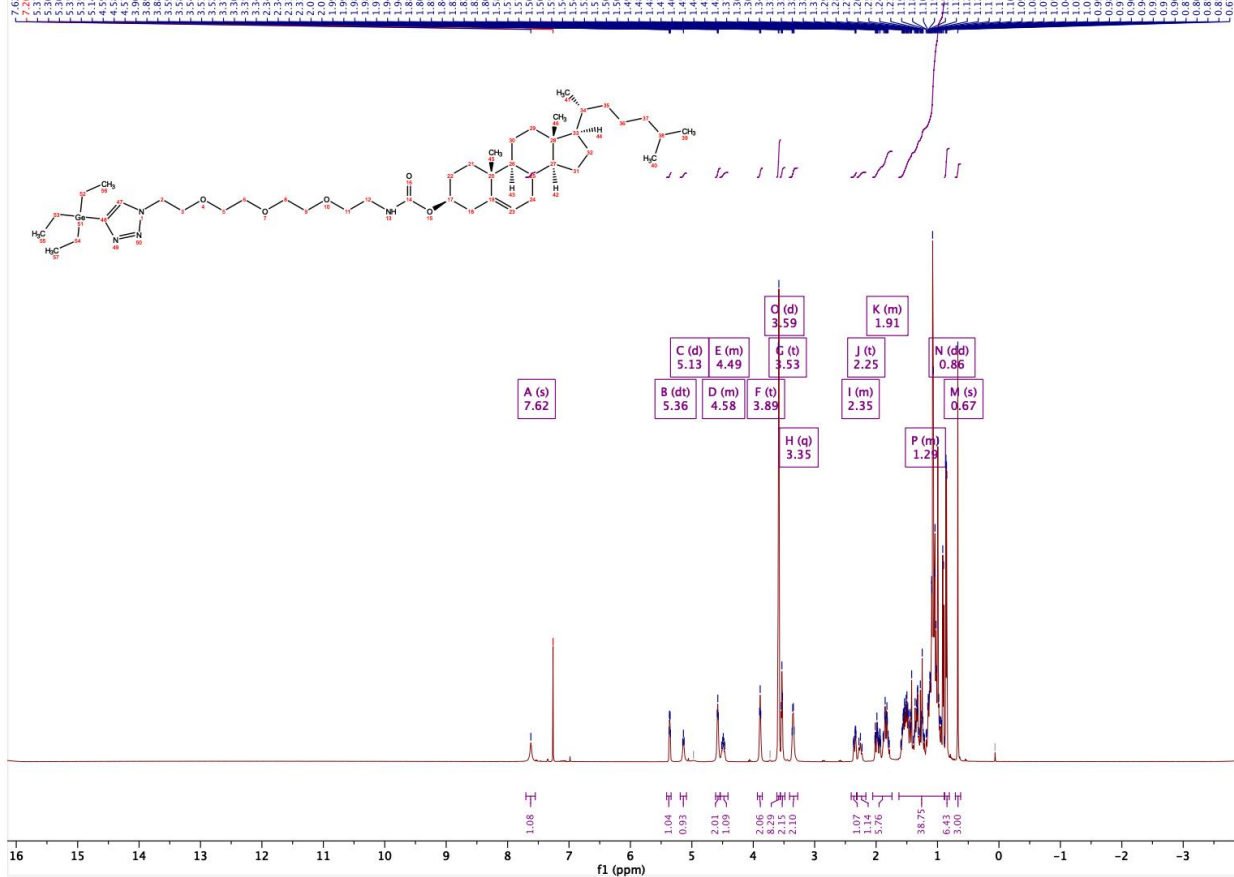

<sup>13</sup>C

E73123.2.fid  
Person mfb17200  
FP805-1-1P

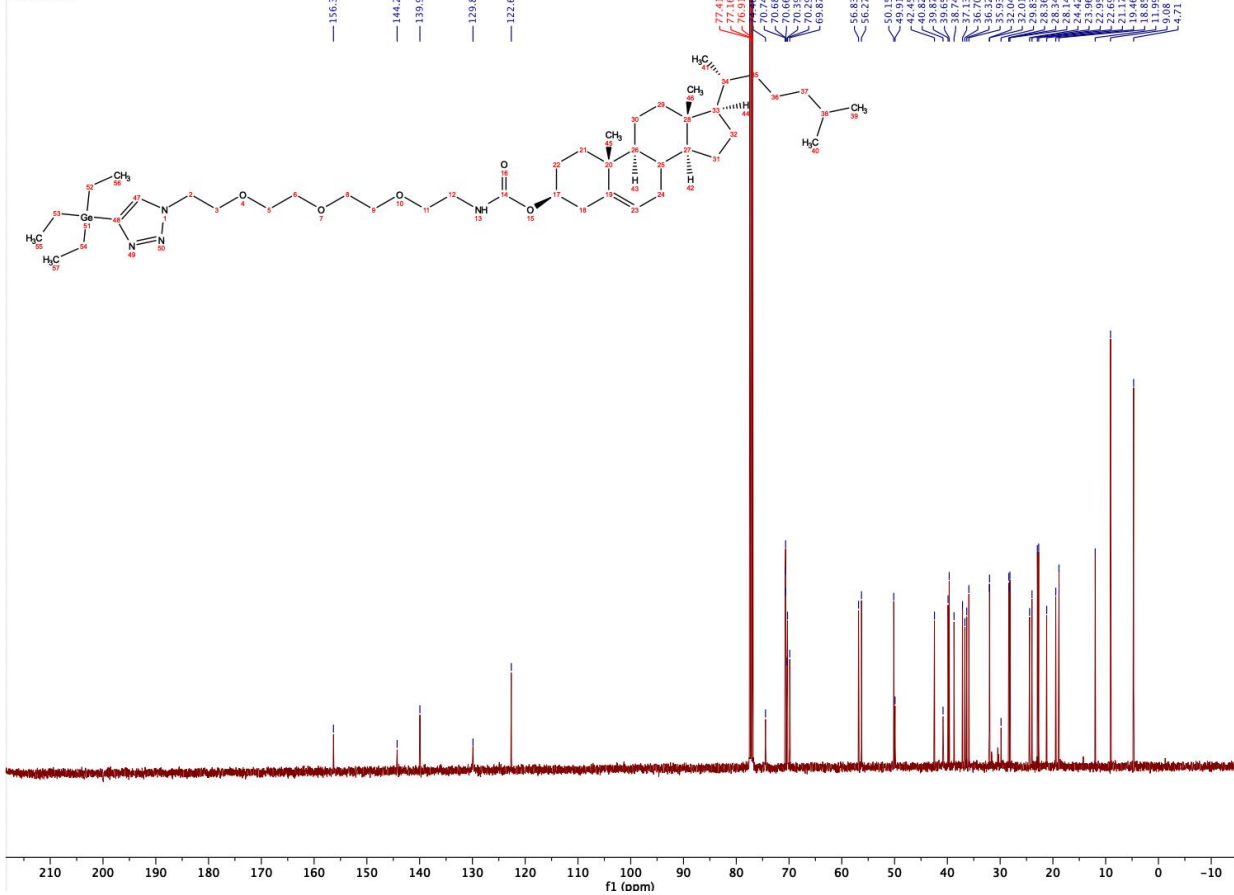

35 - <sup>1</sup>H

E73309.1.fid  
Person mfb17200  
FP808-1-1P

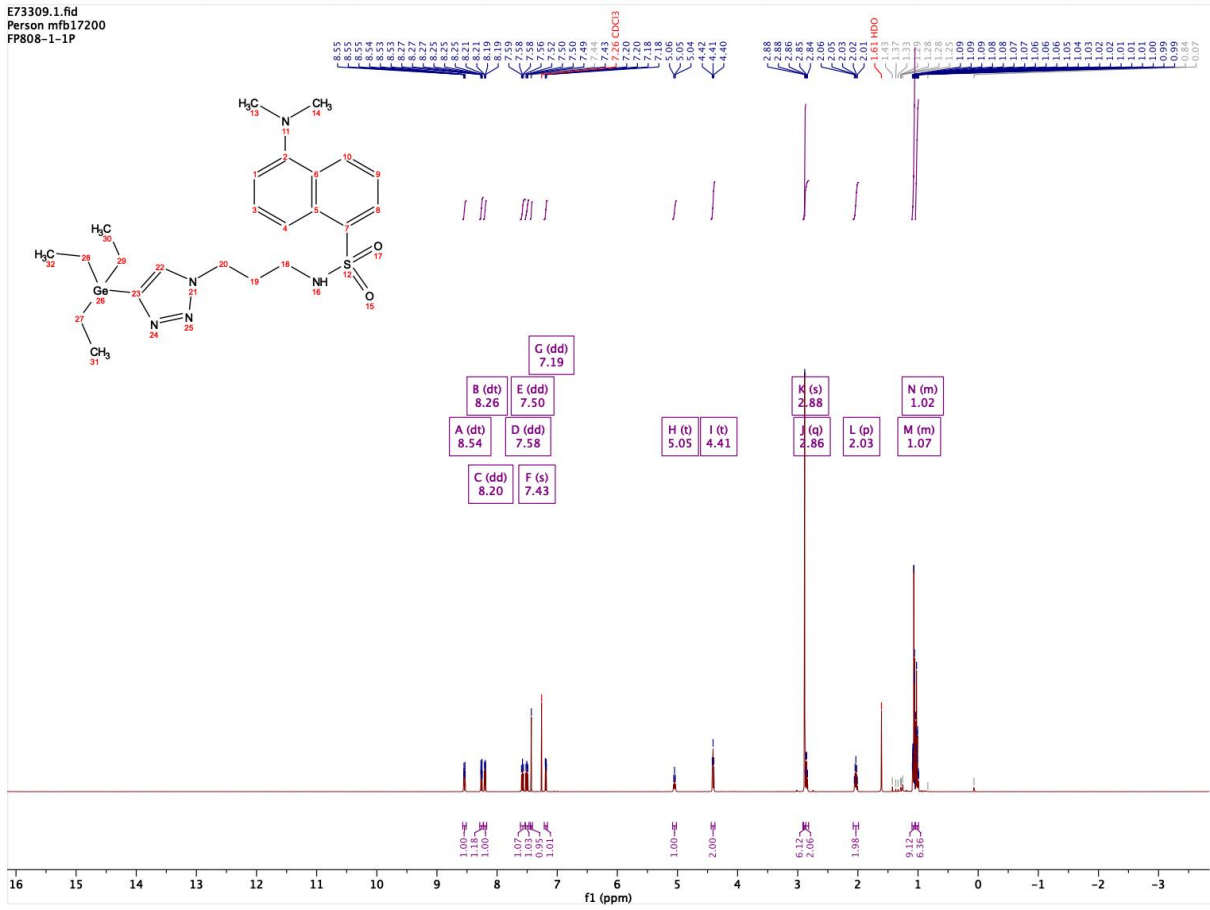

<sup>13</sup>C

E73309.2.fid  
Person mfb17200  
FP808-1-1P

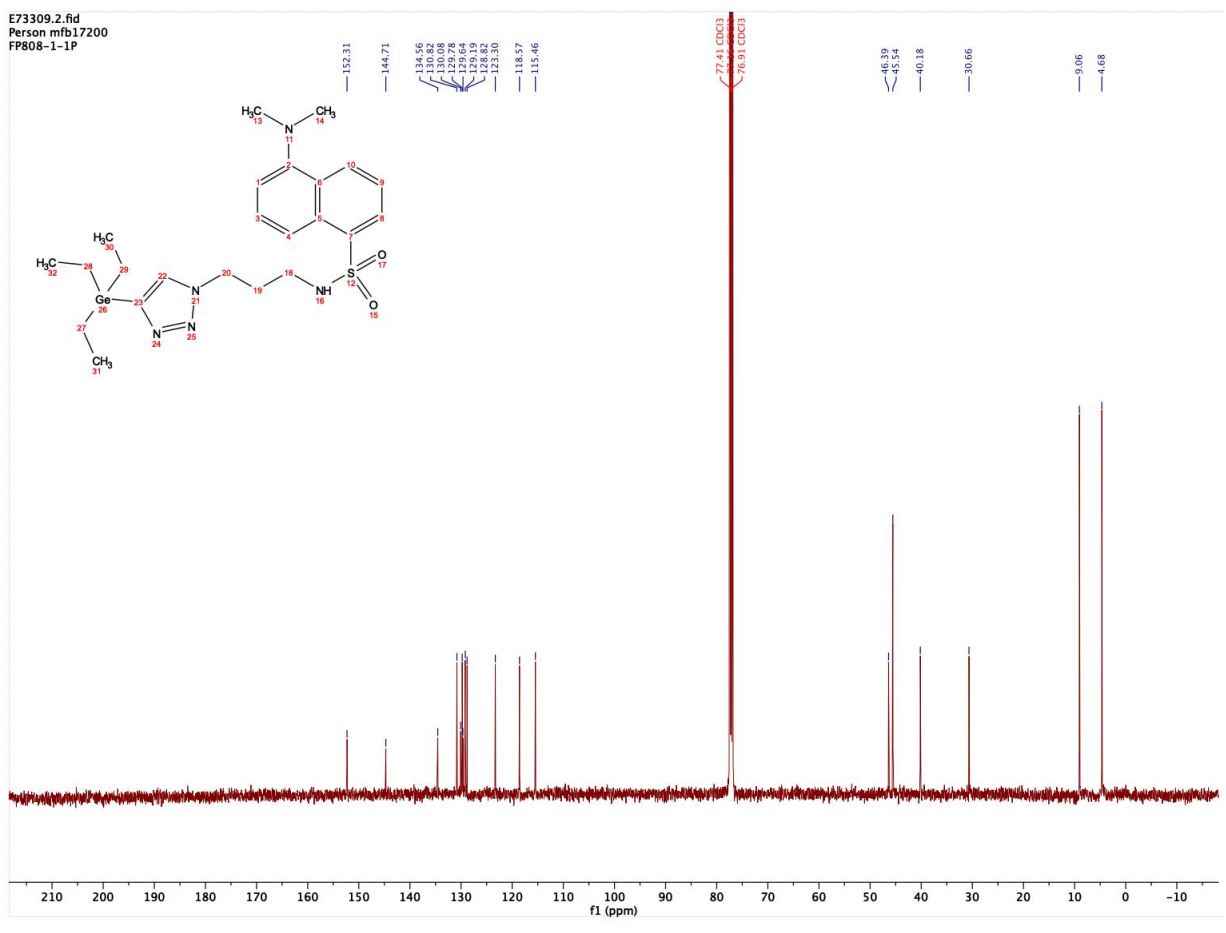

Supplement: Additional file 1 [file 1860-5397-20-265-S1.pdf]
