# Supplementary material for: Germanyl triazoles as a platform for CuAAC diversification and chemoselective orthogonal cross-coupling
Source: publisher site journal article supplement (doi:10.3762/bjoc.20.265), 2024-12-05

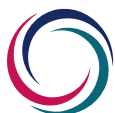

## Supporting Information

for

### **Germany triazoles as a platform for CuAAC diversification and chemoselective orthogonal cross-coupling**

John M. Halford-McGuff, Thomas M. Richardson, Aidan P. McKay, Frederik Peschke, Glenn A. Burley and Allan J. B. Watson

*Beilstein J. Org. Chem.* **2024**, *20*, 3198–3204. [doi:10.3762/bjoc.20.265](https://doi.org/10.3762/bjoc.20.265)

### **Checkcif file for compound 13**

## checkCIF/PLATON report

Structure factors have been supplied for datablock(s) 13

THIS REPORT IS FOR GUIDANCE ONLY. IF USED AS PART OF A REVIEW PROCEDURE FOR PUBLICATION, IT SHOULD NOT REPLACE THE EXPERTISE OF AN EXPERIENCED CRYSTALLOGRAPHIC REFEREE.

No syntax errors found.      CIF dictionary      Interpreting this report

### Datablock: 13

---

Bond precision:      C-C = 0.0129 Å      Wavelength=0.71073

Cell:                      a=7.19194(13)      b=15.2354(4)      c=42.5349(9)  
                                    alpha=90              beta=90              gamma=90

Temperature:              100 K

|                        | Calculated      | Reported        |
|------------------------|-----------------|-----------------|
| Volume                 | 4660.64(18)     | 4660.64(18)     |
| Space group            | P 21 21 21      | P 21 21 21      |
| Hall group             | P 2ac 2ab       | P 2ac 2ab       |
| Moiety formula         | C28 H23 Ge N3 O | C28 H23 Ge N3 O |
| Sum formula            | C28 H23 Ge N3 O | C28 H23 Ge N3 O |
| Mr                     | 490.10          | 490.08          |
| Dx, g cm <sup>-3</sup> | 1.397           | 1.397           |
| Z                      | 8               | 8               |
| Mu (mm <sup>-1</sup> ) | 1.340           | 1.340           |
| F000                   | 2016.0          | 2016.0          |
| F000'                  | 2017.76         |                 |
| h, k, lmax             | 9, 20, 58       | 9, 20, 53       |
| Nref                   | 12594[ 7057]    | 10795           |
| Tmin, Tmax             | 0.886, 0.987    | 0.646, 1.000    |
| Tmin'                  | 0.886           |                 |

Correction method= # Reported T Limits: Tmin=0.646 Tmax=1.000  
AbsCorr = MULTI-SCAN

Data completeness= 1.53/0.86      Theta(max)= 29.184

R(reflections)= 0.0524( 8363)

wR2(reflections)=  
0.1014( 10795)

S = 1.091

Npar= 596

---

The following ALERTS were generated. Each ALERT has the format

**test-name\_ALERT\_alert-type\_alert-level.**

Click on the hyperlinks for more details of the test.

---

● **Alert level C**

STRVA01\_ALERT\_4\_C                    Flack test results are ambiguous.  
    From the CIF: `_refine_ls_abs_structure_Flack`      0.490  
    From the CIF: `_refine_ls_abs_structure_Flack_su`    0.030

PLAT213\_ALERT\_2\_C Atom C10                    has ADP max/min Ratio      3.5    oblate  
PLAT220\_ALERT\_2\_C NonSolvent    Resd 1    C    Ueq(max)/Ueq(min) Range      4.7    Ratio  
PLAT220\_ALERT\_2\_C NonSolvent    Resd 2    C    Ueq(max)/Ueq(min) Range      4.7    Ratio  
PLAT341\_ALERT\_3\_C Low Bond Precision on    C-C Bonds                    0.01285 Ang.  
PLAT906\_ALERT\_3\_C Large K Value in the Analysis of Variance      3.030    Check

---

● **Alert level G**

PLAT003\_ALERT\_2\_G Number of Uiso or Uij Restrained non-H Atoms ...      5    Report  
PLAT033\_ALERT\_4\_G Flack x Value Deviates > 3.0 \* sigma from Zero .      0.490    Note  
PLAT083\_ALERT\_2\_G SHELXL Second Parameter in WGHT Unusually Large      9.73    Why ?  
PLAT111\_ALERT\_2\_G ADDSYM Detects New (Pseudo) Centre of Symmetry .      100    %Fit  
PLAT112\_ALERT\_2\_G ADDSYM Detects New (Pseudo) Symm. Elem            c      100    %Fit  
PLAT112\_ALERT\_2\_G ADDSYM Detects New (Pseudo) Symm. Elem            a      100    %Fit  
PLAT112\_ALERT\_2\_G ADDSYM Detects New (Pseudo) Symm. Elem            b      100    %Fit  
PLAT113\_ALERT\_2\_G ADDSYM Suggests Possible Pseudo/New Space Group      Pbca    Check  
    Check Model Parameter Symmetry for Reflection Data Support

PLAT186\_ALERT\_4\_G The CIF-Embedded .res File Contains ISOR Records      4    Report  
PLAT187\_ALERT\_4\_G The CIF-Embedded .res File Contains RIGU Records      4    Report  
PLAT860\_ALERT\_3\_G Number of Least-Squares Restraints                    144    Note  
PLAT910\_ALERT\_3\_G Missing # of FCF Reflection(s) Below Theta(Min).      4    Note  
    0 1 1, 0 0 2, 0 1 2, 0 0 4,  
PLAT912\_ALERT\_4\_G Missing # of FCF Reflections Above STh/L= 0.600      667    Note  
PLAT933\_ALERT\_2\_G Number of HKL-OMIT Records in Embedded .res File      2    Note  
    0 0 4, 0 1 2,  
PLAT952\_ALERT\_5\_G Calculated (ThMax) and CIF-Reported Lmax Differ.      5    Units  
PLAT958\_ALERT\_1\_G Calculated (ThMax) and Actual (FCF) Lmax Differ.      5    Units  
PLAT969\_ALERT\_5\_G The 'Henn et al.' R-Factor-gap value                    2.43    Note  
    Predicted wR2: Based on SigI\*\*2 4.18 or SHELX Weight 9.57  
PLAT978\_ALERT\_2\_G Number C-C Bonds with Positive Residual Density.      0    Info

---

- 0 **ALERT level A** = Most likely a serious problem - resolve or explain  
0 **ALERT level B** = A potentially serious problem, consider carefully  
6 **ALERT level C** = Check. Ensure it is not caused by an omission or oversight  
18 **ALERT level G** = General information/check it is not something unexpected
- 1 ALERT type 1 CIF construction/syntax error, inconsistent or missing data  
12 ALERT type 2 Indicator that the structure model may be wrong or deficient  
4 ALERT type 3 Indicator that the structure quality may be low  
5 ALERT type 4 Improvement, methodology, query or suggestion  
2 ALERT type 5 Informative message, check
-

It is advisable to attempt to resolve as many as possible of the alerts in all categories. Often the minor alerts point to easily fixed oversights, errors and omissions in your CIF or refinement strategy, so attention to these fine details can be worthwhile. In order to resolve some of the more serious problems it may be necessary to carry out additional measurements or structure refinements. However, the purpose of your study may justify the reported deviations and the more serious of these should normally be commented upon in the discussion or experimental section of a paper or in the "special\_details" fields of the CIF. checkCIF was carefully designed to identify outliers and unusual parameters, but every test has its limitations and alerts that are not important in a particular case may appear. Conversely, the absence of alerts does not guarantee there are no aspects of the results needing attention. It is up to the individual to critically assess their own results and, if necessary, seek expert advice.

### **Publication of your CIF in IUCr journals**

A basic structural check has been run on your CIF. These basic checks will be run on all CIFs submitted for publication in IUCr journals (*Acta Crystallographica*, *Journal of Applied Crystallography*, *Journal of Synchrotron Radiation*); however, if you intend to submit to *Acta Crystallographica Section C* or *E* or *IUCrData*, you should make sure that full publication checks are run on the final version of your CIF prior to submission.

### **Publication of your CIF in other journals**

Please refer to the *Notes for Authors* of the relevant journal for any special instructions relating to CIF submission.

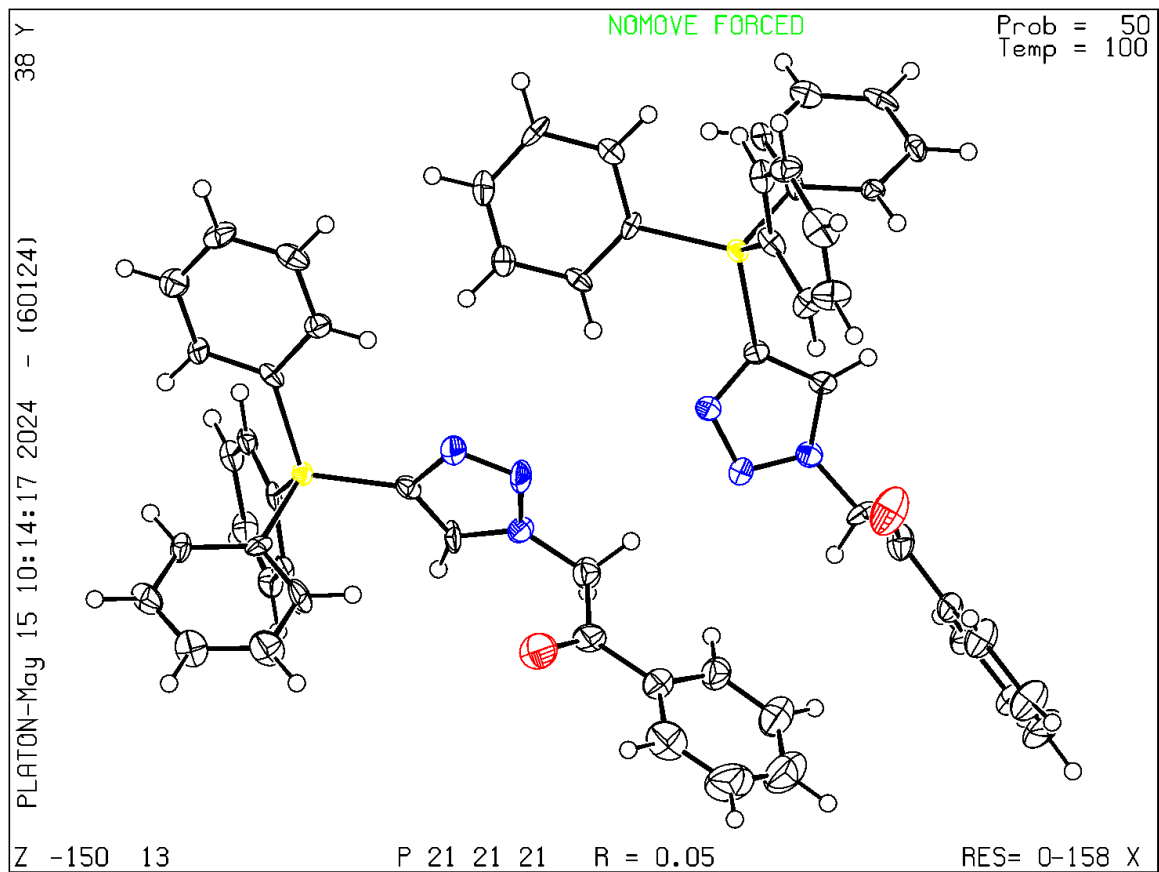

Supplement: Additional file 3 [file 1860-5397-20-265-S3.pdf]
